# Supplementary material for: Proteins Involved in Motility and Sperm-Egg Interaction Evolve More Rapidly in Mouse Spermatozoa
Source: PubMed Central journal article supplement (PMC3948348; doi:10.1371/journal.pone.0091302), 2014-03-07
Supplement: pone.0091302.s001.pdf [file pone.0091302.s001.pdf]

**Table S1.** Lists of compiled proteins.

| Proteins from previous mouse sperm proteomes |                                                         |           |
|----------------------------------------------|---------------------------------------------------------|-----------|
| Protein Symbol                               | Protein Name                                            | Reference |
| 0710001P09Rik                                | coiled-coil-helix-coiled-coil-helix domain containing 6 | [2]       |
| 1100001H23Rik                                | phospholipase B domain containing 1                     | [1]       |
| 1110017D15Rik                                | RIKEN cDNA 1110017D15 gene                              | [2]       |
| 1110020P15Rik                                | RIKEN cDNA 1110020P15 gene                              | [2]       |
| 1190002A17Rik                                | RIKEN cDNA 1190002A17 gene                              | [2]       |
| 1500001M20Rik                                | RIKEN cDNA 1500001M20 gene                              | [2]       |
| 1600016N20Rik                                | RIKEN cDNA 1600016N20 gene                              | [2]       |
| 1700001L19Rik                                | RIKEN cDNA 1700001L19 gene                              | [2]       |
| 1700001O22Rik                                | RIKEN cDNA 1700001O22 gene                              | [2]       |
| 1700007K13Rik                                | RIKEN cDNA 1700007K13 gene                              | [2]       |
| 1700009P17Rik                                | RIKEN cDNA 1700009P17 gene                              | [2]       |
| 1700011F03Rik                                | RIKEN cDNA 1700011F03 gene                              | [2]       |
| 1700013F07Rik                                | RIKEN cDNA 1700013F07 gene                              | [2]       |
| 1700014D04Rik                                | RIKEN cDNA 1700014D04 gene                              | [2]       |
| 1700018L24Rik                                | RIKEN cDNA 1700018L24 gene                              | [1],[2]   |
| 1700019B03Rik                                | RIKEN cDNA 1700019B03 gene                              | [2]       |
| 1700019D03Rik                                | RIKEN cDNA 1700019D03 gene                              | [2]       |
| 1700019L03Rik                                | RIKEN cDNA 1700019L03 gene                              | [2]       |
| 1700019N19Rik                                | RIKEN cDNA 1700019N19 gene                              | [2]       |
| 1700019O17Rik                                | RIKEN cDNA 1700019O17 gene                              | [2]       |
| 1700020K04Rik                                | RIKEN cDNA 1700020K04 gene                              | [2]       |
| 1700021F05Rik                                | RIKEN cDNA 1700021F05 gene                              | [2]       |
| 1700022A21Rik                                | RIKEN cDNA 1700022A21 gene                              | [2]       |
| 1700023D08Rik                                | RIKEN cDNA 1700023D08 gene                              | [2]       |
| 1700023E05Rik                                | RIKEN cDNA 1700023E05 gene                              | [2]       |
| 1700024P04Rik                                | RIKEN cDNA 1700024P04 gene                              | [2]       |
| 1700026D08Rik                                | RIKEN cDNA 1700026D08 gene                              | [2]       |
| 1700026L06Rik                                | RIKEN cDNA 1700026L06 gene                              | [2]       |
| 1700027A15Rik                                | RIKEN cDNA 1700027A15 gene                              | [2]       |
| 1700027D21Rik                                | RIKEN cDNA 1700027D21 gene                              | [2]       |
| 1700034I23Rik                                | RIKEN cDNA 1700034I23 gene                              | [2]       |
| 1700049K14Rik                                | RIKEN cDNA 1700049K14 gene                              | [2]       |

| Proteins from previous mouse sperm proteomes |                                              |           |
|----------------------------------------------|----------------------------------------------|-----------|
| Protein Symbol                               | Protein Name                                 | Reference |
| 1700055M20Rik                                | testis, prostate and placenta expressed      | [2]       |
| 1700058C13Rik                                | RIKEN cDNA 1700058C13 gene                   | [2]       |
| 1700061G19Rik                                | RIKEN cDNA 1700061G19 gene                   | [2]       |
| 1700065I17Rik                                | RIKEN cDNA 1700065I17 gene                   | [2]       |
| 1700071K01Rik                                | RIKEN cDNA 1700071K01 gene                   | [2]       |
| 1700080O16Rik                                | RIKEN cDNA 1700080O16 gene                   | [2]       |
| 1700081D17Rik                                | phosphatidylethanolamine binding protein 4   | [1]       |
| 1700101E01Rik                                | RIKEN cDNA 1700101E01 gene                   | [2]       |
| 1700110M21Rik                                | RIKEN cDNA 1700110M21 gene                   | [2]       |
| 1700112C13Rik                                | RIKEN cDNA 1700112C13 gene                   | [1],[2]   |
| 1700113O17Rik                                | RIKEN cDNA 1700113O17 gene                   | [2]       |
| 2810002D13Rik                                | leucine rich repeat containing 57            | [2]       |
| 2810408A11Rik                                | RIKEN cDNA 2810408A11 gene                   | [2]       |
| 4732415M23Rik                                | RIKEN cDNA 4732415M23 gene                   | [2]       |
| 4921507P07Rik                                | RIKEN cDNA 4921507P07 gene                   | [2]       |
| 4921517D21Rik                                | RIKEN cDNA 4921517D21 gene                   | [2]       |
| 4921523A10Rik                                | RIKEN cDNA 4921523A10 gene                   | [2]       |
| 4921524E03Rik                                | aldolase 1, A isoform, retrogene 1           | [2]       |
| 4921530D09Rik                                | RIKEN cDNA 4921530D09 gene                   | [2]       |
| 4930404N11Rik                                | RIKEN cDNA 4930404N11 gene                   | [2]       |
| 4930408G06Rik                                | RIKEN cDNA 4930408G06 gene                   | [2]       |
| 4930415O20Rik                                | RIKEN cDNA 4930415O20 gene                   | [2]       |
| 4930435E12Rik                                | RIKEN cDNA 4930435E12 gene                   | [2]       |
| 4930443G12Rik                                | RIKEN cDNA 4930443G12 gene                   | [2]       |
| 4930511I11Rik                                | RIKEN cDNA 4930511I11 gene                   | [2],[3]   |
| 4930519F16Rik                                | RIKEN cDNA 4930519F16 gene                   | [2]       |
| 4930522H14Rik                                | RIKEN cDNA 4930522H14 gene                   | [2]       |
| 4930523C11Rik                                | a disintegrin and metallopeptidase domain 6B | [1],[2]   |
| 4930550C14Rik                                | RIKEN cDNA 4930550C14 gene                   | [2]       |
| 4930555I21Rik                                | RIKEN cDNA 4930555I21 gene                   | [2]       |
| 4930579C15Rik                                | RIKEN cDNA 4930579C15 gene                   | [2]       |
| 4930579J09Rik                                | RIKEN cDNA 4930579J09 gene                   | [2]       |
| 4931408C20Rik                                | RIKEN cDNA 4931408C20 gene                   | [2]       |
| 4931423N10Rik                                | RIKEN cDNA 4931423N10 gene                   | [2]       |

| Proteins from previous mouse sperm proteomes |                                                            |           |
|----------------------------------------------|------------------------------------------------------------|-----------|
| Protein Symbol                               | Protein Name                                               | Reference |
| 4931432M23Rik                                | RIKEN cDNA 4931432M23 gene                                 | [2]       |
| 4932425I24Rik                                | RIKEN cDNA 4932425I24 gene                                 | [2]       |
| 4932441B19Rik                                | RIKEN cDNA 4932441B19 gene                                 | [2]       |
| 4933400C05Rik                                | RIKEN cDNA 4933400C05 gene                                 | [2]       |
| 4933405O20Rik                                | RIKEN cDNA 4933405O20 gene                                 | [2]       |
| 4933411K16Rik                                | RIKEN cDNA 4933411K16 gene                                 | [2]       |
| 5730437N04Rik                                | RIKEN cDNA 5730437N04 gene                                 | [2]       |
| 5730469M10Rik                                | RIKEN cDNA 5730469M10 gene                                 | [2]       |
| 9030607L17Rik                                | RIKEN cDNA 9030607L17 gene                                 | [2]       |
| 9130227C08Rik                                | RIKEN cDNA 9130227C08Rik gene                              | [2]       |
| 9230002F21Rik                                | defensin beta 22                                           | [1]       |
| AA467197                                     | expressed sequence AA467197                                | [2]       |
| Abca13                                       | ATP-binding cassette, sub-family A (ABC1), member 13       | [2]       |
| Abcb10                                       | ATP-binding cassette, sub-family B (MDR/TAP), member 10    | [2]       |
| Abcc12                                       | ATP-binding cassette, sub-family C (CFTR/MRP), member 12   | [1]       |
| Abcg2                                        | ATP-binding cassette, sub-family G (WHITE), member 2       | [1],[3]   |
| Abhd11                                       | abhydrolase domain containing 11                           | [2]       |
| Acad9                                        | acyl-Coenzyme A dehydrogenase family, member 9             | [2]       |
| Acadvl                                       | acyl-Coenzyme A dehydrogenase, very long chain             | [2]       |
| Acat1                                        | acetyl-Coenzyme A acetyltransferase 1                      | [2]       |
| Ace                                          | angiotensin I converting enzyme (peptidyl-dipeptidase A) 1 | [1],[2]   |
| Ace3                                         | angiotensin I converting enzyme (peptidyl-dipeptidase A) 3 | [1],[2]   |
| Aco2                                         | aconitase 2, mitochondrial                                 | [2]       |
| Acot10                                       | acyl-CoA thioesterase 10                                   | [2]       |
| Acot7                                        | acyl-CoA thioesterase 7                                    | [2]       |
| Acot9                                        | acyl-CoA thioesterase 9                                    | [2]       |
| Acr                                          | acrosin prepropeptide                                      | [1],[2]   |
| Acrbp                                        | proacrosin binding protein                                 | [1],[2]   |
| Acrv1                                        | acrosomal vesicle protein 1                                | [1],[2]   |
| Acsbg2                                       | acyl-CoA synthetase bubblegum family member 2              | [2]       |
| Acs11                                        | acyl-CoA synthetase long-chain family member 1             | [2],[3]   |
| Acta1                                        | actin, alpha 1, skeletal muscle                            | [2]       |
| Actb                                         | actin, beta                                                | [2],[3]   |
| Actc1                                        | actin, alpha, cardiac muscle 1                             | [3]       |

| Proteins from previous mouse sperm proteomes |                                                                        |           |
|----------------------------------------------|------------------------------------------------------------------------|-----------|
| Protein Symbol                               | Protein Name                                                           | Reference |
| Actl7a                                       | actin-like 7a                                                          | [2]       |
| Actn4                                        | actinin alpha 4                                                        | [3]       |
| Actrt1                                       | actin-related protein T1                                               | [2]       |
| Actrt2                                       | actin-related protein T2                                               | [2]       |
| Acyp1                                        | acylphosphatase 1, erythrocyte (common) type                           | [2]       |
| Adam1b                                       | a disintegrin and metallopeptidase domain 1b                           | [1],[2]   |
| Adam2                                        | a disintegrin and metallopeptidase domain 2                            | [1],[2]   |
| Adam24                                       | a disintegrin and metallopeptidase domain 24 (testase 1)               | [1]       |
| Adam3                                        | a disintegrin and metallopeptidase domain 3 (cyritestin)               | [1],[2]   |
| Adam4                                        | a disintegrin and metallopeptidase domain 4                            | [1]       |
| Adam5                                        | a disintegrin and metallopeptidase domain 5                            | [1]       |
| Adam6                                        | a disintegrin and metallopeptidase domain 6A                           | [1],[2]   |
| Adh1                                         | alcohol dehydrogenase 1 (class I)                                      | [3]       |
| Agfg1                                        | ArfGAP with FG repeats 1                                               | [2]       |
| Agt                                          | angiotensinogen (serpin peptidase inhibitor, clade A, member 8)        | [3]       |
| Ahcy                                         | S-adenosylhomocysteine hydrolase                                       | [2]       |
| Aim1l                                        | absent in melanoma 1-like                                              | [2]       |
| Ak1                                          | adenylate kinase 1                                                     | [2]       |
| Ak2                                          | adenylate kinase 2                                                     | [2]       |
| Ak7                                          | adenylate kinase 7                                                     | [2]       |
| Akap13                                       | A kinase (PRKA) anchor protein 13                                      | [2]       |
| Akap3                                        | A kinase (PRKA) anchor protein 3                                       | [2],[3]   |
| Akap4                                        | A kinase (PRKA) anchor protein 4                                       | [2],[3]   |
| Akr1a4                                       | aldo-keto reductase family 1, member A4 (aldehyde reductase)           | [3]       |
| Akr1b10                                      | aldo-keto reductase family 1, member B10 (aldose reductase)            | [2]       |
| Akr1b3                                       | aldo-keto reductase family 1, member B3 (aldose reductase)             | [2],[3]   |
| Akr1b7                                       | aldo-keto reductase family 1, member B7                                | [3]       |
| Akr7a5                                       | aldo-keto reductase family 7, member A5 (aflatoxin aldehyde reductase) | [2]       |
| Alad                                         | aminolevulinate, delta-, dehydratase                                   | [3]       |
| Alb                                          | albumin                                                                | [2],[3]   |
| Aldh1a1                                      | aldehyde dehydrogenase family 1, subfamily A1                          | [3]       |
| Aldh1a2                                      | aldehyde dehydrogenase family 1, subfamily A2                          | [2]       |
| Aldh9a1                                      | aldehyde dehydrogenase 9, subfamily A1                                 | [2]       |

| Proteins from previous mouse sperm proteomes |                                                                                    |           |
|----------------------------------------------|------------------------------------------------------------------------------------|-----------|
| Protein Symbol                               | Protein Name                                                                       | Reference |
| Aldoa                                        | aldolase A, fructose-bisphosphate                                                  | [2],[3]   |
| Aldoart2                                     | aldolase 1, A isoform, retrogene 2                                                 | [3]       |
| Aldoc                                        | aldolase C, fructose-bisphosphate                                                  | [2]       |
| Alms1                                        | Alstrom syndrome 1 homolog (human)                                                 | [2]       |
| Als2cr11                                     | amyotrophic lateral sclerosis 2 (juvenile) chromosome region, candidate 11 (human) | [2]       |
| Amdhd2                                       | amidohydrolase domain containing 2                                                 | [2]       |
| Anapc5                                       | anaphase-promoting complex subunit 5                                               | [2]       |
| Ank1                                         | ankyrin 1, erythroid                                                               | [2]       |
| Ankrd11                                      | ankyrin repeat domain 11                                                           | [2]       |
| Ankrd5                                       | ankyrin repeat domain 5                                                            | [2]       |
| Ankrd57                                      | ankyrin repeat domain 57                                                           | [2]       |
| Anxa2                                        | annexin A2                                                                         | [3]       |
| Anxa4                                        | annexin A4                                                                         | [3]       |
| Anxa5                                        | annexin A5                                                                         | [3]       |
| Anxa6                                        | annexin A6                                                                         | [3]       |
| Ap3d1                                        | adaptor-related protein complex 3, delta 1 subunit                                 | [2]       |
| Apbb2                                        | amyloid beta (A4) precursor protein-binding, family B, member 2                    | [2]       |
| Apoa1                                        | apolipoprotein A-I                                                                 | [3]       |
| Apoa1bp                                      | apolipoprotein A-I binding protein                                                 | [1],[2]   |
| Apoa2                                        | apolipoprotein A-II                                                                | [3]       |
| Apoa4                                        | apolipoprotein A-IV                                                                | [3]       |
| Apof                                         | apolipoprotein F                                                                   | [2]       |
| Apoo                                         | apolipoprotein O                                                                   | [2]       |
| Apool                                        | apolipoprotein O-like                                                              | [2]       |
| Aqp7                                         | aquaporin 7                                                                        | [1],[2]   |
| Arf2                                         | ADP-ribosylation factor 2                                                          | [2]       |
| Arf6                                         | ADP-ribosylation factor 6                                                          | [2]       |
| Arhgap17                                     | Rho GTPase activating protein 17                                                   | [2]       |
| Arhgdia                                      | Rho GDP dissociation inhibitor (GDI) alpha                                         | [3]       |
| Arhgef1                                      | Rho guanine nucleotide exchange factor (GEF) 1                                     | [2]       |
| Armc3                                        | armadillo repeat containing 3                                                      | [2]       |
| Arpm1                                        | actin related protein M1                                                           | [2]       |
| Arsa                                         | arylsulfatase A                                                                    | [1],[2]   |
| Art3                                         | ADP-ribosyltransferase 3                                                           | [2]       |

| Proteins from previous mouse sperm proteomes |                                                                                               |           |
|----------------------------------------------|-----------------------------------------------------------------------------------------------|-----------|
| Protein Symbol                               | Protein Name                                                                                  | Reference |
| Asb9                                         | ankyrin repeat and SOCS box-containing 9                                                      | [2]       |
| Asrgl1                                       | asparaginase like 1                                                                           | [2]       |
| Atg16l1                                      | autophagy-related 16-like 1 (yeast)                                                           | [2]       |
| Atn1                                         | atrophin 1                                                                                    | [2]       |
| Atox1                                        | ATX1 (antioxidant protein 1) homolog 1 (yeast)                                                | [3]       |
| Atp13a1                                      | ATPase type 13A1                                                                              | [2]       |
| Atp1a1                                       | ATPase, Na <sup>+</sup> /K <sup>+</sup> transporting, alpha 1 polypeptide                     | [1]       |
| Atp1a2                                       | ATPase, Na <sup>+</sup> /K <sup>+</sup> transporting, alpha 2 polypeptide                     | [2]       |
| Atp1a3                                       | ATPase, Na <sup>+</sup> /K <sup>+</sup> transporting, alpha 3 polypeptide                     | [2]       |
| Atp1a4                                       | ATPase, Na <sup>+</sup> /K <sup>+</sup> transporting, alpha 4 polypeptide                     | [1]       |
| Atp1b3                                       | ATPase, Na <sup>+</sup> /K <sup>+</sup> transporting, beta 3 polypeptide                      | [1],[2]   |
| Atp2b2                                       | ATPase, Ca <sup>++</sup> transporting, plasma membrane 2                                      | [2]       |
| Atp2b4                                       | ATPase, Ca <sup>++</sup> transporting, plasma membrane 4                                      | [1],[2]   |
| Atp5a1                                       | ATP synthase, H <sup>+</sup> transporting, mitochondrial F1 complex, alpha subunit, isoform 1 | [2],[3]   |
| Atp5b                                        | ATP synthase, H <sup>+</sup> transporting mitochondrial F1 complex, beta subunit              | [2],[3]   |
| Atp5c1                                       | ATP synthase, H <sup>+</sup> transporting, mitochondrial F1 complex, gamma polypeptide 1      | [2]       |
| Atp5d                                        | ATP synthase, H <sup>+</sup> transporting, mitochondrial F1 complex, delta subunit            | [2]       |
| Atp5f1                                       | ATP synthase, H <sup>+</sup> transporting, mitochondrial F0 complex, subunit b, isoform 1     | [2]       |
| Atp5h                                        | ATP synthase, H <sup>+</sup> transporting, mitochondrial F0 complex, subunit d                | [2]       |
| Atp5k                                        | ATP synthase, H <sup>+</sup> transporting, mitochondrial F1F0 complex, subunit e              | [2]       |
| Atp5l                                        | ATP synthase, H <sup>+</sup> transporting, mitochondrial F0 complex, subunit g                | [2]       |
| Atp5o                                        | ATP synthase, H <sup>+</sup> transporting, mitochondrial F1 complex, O subunit                | [2]       |
| Atp5s                                        | ATP synthase, H <sup>+</sup> transporting, mitochondrial F0 complex, subunit s                | [2]       |
| Atp6v1a                                      | ATPase, H <sup>+</sup> transporting, lysosomal V1 subunit A                                   | [2]       |
| Atp6v1b2                                     | ATPase, H <sup>+</sup> transporting, lysosomal V1 subunit B2                                  | [2]       |
| Atp6v1e1                                     | ATPase, H <sup>+</sup> transporting, lysosomal V1 subunit E1                                  | [2]       |
| Atp6v1h                                      | ATPase, H <sup>+</sup> transporting, lysosomal V1 subunit H                                   | [2]       |
| Atp8b3                                       | ATPase, class I, type 8B, member 3                                                            | [1]       |
| B2m                                          | beta-2 microglobulin                                                                          | [3]       |
| B4galt4                                      | UDP-Gal:betaGlcNAc beta 1,4-galactosyltransferase, polypeptide 4                              | [2]       |
| Basp1                                        | brain abundant, membrane attached signal protein 1                                            | [2],[3]   |
| Bat3                                         | HLA-B-associated transcript 3                                                                 | [2]       |
| BB014433                                     | expressed sequence BB014433                                                                   | [2]       |

| Proteins from previous mouse sperm proteomes |                                                                           |             |
|----------------------------------------------|---------------------------------------------------------------------------|-------------|
| Protein Symbol                               | Protein Name                                                              | Reference   |
| BC005764                                     | cDNA sequence BC005764                                                    | [2]         |
| BC049635                                     | cDNA sequence BC049635                                                    | [2]         |
| BC051142                                     | cDNA sequence BC051142                                                    | [2]         |
| BC089491                                     | cDNA sequence BC089491                                                    | [2]         |
| Bcs1l                                        | BCS1-like (yeast)                                                         | [2]         |
| Bdh1                                         | 3-hydroxybutyrate dehydrogenase, type 1                                   | [2]         |
| Birc6                                        | baculoviral IAP repeat-containing 6                                       | [2]         |
| Blvra                                        | biliverdin reductase A                                                    | [2]         |
| Bpgm                                         | 2,3-bisphosphoglycerate mutase                                            | [2]         |
| Brp44                                        | brain protein 44                                                          | [2]         |
| Bsg                                          | basigin                                                                   | [1],[2],[3] |
| Bspry                                        | B-box and SPRY domain containing                                          | [2]         |
| Bzrap1                                       | benzodiazapine receptor associated protein 1                              | [2]         |
| C130030J05                                   |                                                                           | [2]         |
| C130090K23Rik                                | cell wall biogenesis 43 C-terminal homolog (S. cerevisiae)                | [1]         |
| C1qbp                                        | complement component 1, q subcomponent binding protein                    | [2]         |
| C3                                           | complement component 3                                                    | [3]         |
| C77370                                       | expressed sequence C77370                                                 | [2]         |
| C920008N22Rik                                | RIKEN cDNA C920008N22 gene                                                | [2]         |
| Cabyr                                        | calcium-binding tyrosine-(Y)-phosphorylation regulated (fibrousheathin 2) | [2]         |
| Cacng3                                       | calcium channel, voltage-dependent, gamma subunit 3                       | [2]         |
| Calm1                                        | calmodulin 1                                                              | [2]         |
| Calm2                                        | calmodulin 2                                                              | [3]         |
| Calm3                                        | calmodulin 3                                                              | [3]         |
| Calr                                         | calreticulin                                                              | [1],[3]     |
| Camk4                                        | calcium/calmodulin-dependent protein kinase IV                            | [2]         |
| Cand1                                        | cullin associated and neddylation disassociated 1                         | [2]         |
| Canx                                         | calnexin                                                                  | [1],[2],[3] |
| Cap1                                         | CAP, adenylate cyclase-associated protein 1 (yeast)                       | [3]         |
| Capza3                                       | capping protein (actin filament) muscle Z-line, alpha 3                   | [2]         |
| Capzb                                        | capping protein (actin filament) muscle Z-line, beta                      | [2]         |
| Car2                                         | carbonic anhydrase 2                                                      | [2]         |
| Car3                                         | carbonic anhydrase 3                                                      | [3]         |
| Car4                                         | carbonic anhydrase 4                                                      | [1],[2]     |

| Proteins from previous mouse sperm proteomes |                                                                 |           |
|----------------------------------------------|-----------------------------------------------------------------|-----------|
| Protein Symbol                               | Protein Name                                                    | Reference |
| Casc1                                        | cancer susceptibility candidate 1                               | [2]       |
| Catsper4                                     | cation channel, sperm associated 4                              | [2]       |
| Cbr1                                         | carbonyl reductase 1                                            | [3]       |
| Cbr4                                         | carbonyl reductase 4                                            | [2]       |
| Ccdc105                                      | coiled-coil domain containing 105                               | [2]       |
| Ccdc11                                       | coiled-coil domain containing 11                                | [2]       |
| Ccdc116                                      | coiled-coil domain containing 116                               | [2]       |
| Ccdc135                                      | coiled-coil domain containing 135                               | [2]       |
| Ccdc136                                      | coiled-coil domain containing 136                               | [2]       |
| Ccdc151                                      | coiled-coil domain containing 151                               | [2]       |
| Ccdc19                                       | coiled-coil domain containing 19                                | [2]       |
| Ccdc21                                       | coiled-coil domain containing 21                                | [2]       |
| Ccdc27                                       | coiled-coil domain containing 27                                | [2]       |
| Ccdc40                                       | coiled-coil domain containing 40                                | [2]       |
| Ccdc58                                       | coiled-coil domain containing 58                                | [2]       |
| Ccdc63                                       | coiled-coil domain containing 63                                | [2]       |
| Ccdc81                                       | coiled-coil domain containing 81                                | [2]       |
| Ccdc88c                                      | coiled-coil domain containing 88C                               | [2]       |
| Ccin                                         | calicin                                                         | [2]       |
| Cct2                                         | chaperonin containing Tcp1, subunit 2 (beta)                    | [2]       |
| Cct3                                         | chaperonin containing Tcp1, subunit 3 (gamma)                   | [2]       |
| Cct4                                         | chaperonin containing Tcp1, subunit 4 (delta)                   | [2]       |
| Cct5                                         | chaperonin containing Tcp1, subunit 5 (epsilon)                 | [2]       |
| Cct6a                                        | chaperonin containing Tcp1, subunit 6a (zeta)                   | [2]       |
| Cct7                                         | chaperonin containing Tcp1, subunit 7 (eta)                     | [2]       |
| Cct8                                         | chaperonin containing Tcp1, subunit 8 (theta)                   | [2]       |
| Cd109                                        | CD109 antigen                                                   | [1],[2]   |
| Cd46                                         | CD46 antigen, complement regulatory protein                     | [1],[2]   |
| Cd55                                         | CD55 antigen                                                    | [2]       |
| Cdc34                                        | cell division cycle 34 homolog ( <i>S. cerevisiae</i> )         | [2]       |
| Ceacam2                                      | carcinoembryonic antigen-related cell adhesion molecule 2       | [2]       |
| Cecr5                                        | cat eye syndrome chromosome region, candidate 5 homolog (human) | [2]       |
| Centpe                                       | centromere protein E                                            | [2]       |
| Cep152                                       | centrosomal protein 152                                         | [2]       |



| Proteins from previous mouse sperm proteomes |                                                         |             |
|----------------------------------------------|---------------------------------------------------------|-------------|
| Protein Symbol                               | Protein Name                                            | Reference   |
| Cep350                                       | centrosomal protein 350                                 | [2]         |
| Ces3                                         | carboxylesterase 3                                      | [1],[3]     |
| Ces7                                         | carboxylesterase 7                                      | [1],[3]     |
| Cfh                                          | complement component factor h                           | [2]         |
| Cfl1                                         | cofilin 1, non-muscle                                   | [3]         |
| Chchd6                                       | coiled-coil-helix-coiled-coil-helix domain containing 6 | [2]         |
| Chdh                                         | choline dehydrogenase                                   | [2]         |
| Chit1                                        | chitinase 1 (chitotriosidase)                           | [1]         |
| Cisd1                                        | CDGSH iron sulfur domain 1                              | [2]         |
| Ckb                                          | creatine kinase, brain                                  | [3]         |
| Ckm                                          | creatine kinase, muscle                                 | [3]         |
| Clca1                                        | chloride channel calcium activated 1                    | [1]         |
| Clca2                                        | chloride channel calcium activated 2                    | [1]         |
| Clic1                                        | chloride intracellular channel 1                        | [3]         |
| Clmn                                         | calmin                                                  | [2]         |
| Cltc                                         | clathrin, heavy polypeptide (Hc)                        | [2]         |
| Clu                                          | clusterin                                               | [1],[2],[3] |
| Cmpk1                                        | cytidine monophosphate (UMP-CMP) kinase 1               | [2]         |
| Cnn1                                         | calponin 1                                              | [3]         |
| Coil                                         | coilin                                                  | [2]         |
| Col8a2                                       | collagen, type VIII, alpha 2                            | [2]         |
| Commd10                                      | COMM domain containing 10                               | [2]         |
| Copb1                                        | coatamer protein complex, subunit beta 1                | [3]         |
| Cotl1                                        | coactosin-like 1 (Dictyostelium)                        | [3]         |
| Cox4i1                                       | cytochrome c oxidase subunit IV isoform 1               | [2]         |
| Cox5a                                        | cytochrome c oxidase, subunit Va                        | [2]         |
| Cox6b2                                       | cytochrome c oxidase subunit VIb polypeptide 2          | [2]         |
| Cox6c                                        | cytochrome c oxidase, subunit VIc                       | [2]         |
| Cox7a2                                       | cytochrome c oxidase, subunit VIIa 2                    | [2]         |
| Cox7a2l                                      | cytochrome c oxidase subunit VIIa polypeptide 2-like    | [2]         |
| Cp                                           | ceruloplasmin                                           | [3]         |
| Cpa5                                         | carboxypeptidase A5                                     | [1],[2]     |
| Cpt1b                                        | carnitine palmitoyltransferase 1b, muscle               | [2]         |
| Cpt2                                         | carnitine palmitoyltransferase 2                        | [2]         |

| Proteins from previous mouse sperm proteomes |                                                            |           |
|----------------------------------------------|------------------------------------------------------------|-----------|
| Protein Symbol                               | Protein Name                                               | Reference |
| Cpvl                                         | carboxypeptidase, vitellogenic-like                        | [1]       |
| Crat                                         | carnitine acetyltransferase                                | [2]       |
| Crisp1                                       | cysteine-rich secretory protein 1                          | [2],[3]   |
| Cryl1                                        | crystallin, lambda 1                                       | [2]       |
| Cryz1                                        | crystallin, zeta (quinone reductase)-like 1                | [2]       |
| Cs                                           | citrate synthase                                           | [2],[3]   |
| Csl                                          | citrate synthase like                                      | [2],[3]   |
| Csnk1a1                                      | casein kinase 1, alpha 1                                   | [2]       |
| Csnk2a2                                      | casein kinase 2, alpha prime polypeptide                   | [2]       |
| Csnk2b                                       | casein kinase 2, beta polypeptide                          | [2]       |
| Csrp1                                        | cysteine and glycine-rich protein 1                        | [3]       |
| Cubn                                         | cubilin (intrinsic factor-cobalamin receptor)              | [2]       |
| Cul3                                         | cullin 3                                                   | [2]       |
| Cutc                                         | cutC copper transporter homolog (E.coli)                   | [2]       |
| Cuzd1                                        | CUB and zona pellucida-like domains 1                      | [1],[2]   |
| Cwf19l1                                      | CWF19-like 1, cell cycle control (S. pombe)                | [2]       |
| Cyb5                                         | cytochrome b-5                                             | [3]       |
| Cyb5b                                        | cytochrome b5 type B                                       | [2]       |
| Cyc1                                         | cytochrome c-1                                             | [2]       |
| Cycs                                         | cytochrome c, somatic                                      | [2]       |
| Cyct                                         | cytochrome c, testis                                       | [2]       |
| Cylc1                                        | cylicin, basic protein of sperm head cytoskeleton 1        | [2]       |
| Cylc2                                        | cylicin, basic protein of sperm head cytoskeleton 2        | [2]       |
| D10Jhu81e                                    | DNA segment, Chr 10, Johns Hopkins University 81 expressed | [2]       |
| D11Wsu47e                                    | DNA segment, Chr 11, Wayne State University 47, expressed  | [2]       |
| D230040A04Rik                                | RIKEN cDNA D230040A04 gene                                 | [2]       |
| Dak                                          | dihydroxyacetone kinase 2 homolog (yeast)                  | [2]       |
| Dbil5                                        | diazepam binding inhibitor-like 5                          | [3]       |
| Ddt                                          | D-dopachrome tautomerase                                   | [2],[3]   |
| Dhrs1                                        | dehydrogenase/reductase (SDR family) member 1              | [2]       |
| Dhrs4                                        | dehydrogenase/reductase (SDR family) member 4              | [2]       |
| Dhrs7b                                       | dehydrogenase/reductase (SDR family) member 7B             | [2]       |
| Dhx29                                        | DEAH (Asp-Glu-Ala-His) box polypeptide 29                  | [2]       |
| Disc1                                        | disrupted in schizophrenia 1                               | [2]       |

| Proteins from previous mouse sperm proteomes |                                                                                           |             |
|----------------------------------------------|-------------------------------------------------------------------------------------------|-------------|
| Protein Symbol                               | Protein Name                                                                              | Reference   |
| Dlat                                         | dihydrolipoamide S-acetyltransferase (E2 component of pyruvate dehydrogenase complex)     | [2],[3]     |
| Dld                                          | dihydrolipoamide dehydrogenase                                                            | [2]         |
| Dlst                                         | dihydrolipoamide S-succinyltransferase (E2 component of 2-oxo-glutarate complex)          | [2]         |
| Dmc1                                         | DMC1 dosage suppressor of mck1 homolog, meiosis-specific homologous recombination (yeast) | [2]         |
| Dmxl2                                        | Dmx-like 2                                                                                | [2]         |
| Dnahc1                                       | dynein, axonemal, heavy chain 1                                                           | [2]         |
| Dnahc10                                      | dynein, axonemal, heavy chain 10                                                          | [2]         |
| Dnahc17                                      | dynein, axonemal, heavy chain 17                                                          | [2]         |
| Dnahc2                                       | dynein, axonemal, heavy chain 2                                                           | [2]         |
| Dnahc3                                       | dynein, axonemal, heavy chain 3                                                           | [2]         |
| Dnahc5                                       | dynein, axonemal, heavy chain 5                                                           | [2]         |
| Dnahc6                                       | dynein, axonemal, heavy chain 6                                                           | [2]         |
| Dnahc7a                                      | dynein, axonemal, heavy chain 7A                                                          | [2]         |
| Dnahc7b                                      | dynein, axonemal, heavy chain 7B                                                          | [2]         |
| Dnahc7l                                      | dynein, axonemal, heavy chain 12                                                          | [2]         |
| Dnahc8                                       | dynein, axonemal, heavy chain 8                                                           | [2]         |
| Dnahc9                                       | dynein, axonemal, heavy chain 9                                                           | [2]         |
| Dnaic1                                       | dynein, axonemal, intermediate chain 1                                                    | [2]         |
| Dnaic2                                       | dynein, axonemal, intermediate chain 2                                                    | [2]         |
| Dnaja4                                       | DnaJ (Hsp40) homolog, subfamily A, member 4                                               | [2]         |
| Dnajb11                                      | DnaJ (Hsp40) homolog, subfamily B, member 11                                              | [2]         |
| Dnajb13                                      | DnaJ (Hsp40) related, subfamily B, member 13                                              | [2]         |
| Dnajb3                                       | DnaJ (Hsp40) homolog, subfamily B, member 3                                               | [2]         |
| Dnajb6                                       | DnaJ (Hsp40) homolog, subfamily B, member 6                                               | [2]         |
| Dnajc11                                      | DnaJ (Hsp40) homolog, subfamily C, member 11                                              | [2]         |
| Dnali1                                       | dynein, axonemal, light intermediate polypeptide 1                                        | [2]         |
| Dnpep                                        | aspartyl aminopeptidase                                                                   | [2],[3]     |
| Dock11                                       | dedicator of cytokinesis 11                                                               | [2]         |
| Dpep3                                        | dipeptidase 3                                                                             | [1],[2],[3] |
| Dpp3                                         | dipeptidylpeptidase 3                                                                     | [2]         |
| Drd2                                         | dopamine receptor 2                                                                       | [2]         |
| Dsg1c                                        | desmoglein 1 gamma                                                                        | [2]         |
| Dstn                                         | destrin                                                                                   | [3]         |
| Dynll1                                       | dynein light chain LC8-type 1                                                             | [2]         |

| Proteins from previous mouse sperm proteomes |                                                                                        |           |
|----------------------------------------------|----------------------------------------------------------------------------------------|-----------|
| Protein Symbol                               | Protein Name                                                                           | Reference |
| Dynlt1                                       | dynein light chain Tctex-type 1D                                                       | [2]       |
| E130112L23Rik                                | RIKEN cDNA E130112L23 gene                                                             | [2]       |
| E430028B21Rik                                | phosphodiesterase 12                                                                   | [2]       |
| Eef1a1                                       | eukaryotic translation elongation factor 1 alpha 1                                     | [2],[3]   |
| Eef1d                                        | eukaryotic translation elongation factor 1 delta (guanine nucleotide exchange protein) | [3]       |
| Eef1g                                        | eukaryotic translation elongation factor 1 gamma                                       | [2]       |
| Efcab3                                       | EF-hand calcium binding domain 3                                                       | [2]       |
| Efhb                                         | EF hand domain family, member B                                                        | [2]       |
| Efhc1                                        | EF-hand domain (C-terminal) containing 1                                               | [2]       |
| Efhc2                                        | EF-hand domain (C-terminal) containing 2                                               | [2]       |
| EG433182                                     | predicted gene 5506                                                                    | [3]       |
| Eif2ak4                                      | eukaryotic translation initiation factor 2 alpha kinase 4                              | [2]       |
| Elmo3                                        | engulfment and cell motility 3, ced-12 homolog (C. elegans)                            | [2]       |
| Enah                                         | enabled homolog (Drosophila)                                                           | [2]       |
| Enkur                                        | enkurin, TRPC channel interacting protein                                              | [2]       |
| Eno1                                         | enolase 1, alpha non-neuron                                                            | [2],[3]   |
| Eno2                                         | enolase 2, gamma neuronal                                                              | [2]       |
| Eno3                                         | enolase 3, beta muscle                                                                 | [2]       |
| Enpp5                                        | ectonucleotide pyrophosphatase/phosphodiesterase 5                                     | [1]       |
| Eprs                                         | glutamyl-prolyl-tRNA synthetase                                                        | [2]       |
| Erc6                                         | excision repair cross-complementing rodent repair deficiency, complementation group 6  | [2]       |
| Ergic1                                       | endoplasmic reticulum-golgi intermediate compartment (ERGIC) 1                         | [3]       |
| Erlin2                                       | ER lipid raft associated 2                                                             | [2]       |
| Es1                                          | esterase 1                                                                             | [3]       |
| Etf                                          | electron transferring flavoprotein, alpha polypeptide                                  | [2]       |
| Etfdh                                        | electron transferring flavoprotein, dehydrogenase                                      | [2]       |
| Fabp4                                        | fatty acid binding protein 4, adipocyte                                                | [3]       |
| Fabp9                                        | fatty acid binding protein 9, testis                                                   | [2],[3]   |
| Fahd2a                                       | fumarylacetoacetate hydrolase domain containing 2A                                     | [2]       |
| Fam154a                                      | family with sequence similarity 154, member A                                          | [2]       |
| Fam166a                                      | family with sequence similarity 166, member A                                          | [2]       |
| Fam170b                                      | family with sequence similarity 170, member B                                          | [2]       |
| Fam178a                                      | family with sequence similarity 178, member A                                          | [2]       |
| Fam71a                                       | family with sequence similarity 71, member A                                           | [2]       |

| Proteins from previous mouse sperm proteomes |                                                                                      |           |
|----------------------------------------------|--------------------------------------------------------------------------------------|-----------|
| Protein Symbol                               | Protein Name                                                                         | Reference |
| Fam71b                                       | family with sequence similarity 71, member B                                         | [2],[3]   |
| Fam78a                                       | family with sequence similarity 78, member A                                         | [2]       |
| Fank1                                        | fibronectin type 3 and ankyrin repeat domains 1                                      | [2]       |
| Fbn1                                         | fibrillin 1                                                                          | [2]       |
| Fbp1                                         | fructose biphosphatase 1                                                             | [2]       |
| Fdx1l                                        | ferredoxin 1-like                                                                    | [2]       |
| Fgd1                                         | FYVE, RhoGEF and PH domain containing 1                                              | [3]       |
| Fh1                                          | fumarate hydratase 1                                                                 | [2]       |
| fh15                                         |                                                                                      | [2]       |
| Fhl4                                         | four and a half LIM domains 4                                                        | [2]       |
| Fis1                                         | fission 1 (mitochondrial outer membrane) homolog (yeast)                             | [2]       |
| Fn1                                          | fibronectin 1                                                                        | [1]       |
| Fndc3a                                       | fibronectin type III domain containing 3A                                            | [2]       |
| Fndc8                                        | fibronectin type III domain containing 8                                             | [2]       |
| Foxo3                                        | forkhead box O3                                                                      | [2]       |
| Frmd4a                                       | FERM domain containing 4A                                                            | [2]       |
| Fscb                                         | fibrous sheath CABYR binding protein                                                 | [2]       |
| Fscn3                                        | fascin homolog 3, actin-bundling protein, testicular (Strongylocentrotus purpuratus) | [2]       |
| Fsip2                                        | fibrous sheath-interacting protein 2                                                 | [2]       |
| Ftmt                                         | ferritin mitochondrial                                                               | [2]       |
| Fxn                                          | frataxin                                                                             | [2]       |
| G6pd2                                        | glucose-6-phosphate dehydrogenase 2                                                  | [2]       |
| Ganab                                        | alpha glucosidase 2 alpha neutral subunit                                            | [1]       |
| Gapdh                                        | glyceraldehyde-3-phosphate dehydrogenase                                             | [3]       |
| Gapdhs                                       | glyceraldehyde-3-phosphate dehydrogenase, spermatogenic                              | [3]       |
| Gas8                                         | growth arrest specific 8                                                             | [2]       |
| Gc                                           | group specific component                                                             | [3]       |
| Gcc2                                         | GRIP and coiled-coil domain containing 2                                             | [2]       |
| Gdi2                                         | guanosine diphosphate (GDP) dissociation inhibitor 2                                 | [3]       |
| Gfap                                         | glial fibrillary acidic protein                                                      | [2]       |
| Gk2                                          | glycerol kinase 2                                                                    | [2]       |
| Glb1l                                        | galactosidase, beta 1-like                                                           | [1]       |
| Glcci1                                       | glucocorticoid induced transcript 1                                                  | [2]       |
| glg1                                         | golgi apparatus protein 1                                                            | [2]       |

| Proteins from previous mouse sperm proteomes |                                                   |           |
|----------------------------------------------|---------------------------------------------------|-----------|
| Protein Symbol                               | Protein Name                                      | Reference |
| Glpr111                                      | GLI pathogenesis-related 1 like 1                 | [2]       |
| Glpr112                                      | GLI pathogenesis-related 1 like 2                 | [2]       |
| Glud1                                        | glutamate dehydrogenase 1                         | [2]       |
| Glul                                         | glutamate-ammonia ligase (glutamine synthetase)   | [2]       |
| Gm128                                        | predicted gene 128                                | [2]       |
| Gm1281                                       |                                                   | [2]       |
| Gm13334                                      | predicted gene 13334                              | [2]       |
| Gm136                                        | predicted gene 136                                | [2]       |
| Gm166                                        | predicted gene 166                                | [2]       |
| Gm1673                                       | predicted gene 1673                               | [2]       |
| Gm3336                                       | predicted gene 3336                               | [2]       |
| Gm4535                                       | predicted gene 4535                               | [2]       |
| Gm46                                         | predicted gene 46                                 | [1],[2]   |
| Gm4764                                       | predicted gene 4764                               | [2]       |
| Gm595                                        | predicted gene 595                                | [2]       |
| Gm6316                                       | predicted gene 6316                               | [2]       |
| Gm6413                                       | predicted gene 6413                               | [2]       |
| Gm6981                                       | predicted gene 6981                               | [2]       |
| Gm8394                                       | predicted gene 8394                               | [2]       |
| Gm884                                        | predicted gene 884                                | [2]       |
| Gm9047                                       | predicted gene 9047                               | [2]       |
| Gm9832                                       | predicted gene 9832                               | [2]       |
| Gnpda1                                       | glucosamine-6-phosphate deaminase 1               | [2]       |
| Gnpda2                                       | glucosamine-6-phosphate deaminase 2               | [2]       |
| Gpd1                                         | glycerol-3-phosphate dehydrogenase 1 (soluble)    | [2]       |
| gpd2                                         | glycerol phosphate dehydrogenase 2, mitochondrial | [2]       |
| Gpi1                                         | glucose phosphate isomerase 1                     | [2],[3]   |
| Gpx3                                         | glutathione peroxidase 3                          | [1],[2]   |
| Gpx4                                         | glutathione peroxidase 4                          | [2],[3]   |
| Gpx5                                         | glutathione peroxidase 5                          | [1],[3]   |
| Gsn                                          | gelsolin                                          | [3]       |
| Gstm1                                        | glutathione S-transferase, mu 1                   | [3]       |
| Gstm2                                        | glutathione S-transferase, mu 2                   | [3]       |
| Gstm5                                        | glutathione S-transferase, mu 5                   | [2],[3]   |

| Proteins from previous mouse sperm proteomes |                                                                                                                                       |           |
|----------------------------------------------|---------------------------------------------------------------------------------------------------------------------------------------|-----------|
| Protein Symbol                               | Protein Name                                                                                                                          | Reference |
| Gsto1                                        | glutathione S-transferase omega 1                                                                                                     | [2]       |
| Gsto2                                        | glutathione S-transferase omega 2                                                                                                     | [2]       |
| Gstp1                                        | glycerol kinase-like 1                                                                                                                | [3]       |
| Gstt2                                        | glutathione S-transferase, theta 2                                                                                                    | [2]       |
| Gstt3                                        | glutathione S-transferase, theta 3                                                                                                    | [2]       |
| Gtl3                                         | gene trap locus 3                                                                                                                     | [2]       |
| Gyk                                          | glycerol kinase                                                                                                                       | [2]       |
| Gykl1                                        | glycerol kinase-like 1                                                                                                                | [2],[3]   |
| H2-Ke6                                       | H2-K region expressed gene 6                                                                                                          | [2]       |
| Hadha                                        | hydroxyacyl-Coenzyme A dehydrogenase/3-ketoacyl-Coenzyme A thiolase/enoyl-Coenzyme A hydratase (trifunctional protein), alpha subunit | [2]       |
| Hadhb                                        | hydroxyacyl-Coenzyme A dehydrogenase/3-ketoacyl-Coenzyme A thiolase/enoyl-Coenzyme A hydratase (trifunctional protein), beta subunit  | [2]       |
| Hba-a1                                       | hemoglobin alpha, adult chain 1                                                                                                       | [2],[3]   |
| Hba-a2                                       | hemoglobin, beta adult major chain                                                                                                    | [3]       |
| Hbb-b1                                       | hemoglobin, beta adult major chain                                                                                                    | [2],[3]   |
| Hbb-b2                                       | hexokinase 1                                                                                                                          | [3]       |
| Hc                                           | hemolytic complement                                                                                                                  | [2]       |
| Hdac1                                        | histone deacetylase 1                                                                                                                 | [2]       |
| Hdhd1a                                       | haloacid dehalogenase-like hydrolase domain containing 1A                                                                             | [2]       |
| Hdhd3                                        | haloacid dehalogenase-like hydrolase domain containing 3                                                                              | [2]       |
| Heatr7a                                      | HEAT repeat containing 7A                                                                                                             | [2]       |
| Heatr7b2                                     | XVHEAT repeat family member 7B2                                                                                                       | [2]       |
| Hibadh                                       | 3-hydroxyisobutyrate dehydrogenase                                                                                                    | [2]       |
| Hibch                                        | 3-hydroxyisobutyryl-Coenzyme A hydrolase                                                                                              | [2]       |
| Hint1                                        | histidine triad nucleotide binding protein 1                                                                                          | [2]       |
| Hira                                         | histone cell cycle regulation defective homolog A ( <i>S. cerevisiae</i> )                                                            | [2]       |
| Hist1h1t                                     | histone cluster 1, H1t                                                                                                                | [2]       |
| Hist1h2ba                                    | histone cluster 1, H2ba                                                                                                               | [2]       |
| Hist1h4i                                     | histone cluster 1, H4i                                                                                                                | [2]       |
| Hk1                                          | hexokinase 1                                                                                                                          | [2],[3]   |
| Hk2                                          | hexokinase 2                                                                                                                          | [2]       |
| Hkdc1                                        | hexokinase domain containing 1                                                                                                        | [2]       |
| Hmox2                                        | heme oxygenase (decycling) 2                                                                                                          | [2]       |

| Proteins from previous mouse sperm proteomes |                                                                    |             |
|----------------------------------------------|--------------------------------------------------------------------|-------------|
| Protein Symbol                               | Protein Name                                                       | Reference   |
| Hnrnpu                                       | heterogeneous nuclear ribonucleoprotein U                          | [2]         |
| Hnrpa2b1                                     | hypoxanthine guanine phosphoribosyl transferase 1                  | [3]         |
| Hprt1                                        | hemopexin                                                          | [3]         |
| Hpx                                          | heat shock protein 90 alpha (cytosolic), class B member 1          | [3]         |
| Hsd17b10                                     | hydroxysteroid (17-beta) dehydrogenase 10                          | [2]         |
| Hsp90aa1                                     | heat shock protein 90, alpha (cytosolic), class A member 1         | [2]         |
| Hsp90ab1                                     | heat shock protein 90 alpha (cytosolic), class B member 1          | [2],[3]     |
| Hsp90b1                                      | heat shock protein 90, beta (Grp94), member 1                      | [1],[2]     |
| Hspa1b                                       | heat shock protein 5                                               | [3]         |
| Hspa1l                                       | heat shock protein 1-like                                          | [2]         |
| Hspa2                                        | heat shock protein 2                                               | [2]         |
| Hspa4l                                       | heat shock protein 4 like                                          | [2]         |
| Hspa5                                        | heat shock protein 5                                               | [1],[2],[3] |
| Hspa8                                        | heat shock protein 8                                               | [2],[3]     |
| Hspa9                                        | heat shock protein 9                                               | [2]         |
| Hspb9                                        | heat shock protein, alpha-crystallin-related, B9                   | [2]         |
| Hspbp1                                       | HSPA (heat shock 70kDa) binding protein, cytoplasmic cochaperone 1 | [2]         |
| Hspd1                                        | heat shock protein 1 (chaperonin)                                  | [2]         |
| Htra2                                        | HtrA serine peptidase 2                                            | [2]         |
| Htt                                          | huntingtin                                                         | [2]         |
| Hyal5                                        | hyaluronoglucosaminidase 5                                         | [1],[2]     |
| Hydin                                        | hydrocephalus inducing                                             | [2]         |
| Hyou1                                        | hypoxia up-regulated 1                                             | [1]         |
| Idh1                                         | isocitrate dehydrogenase 1 (NADP+), soluble                        | [2],[3]     |
| Idh3a                                        | isocitrate dehydrogenase 3 (NAD+) alpha                            | [2]         |
| Idh3b                                        | isocitrate dehydrogenase 3 (NAD+) beta                             | [2]         |
| Igfbp1b                                      | immunoglobulin (CD79A) binding protein 1b                          | [2]         |
| Ighg1                                        | keratin 1                                                          | [3]         |
| Il4i1                                        | interleukin 4 induced 1                                            | [1]         |
| Immt                                         | inner membrane protein, mitochondrial                              | [2]         |
| Impa1                                        | inositol (myo)-1(or 4)-monophosphatase 1                           | [2]         |
| Ing4                                         | inhibitor of growth family, member 4                               | [2]         |
| Inpp5a                                       | inositol polyphosphate-5-phosphatase A                             | [2]         |
| Iqcd                                         | IQ motif containing D                                              | [2]         |



| Proteins from previous mouse sperm proteomes |                                                           |           |
|----------------------------------------------|-----------------------------------------------------------|-----------|
| Protein Symbol                               | Protein Name                                              | Reference |
| Iqcf5                                        | IQ motif containing F5                                    | [2]       |
| Irgc1                                        | immunity-related GTPase family, cinema 1                  | [2]       |
| Isoc2a                                       | isochorismatase domain containing 2a                      | [2]       |
| Isyna1                                       | myo-inositol 1-phosphate synthase A1                      | [2]       |
| Itga5                                        | integrin alpha 5 (fibronectin receptor alpha)             | [1]       |
| Itgb2                                        | integrin beta 2                                           | [1]       |
| Itpr2                                        | inositol 1,4,5-triphosphate receptor 2                    | [2]       |
| Izumo1                                       | izumo sperm-egg fusion 1                                  | [1],[2]   |
| Kcnk4                                        | potassium channel, subfamily K, member 4                  | [2]       |
| Kif24                                        | kinesin family member 24                                  | [2]       |
| Kif9                                         | kinesin family member 9                                   | [2]       |
| Klhl10                                       | kelch-like 10 (Drosophila)                                | [2]       |
| Kndc1                                        | kinase non-catalytic C-lobe domain (KIND) containing 1    | [2]       |
| Krt1                                         | keratin 1                                                 | [2],[3]   |
| Krt10                                        | keratin 10                                                | [2]       |
| Krt19                                        | keratin 19                                                | [2]       |
| Krt2                                         | keratin 2                                                 | [2]       |
| Krt24                                        | keratin 24                                                | [2]       |
| Krt79                                        | keratin 79                                                | [2],[3]   |
| Krt8                                         | keratin 8                                                 | [3]       |
| Krt81                                        | keratin 81                                                | [2]       |
| Krt85                                        | keratin 85                                                | [2]       |
| L2hgdh                                       | L-2-hydroxyglutarate dehydrogenase                        | [2]       |
| Lamb1-1                                      | laminin B1 subunit 1                                      | [2]       |
| Lamb2                                        | laminin, beta 2                                           | [2]       |
| Lap3                                         | leucine aminopeptidase 3                                  | [2]       |
| Lcn5                                         | lipocalin 5                                               | [2],[3]   |
| Ldha                                         | lactate dehydrogenase A-like 6B                           | [3]       |
| Ldhal6b                                      | lactate dehydrogenase C                                   | [3]       |
| Ldhb                                         | lactate dehydrogenase B                                   | [2]       |
| Ldhc                                         | lactate dehydrogenase C                                   | [2],[3]   |
| Letm1                                        | leucine zipper-EF-hand containing transmembrane protein 1 | [2]       |
| Lipe                                         | lipase, hormone sensitive                                 | [2]       |
| Lman2                                        | lectin, mannose-binding 2                                 | [1]       |

| Proteins from previous mouse sperm proteomes |                                                                     |           |
|----------------------------------------------|---------------------------------------------------------------------|-----------|
| Protein Symbol                               | Protein Name                                                        | Reference |
| Lpp                                          | LIM domain containing preferred translocation partner in lipoma     | [2]       |
| Lrch3                                        | leucine-rich repeats and calponin homology (CH) domain containing 3 | [2]       |
| Lrguk                                        | leucine-rich repeats and guanylate kinase domain containing         | [2]       |
| Lrrc18                                       | leucine rich repeat containing 18                                   | [2]       |
| Lrrc24                                       | leucine rich repeat containing 24                                   | [2]       |
| Lrrc34                                       | leucine rich repeat containing 34                                   | [2]       |
| Lrrc37a                                      | leucine rich repeat containing 37A                                  | [1]       |
| Lrrc57                                       | leucine rich repeat containing 57                                   | [2]       |
| Lrrc7                                        | leucine rich repeat containing 7                                    | [2]       |
| Lta4h                                        | leukotriene A4 hydrolase                                            | [2]       |
| Ltb4dh                                       | leukotriene B4 dehydrogenase                                        | [3]       |
| Ltf                                          | lactotransferrin                                                    | [3]       |
| Lum                                          | lumican                                                             | [3]       |
| Luzp1                                        | leucine zipper protein 1                                            | [2]       |
| Ly6g5b                                       | lymphocyte antigen 6 complex, locus G5B                             | [2]       |
| Lypd4                                        | Ly6/Plaur domain containing 4                                       | [2]       |
| Lypla1                                       | lysophospholipase 1                                                 | [2]       |
| Lyz1                                         | lysozyme-like 1                                                     | [2]       |
| Lyz6                                         | lysozyme-like 6                                                     | [1]       |
| M6pr                                         | mannose-6-phosphate receptor, cation dependent                      | [1]       |
| Macf1                                        | microtubule-actin crosslinking factor 1                             | [2]       |
| Man2b2                                       | mannosidase 2, alpha B2                                             | [1],[2]   |
| Man2c1                                       | mannosidase, alpha, class 2C, member 1                              | [1],[2]   |
| Mdh1                                         | mucin 5, subtype B, tracheobronchial                                | [3]       |
| Mdh2                                         | malate dehydrogenase 2, NAD (mitochondrial)                         | [2]       |
| Mdn1                                         | midasin homolog (yeast)                                             | [2]       |
| Me1                                          | malic enzyme 1, NADP(+)-dependent, cytosolic                        | [2]       |
| Me2                                          | malic enzyme 2, NAD(+)-dependent, mitochondrial                     | [2]       |
| Mecr                                         | mitochondrial trans-2-enoyl-CoA reductase                           | [2]       |
| Mfge8                                        | milk fat globule-EGF factor 8 protein                               | [1]       |
| Mink1                                        | misshapen-like kinase 1 (zebrafish)                                 | [2]       |
| Mipol1                                       | mirror-image polydactyly gene 1 homolog (human)                     | [2]       |
| Mll2                                         | myeloid/lymphoid or mixed-lineage leukemia 2                        | [2]       |
| Mme1                                         | membrane metallo-endopeptidase-like 1                               | [1]       |

| Proteins from previous mouse sperm proteomes |                                                                   |           |
|----------------------------------------------|-------------------------------------------------------------------|-----------|
| Protein Symbol                               | Protein Name                                                      | Reference |
| Mns1                                         | meiosis-specific nuclear structural protein 1                     | [2]       |
| Mpi                                          | mannose phosphate isomerase                                       | [2]       |
| Mrps36                                       | mitochondrial ribosomal protein S36                               | [2]       |
| Ms4a14                                       | membrane-spanning 4-domains, subfamily A, member 14               | [2]       |
| Mtap1a                                       | microtubule-associated protein 1 A                                | [2]       |
| Mtch2                                        | mitochondrial carrier homolog 2 (C. elegans)                      | [2]       |
| Mtx2                                         | metaxin 2                                                         | [2]       |
| Muc5                                         | murinoglobulin 1                                                  | [3]       |
| Mug1                                         | myosin, heavy polypeptide 10, non-muscle                          | [3]       |
| Mybl2                                        | myeloblastosis oncogene-like 2                                    | [2]       |
| Myh10                                        | myosin, heavy polypeptide 11, smooth muscle                       | [3]       |
| Myh11                                        | myosin, heavy polypeptide 9, non-muscle                           | [3]       |
| Myh9                                         | myosin, light polypeptide 6, alkali, smooth muscle and non-muscle | [3]       |
| Myl6                                         | myosin, light polypeptide 9, regulatory                           | [3]       |
| Myl9                                         | myosin, light chain 12B, regulatory                               | [3]       |
| Mylc2b                                       | myosin, light polypeptide kinase                                  | [3]       |
| Mylk                                         | myosin IB                                                         | [3]       |
| Myo1b                                        | family with sequence similarity 129, member A                     | [3]       |
| Nagk                                         | N-acetylglucosamine kinase                                        | [2]       |
| Naglu                                        | alpha-N-acetylglucosaminidase (Sanfilippo disease IIIB)           | [1],[2]   |
| Ndufa10                                      | NADH dehydrogenase (ubiquinone) 1 alpha subcomplex 10             | [2]       |
| Ndufa11                                      | NADH dehydrogenase (ubiquinone) 1 alpha subcomplex 11             | [2]       |
| Ndufa12                                      | NADH dehydrogenase (ubiquinone) 1 alpha subcomplex, 12            | [2]       |
| Ndufa13                                      | NADH dehydrogenase (ubiquinone) 1 alpha subcomplex, 13            | [2]       |
| Ndufa2                                       | NADH dehydrogenase (ubiquinone) 1 alpha subcomplex, 2             | [2]       |
| Ndufa5                                       | NADH dehydrogenase (ubiquinone) 1 alpha subcomplex, 5             | [2]       |
| Ndufa6                                       | NADH dehydrogenase (ubiquinone) 1 alpha subcomplex, 6 (B14)       | [2]       |
| Ndufa7                                       | NADH dehydrogenase (ubiquinone) 1 alpha subcomplex, 7 (B14.5a)    | [2]       |
| Ndufa8                                       | NADH dehydrogenase (ubiquinone) 1 alpha subcomplex, 8             | [2]       |
| Ndufa9                                       | NADH dehydrogenase (ubiquinone) 1 alpha subcomplex, 9             | [2]       |
| Ndufab1                                      | NADH dehydrogenase (ubiquinone) 1, alpha/beta subcomplex, 1       | [2]       |
| Ndufb10                                      | NADH dehydrogenase (ubiquinone) 1 beta subcomplex, 10             | [2]       |

| Proteins from previous mouse sperm proteomes |                                                                              |           |
|----------------------------------------------|------------------------------------------------------------------------------|-----------|
| Protein Symbol                               | Protein Name                                                                 | Reference |
| Ndufb4                                       | NADH dehydrogenase (ubiquinone) 1 beta subcomplex 4                          | [2]       |
| Ndufb5                                       | NADH dehydrogenase (ubiquinone) 1 beta subcomplex, 5                         | [2]       |
| Ndufb7                                       | NADH dehydrogenase (ubiquinone) 1 beta subcomplex, 7                         | [2]       |
| Ndufc2                                       | NADH dehydrogenase (ubiquinone) 1, subcomplex unknown, 2                     | [2]       |
| Ndufs1                                       | NADH dehydrogenase (ubiquinone) Fe-S protein 1                               | [2]       |
| Ndufs2                                       | NADH dehydrogenase (ubiquinone) Fe-S protein 2                               | [2]       |
| Ndufs3                                       | NADH dehydrogenase (ubiquinone) Fe-S protein 3                               | [2]       |
| Ndufs4                                       | NADH dehydrogenase (ubiquinone) Fe-S protein 4                               | [2]       |
| Ndufs5                                       | NADH dehydrogenase (ubiquinone) Fe-S protein 5                               | [2]       |
| Ndufs6                                       | NADH dehydrogenase (ubiquinone) Fe-S protein 6                               | [2]       |
| Ndufs7                                       | NADH dehydrogenase (ubiquinone) Fe-S protein 7                               | [2]       |
| Ndufv1                                       | NADH dehydrogenase (ubiquinone) flavoprotein 1                               | [2]       |
| Ndufv2                                       | NADH dehydrogenase (ubiquinone) flavoprotein 2                               | [2]       |
| Nfs1                                         | nitrogen fixation gene 1 ( <i>S. cerevisiae</i> )                            | [2]       |
| Nhlrc1                                       | NHL repeat containing 1                                                      | [2]       |
| Niban                                        | non-metastatic cells 2, protein (NM23B) expressed in                         | [3]       |
| Nipbl                                        | Nipped-B homolog ( <i>Drosophila</i> )                                       | [2]       |
| Nipsnap3a                                    | nipsnap homolog 3A ( <i>C. elegans</i> )                                     | [2]       |
| Nme2                                         | non-metastatic cells 2, protein (NM23B) expressed in                         | [2],[3]   |
| Nme5                                         | non-metastatic cells 5, protein expressed in (nucleoside-diphosphate kinase) | [2]       |
| Nme7                                         | non-metastatic cells 7, protein expressed in (nucleoside-diphosphate kinase) | [2]       |
| Nsf                                          | N-ethylmaleimide sensitive fusion protein                                    | [2]       |
| Nt5c1b                                       | 5'-nucleotidase, cytosolic IB                                                | [2]       |
| Nup153                                       | nucleoporin 153                                                              | [2]       |
| Nup210l                                      | nucleoporin 210-like                                                         | [2]       |
| Nup54                                        | nucleoporin 54                                                               | [2]       |
| Odf1                                         | outer dense fiber of sperm tails 1                                           | [2]       |
| Odf2                                         | outer dense fiber of sperm tails 2                                           | [2],[3]   |
| Odf3                                         | outer dense fiber of sperm tails 3                                           | [2]       |
| Ogdh                                         | oxoglutarate dehydrogenase (lipoamide)                                       | [2]       |
| Ogdhl                                        | oxoglutarate dehydrogenase-like                                              | [2]       |
| Olf1r504                                     | olfactory receptor 504                                                       | [2]       |
| Olf1r905                                     | olfactory receptor 905                                                       | [2]       |
| Oplah                                        | 5-oxoprolinase (ATP-hydrolysing)                                             | [2]       |

| Proteins from previous mouse sperm proteomes |                                                              |           |
|----------------------------------------------|--------------------------------------------------------------|-----------|
| Protein Symbol                               | Protein Name                                                 | Reference |
| OTTMUSG00000005300                           | predicted gene 12070                                         | [3]       |
| Oxct2a                                       | 3-oxoacid CoA transferase 2A                                 | [3]       |
| Oxct2b                                       | 3-oxoacid CoA transferase 2B                                 | [2],[3]   |
| P4hb                                         | prolyl 4-hydroxylase, beta polypeptide                       | [1],[3]   |
| Pacrg                                        | PARK2 co-regulated                                           | [2]       |
| Park7                                        | Parkinson disease (autosomal recessive, early onset) 7       | [2]       |
| Pcdh7                                        | protocadherin 7                                              | [2]       |
| Pclo                                         | piccolo (presynaptic cytomatrix protein)                     | [2]       |
| Pcmt1                                        | protein-L-isoaspartate (D-aspartate) O-methyltransferase 1   | [2]       |
| Pcp4                                         | Purkinje cell protein 4                                      | [3]       |
| Pcsk6                                        | proprotein convertase subtilisin/kexin type 6                | [2]       |
| Pcx                                          | pyruvate carboxylase                                         | [2]       |
| Pcyox1                                       | prenylcysteine oxidase 1                                     | [1]       |
| Pde1b                                        | phosphodiesterase 1B, Ca <sup>2+</sup> -calmodulin dependent | [2]       |
| Pdha1                                        | pyruvate dehydrogenase E1 alpha 1                            | [2]       |
| Pdha2                                        | pyruvate dehydrogenase E1 alpha 2                            | [2],[3]   |
| Pdhb                                         | pyruvate dehydrogenase (lipoamide) beta                      | [2],[3]   |
| Pdhx                                         | pyruvate dehydrogenase complex, component X                  | [2]       |
| Pdia3                                        | protein disulfide isomerase associated 3                     | [1],[3]   |
| Pdia4                                        | protein disulfide isomerase associated 4                     | [1],[2]   |
| Pdia6                                        | protein disulfide isomerase associated 6                     | [1],[3]   |
| Pdpk1                                        | 3-phosphoinositide dependent protein kinase-1                | [2]       |
| Pdzk1                                        | PDZ domain containing 1                                      | [2]       |
| Pebp1                                        | phosphatidylethanolamine binding protein 1                   | [2],[3]   |
| Pfkm                                         | phosphofructokinase, muscle                                  | [2]       |
| Pfkp                                         | phosphofructokinase, platelet                                | [2]       |
| Pfn1                                         | profilin 1                                                   | [3]       |
| Pfn3                                         | profilin 3                                                   | [2]       |
| Pgam1                                        | phosphoglycerate mutase 1                                    | [3]       |
| Pgam2                                        | phosphoglycerate mutase 2                                    | [2],[3]   |
| Pgcp                                         | plasma glutamate carboxypeptidase                            | [1]       |
| Pgd                                          | phosphogluconate dehydrogenase                               | [2]       |
| Pgk1                                         | phosphoglycerate kinase 1                                    | [3]       |
| Pgk2                                         | phosphoglycerate kinase 2                                    | [2],[3]   |

| Proteins from previous mouse sperm proteomes |                                                                                     |             |
|----------------------------------------------|-------------------------------------------------------------------------------------|-------------|
| Protein Symbol                               | Protein Name                                                                        | Reference   |
| Pgrmc1                                       | progesterone receptor membrane component 1                                          | [1],[2]     |
| Pgs1                                         | phosphatidylglycerophosphate synthase 1                                             | [2]         |
| Phb                                          | prohibitin                                                                          | [2]         |
| Phb2                                         | prohibitin 2                                                                        | [2]         |
| Phospho1                                     | phosphatase, orphan 1                                                               | [2]         |
| Pik3r3                                       | phosphatidylinositol 3 kinase, regulatory subunit, polypeptide 3 (p55)              | [2]         |
| Pik3r4                                       | phosphatidylinositol 3 kinase, regulatory subunit, polypeptide 4, p150              | [2]         |
| Pitrm1                                       | pitrilysin metallepetidase 1                                                        | [2]         |
| Pkm2                                         | pyruvate kinase, muscle                                                             | [2],[3]     |
| Plb1                                         | phospholipase B1                                                                    | [1],[2]     |
| Plbd1                                        | phospholipase B domain containing 1                                                 | [1],[2],[3] |
| Plg                                          | plasminogen                                                                         | [3]         |
| Pls3                                         | plastin 3 (T-isoform)                                                               | [3]         |
| Pnpla7                                       | patatin-like phospholipase domain containing 7                                      | [2]         |
| Ppap2a                                       | phosphatidic acid phosphatase type 2A                                               | [1],[2]     |
| Ppia                                         | peptidylprolyl isomerase A                                                          | [3]         |
| Ppm1b                                        | protein phosphatase 1B, magnesium dependent, beta isoform                           | [2]         |
| Ppp1cc                                       | protein phosphatase 1, catalytic subunit, gamma isoform                             | [2],[3]     |
| Ppp1r11                                      | protein phosphatase 1, regulatory (inhibitor) subunit 11                            | [2]         |
| Ppp1r7                                       | protein phosphatase 1, regulatory (inhibitor) subunit 7                             | [2]         |
| Ppp2r1a                                      | protein phosphatase 2 (formerly 2A), regulatory subunit A (PR 65), alpha isoform    | [2]         |
| Ppp3cc                                       | protein phosphatase 3, catalytic subunit, gamma isoform                             | [2]         |
| Ppp3r2                                       | protein phosphatase 3, regulatory subunit B, alpha isoform (calcineurin B, type II) | [2]         |
| Ppp6c                                        | protein phosphatase 6, catalytic subunit                                            | [2]         |
| Prcp                                         | prolylcarboxypeptidase (angiotensinase C)                                           | [1],[2]     |
| Prdx1                                        | peroxiredoxin 1                                                                     | [3]         |
| Prdx2                                        | peroxiredoxin 2                                                                     | [3]         |
| Prdx5                                        | peroxiredoxin 5                                                                     | [2],[3]     |
| Prdx6                                        | peroxiredoxin 6                                                                     | [2],[3]     |
| Prdx6-rs1                                    | peroxiredoxin 6, related sequence 1                                                 | [2]         |
| Prkaca                                       | protein kinase, cAMP dependent, catalytic, alpha                                    | [2]         |
| Prkar1a                                      | protein kinase, cAMP dependent regulatory, type I, alpha                            | [2]         |
| Prkar2a                                      | protein kinase, cAMP dependent regulatory, type II alpha                            | [2],[3]     |

| Proteins from previous mouse sperm proteomes |                                                                                                            |           |
|----------------------------------------------|------------------------------------------------------------------------------------------------------------|-----------|
| Protein Symbol                               | Protein Name                                                                                               | Reference |
| Prkcsh                                       | protein kinase C substrate 80K-H                                                                           | [1],[3]   |
| Prkrir                                       | protein-kinase, interferon-inducible double stranded RNA dependent inhibitor, repressor of (P58 repressor) | [2]       |
| Prm2                                         | protamine 2                                                                                                | [2]       |
| Prom1                                        | prominin 1                                                                                                 | [1]       |
| Prpsap2                                      | phosphoribosyl pyrophosphate synthetase-associated protein 2                                               | [2]       |
| Prss21                                       | protease, serine, 21                                                                                       | [1]       |
| Prss32                                       | protease, serine, 32                                                                                       | [2]       |
| Psip1                                        | PC4 and SFRS1 interacting protein 1                                                                        | [2]       |
| Psma1                                        | proteasome (prosome, macropain) subunit, alpha type 1                                                      | [2]       |
| Psma2                                        | proteasome (prosome, macropain) subunit, alpha type 2                                                      | [2]       |
| Psma3                                        | proteasome (prosome, macropain) subunit, alpha type 3                                                      | [2]       |
| Psma5                                        | proteasome (prosome, macropain) subunit, alpha type 5                                                      | [2]       |
| Psma6                                        | proteasome (prosome, macropain) subunit, alpha type 6                                                      | [2]       |
| Psma8                                        | proteasome (prosome, macropain) subunit, alpha type, 8                                                     | [2]       |
| Psemb1                                       | proteasome (prosome, macropain) subunit, beta type 1                                                       | [2]       |
| Psemb2                                       | proteasome (prosome, macropain) subunit, beta type 2                                                       | [2]       |
| Psemb3                                       | proteasome (prosome, macropain) subunit, beta type 3                                                       | [2]       |
| Psemb4                                       | proteasome (prosome, macropain) subunit, beta type 4                                                       | [2]       |
| Psemb5                                       | proteasome (prosome, macropain) subunit, beta type 5                                                       | [2]       |
| Psemb6                                       | proteasome (prosome, macropain) subunit, beta type 6                                                       | [2]       |
| Psemb7                                       | proteasome (prosome, macropain) subunit, beta type 7                                                       | [2]       |
| Psmc1                                        | protease (prosome, macropain) 26S subunit, ATPase 1                                                        | [2]       |
| Psmc2                                        | proteasome (prosome, macropain) 26S subunit, ATPase 2                                                      | [2]       |
| Psmc3                                        | proteasome (prosome, macropain) 26S subunit, ATPase 3                                                      | [2]       |
| Psmc4                                        | proteasome (prosome, macropain) 26S subunit, ATPase, 4                                                     | [2]       |
| Psmc5                                        | protease (prosome, macropain) 26S subunit, ATPase 5                                                        | [2]       |
| Psmc6                                        | proteasome (prosome, macropain) 26S subunit, ATPase, 6                                                     | [2]       |
| Psmc1                                        | proteasome (prosome, macropain) 26S subunit, non-ATPase, 1                                                 | [2]       |
| Psmc11                                       | proteasome (prosome, macropain) 26S subunit, non-ATPase, 11                                                | [2]       |
| Psmc13                                       | proteasome (prosome, macropain) 26S subunit, non-ATPase, 13                                                | [2]       |
| Psmc14                                       | proteasome (prosome, macropain) 26S subunit, non-ATPase, 14                                                | [2]       |
| Psmc2                                        | proteasome (prosome, macropain) 26S subunit, non-ATPase, 2                                                 | [2]       |
| Psmc3                                        | proteasome (prosome, macropain) 26S subunit, non-ATPase, 3                                                 | [2]       |
| Psmc6                                        | proteasome (prosome, macropain) 26S subunit, non-ATPase, 6                                                 | [2]       |

| Proteins from previous mouse sperm proteomes |                                                              |           |
|----------------------------------------------|--------------------------------------------------------------|-----------|
| Protein Symbol                               | Protein Name                                                 | Reference |
| Psmid7                                       | proteasome (prosome, macropain) 26S subunit, non-ATPase, 7   | [2]       |
| Psmid8                                       | proteasome (prosome, macropain) 26S subunit, non-ATPase, 8   | [2]       |
| Psme1                                        | proteasome (prosome, macropain) 28 subunit, alpha            | [3]       |
| Ptchd3                                       | patched domain containing 3                                  | [1],[2]   |
| Ptgds                                        | prostaglandin D2 synthase (brain)                            | [3]       |
| ptgs1                                        | prostaglandin-endoperoxide synthase 1                        | [1],[3]   |
| Ptgs2                                        | prostaglandin-endoperoxide synthase 2                        | [3]       |
| Pthr2                                        | peptidyl-tRNA hydrolase 2                                    | [2]       |
| Pvr13                                        | poliovirus receptor-related 3                                | [2]       |
| Pzp                                          | pregnancy zone protein                                       | [3]       |
| Qsox1                                        | quiescin Q6 sulfhydryl oxidase 1                             | [1],[3]   |
| Rab10                                        | RAB10, member RAS oncogene family                            | [3]       |
| Rab11b                                       | RAB11B, member RAS oncogene family                           | [2]       |
| Rab14                                        | RAB14, member RAS oncogene family                            | [2]       |
| Rab22a                                       | RAB22A, member RAS oncogene family                           | [2]       |
| Rab2a                                        | RAB2A, member RAS oncogene family                            | [2]       |
| Rab3gap2                                     | RAB3 GTPase activating protein subunit 2                     | [2]       |
| Rab5c                                        | RAB5C, member RAS oncogene family                            | [2]       |
| Rab8a                                        | RAB8A, member RAS oncogene family                            | [2]       |
| Rab8b                                        | RAB8B, member RAS oncogene family                            | [2]       |
| Rabggtb                                      | RAB geranylgeranyl transferase, b subunit                    | [2]       |
| Rad17                                        | RAD17 homolog (S. pombe)                                     | [2]       |
| Rae1                                         | RAE1 RNA export 1 homolog (S. pombe)                         | [2]       |
| Rala                                         | v-ral simian leukemia viral oncogene homolog A (ras related) | [2]       |
| Rangrf                                       | RAN guanine nucleotide release factor                        | [2]       |
| Rbm12                                        | RNA binding motif protein 12                                 | [2]       |
| Rcn1                                         | reticulocalbin 1                                             | [3]       |
| Reep6                                        | receptor accessory protein 6                                 | [2]       |
| Rfx7                                         | regulatory factor X, 7                                       | [2]       |
| Rgs22                                        | regulator of G-protein signalling 22                         | [2]       |
| Ribc2                                        | RIB43A domain with coiled-coils 2                            | [2]       |
| Rif1                                         | Rap1 interacting factor 1 homolog (yeast)                    | [2]       |
| Rnls                                         | renalase, FAD-dependent amine oxidase                        | [2]       |
| Ropn1                                        | ropporin, rhophilin associated protein 1                     | [2],[3]   |



| Proteins from previous mouse sperm proteomes |                                                                                 |             |
|----------------------------------------------|---------------------------------------------------------------------------------|-------------|
| Protein Symbol                               | Protein Name                                                                    | Reference   |
| Ropn1l                                       | ropporin 1-like                                                                 | [2]         |
| Rpn1                                         | ribophorin I                                                                    | [1]         |
| Rpn2                                         | ribophorin II                                                                   | [1]         |
| Rprml                                        | reprimo-like                                                                    | [2]         |
| Rps27a                                       | ribosomal protein S27A                                                          | [3]         |
| Rrbp1                                        | ribosome binding protein 1                                                      | [1]         |
| Rsh1                                         | radial spokehead-like 1                                                         | [2]         |
| Rsh12b                                       | radial spokehead-like 2B                                                        | [2]         |
| Rsph1                                        | radial spoke head 1 homolog (Chlamydomonas)                                     | [2]         |
| Rsph9                                        | radial spoke head 9 homolog (Chlamydomonas)                                     | [2]         |
| Rtdr1                                        | rhabdoid tumor deletion region gene 1                                           | [2]         |
| S100a6                                       | S100 calcium binding protein A6 (calcyclin)                                     | [3]         |
| Sacm1l                                       | SAC1 (suppressor of actin mutations 1, homolog)-like (S. cerevisiae)            | [1]         |
| Samm50                                       | sorting and assembly machinery component 50 homolog (S. cerevisiae)             | [2]         |
| Satl1                                        | spermidine/spermine N1-acetyl transferase-like 1                                | [2]         |
| Scamp1                                       | secretory carrier membrane protein 1                                            | [2]         |
| Scamp2                                       | secretory carrier membrane protein 2                                            | [1],[2]     |
| Sccpdh                                       | saccharopine dehydrogenase (putative)                                           | [1],[2],[3] |
| Scnn1b                                       | sodium channel, nonvoltage-gated 1 beta                                         | [2]         |
| Sdccag8                                      | serologically defined colon cancer antigen 8                                    | [2]         |
| Sdha                                         | succinate dehydrogenase complex, subunit A, flavoprotein (Fp)                   | [2],[3]     |
| Sdhb                                         | succinate dehydrogenase complex, subunit B, iron sulfur (Ip)                    | [2]         |
| Sdhd                                         | succinate dehydrogenase complex, subunit D, integral membrane protein           | [2]         |
| Sema6b                                       | sema domain, transmembrane domain (TM), and cytoplasmic domain, (semaphorin) 6B | [2]         |
| Senp8                                        | SUMO/sentrin specific peptidase 8                                               | [2]         |
| Sept4                                        | septin 4                                                                        | [2]         |
| Sept7                                        | septin 7                                                                        | [2]         |
| Serpina1a                                    | serine (or cysteine) peptidase inhibitor, clade A, member 1A                    | [3]         |
| Serpina1b                                    | serine (or cysteine) peptidase inhibitor, clade A, member 1B                    | [1],[3]     |
| Serpina1d                                    | serine (or cysteine) peptidase inhibitor, clade A, member 1D                    | [3]         |
| Serpina1e                                    | serine (or cysteine) peptidase inhibitor, clade A, member 1E                    | [1],[3]     |
| Serpina1f                                    | serine (or cysteine) peptidase inhibitor, clade A, member 1F                    | [1],[2],[3] |
| Serpina3k                                    | serine (or cysteine) peptidase inhibitor, clade A, member 3K                    | [1],[3]     |
| Serpina5                                     | serine (or cysteine) peptidase inhibitor, clade A, member 5                     | [2]         |

| Proteins from previous mouse sperm proteomes |                                                                                              |             |
|----------------------------------------------|----------------------------------------------------------------------------------------------|-------------|
| Protein Symbol                               | Protein Name                                                                                 | Reference   |
| Serpinb6a                                    | serine (or cysteine) peptidase inhibitor, clade B, member 6a                                 | [2]         |
| Sgta                                         | small glutamine-rich tetratricopeptide repeat (TPR)-containing, alpha                        | [2]         |
| Sh3bgrl                                      | SH3-binding domain glutamic acid-rich protein like                                           | [3]         |
| Shmt1                                        | serine hydroxymethyltransferase 1 (soluble)                                                  | [2]         |
| Skiv2l                                       | superkiller viralicidic activity 2-like ( <i>S. cerevisiae</i> )                             | [2]         |
| Slc16a7                                      | solute carrier family 16 (monocarboxylic acid transporters), member 7                        | [1],[2]     |
| Slc22a21                                     | solute carrier family 22 (organic cation transporter), member 21                             | [1]         |
| Slc22a5                                      | solute carrier family 22 (organic cation transporter), member 5                              | [1]         |
| Slc25a10                                     | solute carrier family 25 (mitochondrial carrier, dicarboxylate transporter), member 10       | [2]         |
| Slc25a3                                      | solute carrier family 25 (mitochondrial carrier, phosphate carrier), member 3                | [2]         |
| Slc25a31                                     | solute carrier family 25 (mitochondrial carrier; adenine nucleotide translocator), member 31 | [2],[3]     |
| Slc25a4                                      | solute carrier family 25 (mitochondrial carrier, adenine nucleotide translocator), member 4  | [2]         |
| Slc26a8                                      | solute carrier family 26, member 8                                                           | [1]         |
| Slc2a3                                       | solute carrier family 2 (facilitated glucose transporter), member 3                          | [1],[2],[3] |
| Slc2a5                                       | solute carrier family 2 (facilitated glucose transporter), member 5                          | [1],[2]     |
| Smcp                                         | sperm mitochondria-associated cysteine-rich protein                                          | [2]         |
| Sod1                                         | superoxide dismutase 1, soluble                                                              | [2],[3]     |
| Sod2                                         | superoxide dismutase 2, mitochondrial                                                        | [2]         |
| Sord                                         | sorbitol dehydrogenase                                                                       | [2],[3]     |
| Sort1                                        | sortilin 1                                                                                   | [1]         |
| Spa17                                        | sperm autoantigenic protein 17                                                               | [2]         |
| Spaca1                                       | sperm acrosome associated 1                                                                  | [1],[2]     |
| Spaca3                                       | sperm acrosome associated 3                                                                  | [2]         |
| Spaca5                                       | sperm acrosome associated 5                                                                  | [2]         |
| Spag16                                       | sperm associated antigen 16                                                                  | [2]         |
| Spag17                                       | sperm associated antigen 17                                                                  | [2]         |
| Spag6                                        | sperm associated antigen 6                                                                   | [2]         |
| Spam1                                        | sperm adhesion molecule 1                                                                    | [2]         |
| Spata18                                      | spermatogenesis associated 18                                                                | [2]         |
| Spata19                                      | spermatogenesis associated 19                                                                | [2]         |
| Spata6                                       | spermatogenesis associated 6                                                                 | [2]         |
| Spatc1                                       | spermatogenesis and centriole associated 1                                                   | [2]         |
| Spcs2                                        | signal peptidase complex subunit 2 homolog ( <i>S. cerevisiae</i> )                          | [1]         |

| Proteins from previous mouse sperm proteomes |                                                                  |           |
|----------------------------------------------|------------------------------------------------------------------|-----------|
| Protein Symbol                               | Protein Name                                                     | Reference |
| Spesp1                                       | sperm equatorial segment protein 1                               | [1],[2]   |
| Spg20                                        | spastic paraplegia 20, spartin (Troyer syndrome) homolog (human) | [2]       |
| Spink5                                       | serine peptidase inhibitor, Kazal type 5                         | [3]       |
| Spnb2                                        | spectrin beta 2                                                  | [2]       |
| Sqrdl                                        | sulfide quinone reductase-like (yeast)                           | [2]       |
| Srpk2                                        | serine/arginine-rich protein specific kinase 2                   | [2]       |
| Srpk3                                        | serine/arginine-rich protein specific kinase 3                   | [2]       |
| Ssna1                                        | Sjogren's syndrome nuclear autoantigen 1                         | [2]       |
| St13                                         | suppression of tumorigenicity 13                                 | [2]       |
| Stard6                                       | StAR-related lipid transfer (START) domain containing 6          | [2]       |
| Stub1                                        | STIP1 homology and U-Box containing protein 1                    | [2]       |
| Stxbp3a                                      | syntaxin binding protein 3A                                      | [2]       |
| Sucla2                                       | succinate-Coenzyme A ligase, ADP-forming, beta subunit           | [2],[3]   |
| Suclg1                                       | succinate-CoA ligase, GDP-forming, alpha subunit                 | [2],[3]   |
| Suox                                         | sulfite oxidase                                                  | [2]       |
| Syt12                                        | synaptotagmin-like 2                                             | [2]       |
| Tagln                                        | transgelin                                                       | [3]       |
| Tagln2                                       | transgelin 2                                                     | [3]       |
| Tbc1d17                                      | TBC1 domain family, member 17                                    | [2]       |
| Tbc1d20                                      | TBC1 domain family, member 20                                    | [2]       |
| Tbl1x                                        | transducin (beta)-like 1 X-linked                                | [2]       |
| Tbl2                                         | transducin (beta)-like 2                                         | [2]       |
| Tcp1                                         | t-complex protein 1                                              | [2]       |
| Tekt1                                        | tektin 1                                                         | [2]       |
| Tekt2                                        | tektin 2                                                         | [2]       |
| Tekt3                                        | tektin 3                                                         | [2]       |
| Tekt4                                        | tektin 4                                                         | [2]       |
| Tekt5                                        | tektin 5                                                         | [2]       |
| Tepp                                         | testis, prostate and placenta expressed                          | [2]       |
| Tex101                                       | testis expressed gene 101                                        | [2]       |
| Thap4                                        | THAP domain containing 4                                         | [2]       |
| Theg                                         | testicular haploid expressed gene                                | [2]       |
| Them4                                        | thioesterase superfamily member 4                                | [2]       |
| Thns1                                        | threonine synthase-like 1 (bacterial)                            | [2]       |

| Proteins from previous mouse sperm proteomes |                                                                    |           |
|----------------------------------------------|--------------------------------------------------------------------|-----------|
| Protein Symbol                               | Protein Name                                                       | Reference |
| Timm44                                       | translocase of inner mitochondrial membrane 44                     | [2]       |
| Timm50                                       | translocase of inner mitochondrial membrane 50 homolog (yeast)     | [2]       |
| Tkt                                          | transketolase                                                      | [3]       |
| Tmed10                                       | transmembrane emp24-like trafficking protein 10 (yeast)            | [2]       |
| Tmem146                                      | transmembrane protein 146                                          | [2]       |
| Tmem147                                      | transmembrane protein 147                                          | [2]       |
| Tmem177                                      | transmembrane protein 177                                          | [2]       |
| Tmem190                                      | transmembrane protein 190                                          | [1],[2]   |
| Tmem30a                                      | transmembrane protein 30A                                          | [2]       |
| Tnr                                          | tenascin R                                                         | [2]       |
| Tomm22                                       | translocase of outer mitochondrial membrane 22 homolog (yeast)     | [2]       |
| Tomm40                                       | translocase of outer mitochondrial membrane 40 homolog (yeast)     | [2]       |
| Tpi1                                         | triosephosphate isomerase 1                                        | [2],[3]   |
| Tpm1                                         | tropomyosin 1, alpha                                               | [3]       |
| Tpm3                                         | tropomyosin 3, gamma                                               | [3]       |
| Tpp2                                         | tripeptidyl peptidase II                                           | [2]       |
| Trappc6b                                     | trafficking protein particle complex 6B                            | [2]       |
| Trf                                          | transferrin                                                        | [3]       |
| Trpc3                                        | transient receptor potential cation channel, subfamily C, member 3 | [2]       |
| try10                                        | trypsin 10                                                         | [3]       |
| Tsga10                                       | testis specific 10                                                 | [2]       |
| Tsp50                                        | testes-specific protease 50                                        | [1]       |
| Tssk1                                        | testis-specific serine kinase 1                                    | [2]       |
| Tssk4                                        | testis-specific serine kinase 4                                    | [2]       |
| Tssk6                                        | testis-specific serine kinase 6                                    | [2]       |
| Ttc25                                        | tetratricopeptide repeat domain 25                                 | [2]       |
| Ttc39d                                       | tetratricopeptide repeat domain 39D                                | [2]       |
| Ttc8                                         | tetratricopeptide repeat domain 8                                  | [2]       |
| Ttn                                          | titin                                                              | [2]       |
| Ttr                                          | transthyretin                                                      | [3]       |
| Tuba1a                                       | tubulin, alpha 1A                                                  | [2],[3]   |
| Tuba1b                                       | tubulin, alpha 1B                                                  | [3]       |
| Tuba1c                                       | tubulin, alpha 1C                                                  | [3]       |
| Tuba3a                                       | tubulin, alpha 3A                                                  | [3]       |

| Proteins from previous mouse sperm proteomes |                                                                    |           |
|----------------------------------------------|--------------------------------------------------------------------|-----------|
| Protein Symbol                               | Protein Name                                                       | Reference |
| Tuba3b                                       | tubulin, alpha 3B                                                  | [2],[3]   |
| Tubb2b                                       | tubulin, beta 2B                                                   | [2]       |
| Tubb2c                                       | tubulin, beta 2C                                                   | [2],[3]   |
| Tubb3                                        | tubulin, beta 3                                                    | [2]       |
| Tubb4                                        | tubulin, beta 4                                                    | [2]       |
| Txndc3                                       | thioredoxin domain containing 3 (spermatzoa)                       | [2]       |
| Uba52                                        | ubiquitin A-52 residue ribosomal protein fusion product 1          | [2]       |
| Uba6                                         | ubiquitin-like modifier activating enzyme 6                        | [2]       |
| Ubb                                          | ubiquitin B                                                        | [3]       |
| Ube1x                                        | ubiquitin-like modifier activating enzyme 1                        | [2],[3]   |
| Ube2v2                                       | ubiquitin-conjugating enzyme E2 variant 2                          | [2]       |
| Ubqln1                                       | ubiquilin 1                                                        | [2]       |
| Ubt2                                         | ubiquitin domain containing 2                                      | [2]       |
| Ubxn11                                       | UBX domain protein 11                                              | [2]       |
| Ubxn8                                        | UBX domain protein 8                                               | [2]       |
| Uchl1                                        | ubiquitin carboxy-terminal hydrolase L1                            | [2]       |
| Uchl3                                        | ubiquitin carboxyl-terminal esterase L3 (ubiquitin thiolesterase)  | [2]       |
| Uchl4                                        | ubiquitin carboxyl-terminal esterase L4                            | [2]       |
| Uchl5                                        | ubiquitin carboxyl-terminal esterase L5                            | [2]       |
| Ugcgl1                                       | UDP-glucose glycoprotein glucosyltransferase 1                     | [1],[3]   |
| Ugp2                                         | UDP-glucose pyrophosphorylase 2                                    | [2]       |
| Uqcr                                         | ubiquinol-cytochrome c reductase (6.4kD) subunit                   | [2]       |
| Uqcrb                                        | ubiquinol-cytochrome c reductase binding protein                   | [2]       |
| Uqcrc1                                       | ubiquinol-cytochrome c reductase core protein 1                    | [2]       |
| Uqcrc2                                       | ubiquinol cytochrome c reductase core protein 2                    | [2]       |
| Uqcrfs1                                      | ubiquinol-cytochrome c reductase, Rieske iron-sulfur polypeptide 1 | [2]       |
| Uqcrq                                        | ubiquinol-cytochrome c reductase, complex III subunit VII          | [2]       |
| Usp4                                         | ubiquitin specific peptidase 4 (proto-oncogene)                    | [2]       |
| Usp7                                         | ubiquitin specific peptidase 7                                     | [2]       |
| Vamp3                                        | vesicle-associated membrane protein 3                              | [2]       |
| Vapa                                         | vesicle-associated membrane protein, associated protein A          | [2]       |
| Vcl                                          | vinculin                                                           | [3]       |
| Vcp                                          | valosin containing protein                                         | [2],[3]   |
| Vdac1                                        | voltage-dependent anion channel 1                                  | [2]       |

| Proteins from previous mouse sperm proteomes |                                                                                             |             |
|----------------------------------------------|---------------------------------------------------------------------------------------------|-------------|
| Protein Symbol                               | Protein Name                                                                                | Reference   |
| Vdac2                                        | voltage-dependent anion channel 2                                                           | [2]         |
| Vdac3                                        | voltage-dependent anion channel 3                                                           | [2]         |
| Vil2                                         | ezrin                                                                                       | [3]         |
| Vim                                          | vimentin                                                                                    | [3]         |
| Vps13a                                       | vacuolar protein sorting 13A (yeast)                                                        | [2]         |
| Wars                                         | tryptophanyl-tRNA synthetase                                                                | [3]         |
| Was                                          | Wiskott-Aldrich syndrome homolog (human)                                                    | [2]         |
| Wbp7                                         | WW domain binding protein 7                                                                 | [2]         |
| Wdr16                                        | WD repeat domain 16                                                                         | [2]         |
| Wdr49                                        | WD repeat domain 49                                                                         | [2]         |
| Wdr52                                        | WD repeat domain 52                                                                         | [2]         |
| Wdr64                                        | WD repeat domain 64                                                                         | [2]         |
| Wnk2                                         | WNK lysine deficient protein kinase 2                                                       | [2]         |
| Xpnpep1                                      | X-prolyl aminopeptidase (aminopeptidase P) 1, soluble                                       | [2]         |
| Xpo7                                         | exportin 7                                                                                  | [2]         |
| Ywhab                                        | tyrosine 3-monooxygenase/tryptophan 5-monooxygenase activation protein, beta polypeptide    | [2],[3]     |
| Ywhae                                        | tyrosine 3-monooxygenase/tryptophan 5-monooxygenase activation protein, epsilon polypeptide | [2],[3]     |
| Ywhaz                                        | tyrosine 3-monooxygenase/tryptophan 5-monooxygenase activation protein, zeta polypeptide    | [2],[3]     |
| Zan                                          | zonadhesin                                                                                  | [1],[2],[3] |
| Zfp112                                       | zinc finger protein 112                                                                     | [2]         |
| Zfp395                                       | zinc finger protein 395                                                                     | [2]         |
| Zfp407                                       | zinc finger protein 407                                                                     | [2]         |
| Zp3r                                         | zona pellucida 3 receptor                                                                   | [1],[2],[3] |
| Zpbp                                         | zona pellucida binding protein                                                              | [1],[2]     |
| Zpbp2                                        | zona pellucida binding protein 2                                                            | [1],[2]     |

References: [1] Stein et al. 2006, [2] Baker et al. 2008, [3] Dorus et al. 2010.

| <b>Additional proteins compiled in this study</b> |                                                                   |
|---------------------------------------------------|-------------------------------------------------------------------|
| <b>Protein Symbol</b>                             | <b>Protein Name</b>                                               |
| Acpp                                              | acid phosphatase, prostate                                        |
| Acrbp                                             | proacrosin binding protein                                        |
| Actg1                                             | actin, gamma, cytoplasmic 1                                       |
| Actg2                                             | actin, gamma 2, smooth muscle, enteric                            |
| Adad1                                             | adenosine deaminase domain containing 1 (testis specific)         |
| Adam15                                            | a disintegrin and metallopeptidase domain 15 (metargidin)         |
| Adam17                                            | a disintegrin and metallopeptidase domain 17                      |
| Adam18                                            | a disintegrin and metallopeptidase domain 18                      |
| Adam1a                                            | a disintegrin and metallopeptidase domain 1a                      |
| Adam1b                                            | a disintegrin and metallopeptidase domain 1b                      |
| Adam21                                            | a disintegrin and metallopeptidase domain 21                      |
| Adam23                                            | a disintegrin and metallopeptidase domain 23                      |
| Adam25                                            | a disintegrin and metallopeptidase domain 25 (testase 2)          |
| Adam26a                                           | a disintegrin and metallopeptidase domain 26A (testase 3)         |
| Adam28                                            | a disintegrin and metallopeptidase domain 28                      |
| Adam29                                            | a disintegrin and metallopeptidase domain 29                      |
| Adam32                                            | a disintegrin and metallopeptidase domain 32                      |
| Adam7                                             | a disintegrin and metallopeptidase domain 7                       |
| Adcy10                                            | adenylate cyclase 10                                              |
| Adcy3                                             | adenylate cyclase 3                                               |
| Adcy8                                             | adenylate cyclase 8                                               |
| Agfg1                                             | ArfGAP with FG repeats 1                                          |
| Agtbbp1                                           | ATP/GTP binding protein 1                                         |
| Akap1                                             | A kinase (PRKA) anchor protein 1                                  |
| Akap10                                            | A kinase (PRKA) anchor protein 10                                 |
| Akap11                                            | A kinase (PRKA) anchor protein 11                                 |
| Akap12                                            | A kinase (PRKA) anchor protein (gravin) 12                        |
| Akap8                                             | A kinase (PRKA) anchor protein 8                                  |
| Atm                                               | ataxia telangiectasia mutated homolog (human)                     |
| Atp2b4                                            | ATPase, Ca <sup>++</sup> transporting, plasma membrane 4          |
| B4galt1                                           | UDP-Gal:betaGlcNAc beta 1,4- galactosyltransferase, polypeptide 1 |
| Bag6                                              | BCL2-associated athanogene 6                                      |

| <b>Additional proteins compiled in this study</b> |                                                            |
|---------------------------------------------------|------------------------------------------------------------|
| <b>Protein Symbol</b>                             | <b>Protein Name</b>                                        |
| Bax                                               | BCL2-associated X protein                                  |
| Bbs2                                              | Bardet-Biedl syndrome 2 (human)                            |
| Bbs4                                              | Bardet-Biedl syndrome 4 (human)                            |
| BC100451                                          | cDNA sequence BC100451                                     |
| Boll                                              | bol, boule-like (Drosophila)                               |
| Bpnt1                                             | bisphosphate 3'-nucleotidase 1                             |
| Brs3                                              | bombesin-like receptor 3                                   |
| Cadm1                                             | cell adhesion molecule 1                                   |
| Calca                                             | calcitonin/calcitonin-related polypeptide, alpha           |
| Calcb                                             | calcitonin-related polypeptide, beta                       |
| Camk2b                                            | calcium/calmodulin-dependent protein kinase II, beta       |
| Camk2d                                            | calcium/calmodulin-dependent protein kinase II, delta      |
| Camp                                              | cathelicidin antimicrobial peptide                         |
| Catsper1                                          | cation channel, sperm associated 1                         |
| Catsper2                                          | cation channel, sperm associated 2                         |
| Catsper3                                          | cation channel, sperm associated 3                         |
| Catsperb                                          | catsper channel auxiliary subunit beta                     |
| Catsperd                                          | catsper channel auxiliary subunit delta                    |
| Catsperg2                                         | catsper channel auxiliary subunit gamma 2                  |
| Cav1                                              | caveolin 1, caveolae protein                               |
| Cav2                                              | caveolin 2                                                 |
| Cav3                                              | caveolin 3                                                 |
| Ccdc54                                            | coiled-coil domain containing 54                           |
| Ccna1                                             | cyclin A1                                                  |
| Ccnd1                                             | cyclin D1                                                  |
| Cd151                                             | CD151 antigen                                              |
| Cd52                                              | CD52 antigen                                               |
| Cd59a                                             | CD59a antigen                                              |
| Cd59b                                             | CD59b antigen                                              |
| Cdk2                                              | cyclin-dependent kinase 2                                  |
| Ceacam10                                          | carcinoembryonic antigen-related cell adhesion molecule 10 |
| Celf3                                             | CUGBP, Elav-like family member 3                           |
| Chrna7                                            | cholinergic receptor, nicotinic, alpha polypeptide 7       |
| Clgn                                              | calmegin                                                   |



| <b>Additional proteins compiled in this study</b> |                                                               |
|---------------------------------------------------|---------------------------------------------------------------|
| <b>Protein Symbol</b>                             | <b>Protein Name</b>                                           |
| Cnga3                                             | cyclic nucleotide gated channel alpha 3                       |
| Cngb1                                             | cyclic nucleotide gated channel beta 1                        |
| Cpeb1                                             | cytoplasmic polyadenylation element binding protein 1         |
| Creb3                                             | cAMP responsive element binding protein 3                     |
| Creb3l4                                           | cAMP responsive element binding protein 3-like 4              |
| Crisp1                                            | cysteine-rich secretory protein 1                             |
| Crisp2                                            | cysteine-rich secretory protein 2                             |
| Crisp3                                            | cysteine-rich secretory protein 3                             |
| Crisp4                                            | cysteine-rich secretory protein 4                             |
| Csk                                               | c-src tyrosine kinase                                         |
| Cst13                                             | cystatin 13                                                   |
| Cst8                                              | cystatin 8 (cystatin-related epididymal spermatogenic)        |
| Cstf2                                             | cleavage stimulation factor, 3' pre-RNA subunit 2             |
| Ctsd                                              | cathepsin D                                                   |
| Ctsl                                              | cathepsin L                                                   |
| Ctnn                                              | cortactin                                                     |
| D3Bwg0562e                                        | DNA segment, Chr 3, Brigham & Women's Genetics 0562 expressed |
| Dazap1                                            | DAZ associated protein 1                                      |
| Dazl                                              | deleted in azoospermia-like                                   |
| Dbi                                               | diazepam binding inhibitor                                    |
| Ddx25                                             | DEAD (Asp-Glu-Ala-Asp) box polypeptide 25                     |
| Ddx4                                              | DEAD (Asp-Glu-Ala-Asp) box polypeptide 4                      |
| Defb19                                            | defensin beta 19                                              |
| Defb22                                            | defensin beta 22                                              |
| Dffa                                              | DNA fragmentation factor, alpha subunit                       |
| Dkk1                                              | dickkopf-like 1                                               |
| Dnaaf1                                            | dynein, axonemal assembly factor 1                            |
| Dnahc1                                            | dynein, axonemal, heavy chain 1                               |
| Dnahc12                                           | dynein, axonemal, heavy chain 12                              |
| Dnahc17                                           | dynein, axonemal, heavy chain 17                              |
| Dnahc2                                            | dynein, axonemal, heavy chain 2                               |
| Dnahc3                                            | dynein, axonemal, heavy chain 3                               |
| Dnahc7a                                           | dynein, axonemal, heavy chain 7A                              |
| Dnaja1                                            | DnaJ (Hsp40) homolog, subfamily A, member 1                   |

| Additional proteins compiled in this study |                                                                                    |
|--------------------------------------------|------------------------------------------------------------------------------------|
| Protein Symbol                             | Protein Name                                                                       |
| Dnmt3l                                     | DNA (cytosine-5-)-methyltransferase 3-like                                         |
| Dock1                                      | dedicator of cytokinesis 1                                                         |
| Dpcd                                       | deleted in primary ciliary dyskinesia                                              |
| Dynlt1b                                    | dynein light chain Tctex-type 1B                                                   |
| Egfl7                                      | EGF-like domain 7                                                                  |
| Eif4g3                                     | eukaryotic translation initiation factor 4 gamma, 3                                |
| Eqtn                                       | equatorin, sperm acrosome associated                                               |
| Esx1                                       | extraembryonic, spermatogenesis, homeobox 1                                        |
| Etv5                                       | ets variant gene 5                                                                 |
| Fam65c                                     | family with sequence similarity 65, member C                                       |
| Fancl                                      | Fanconi anemia, complementation group L                                            |
| Fer                                        | fer (fms/fps related) protein kinase                                               |
| Fgfr1                                      | fibroblast growth factor receptor 1                                                |
| Fkbp10                                     | FK506 binding protein 10                                                           |
| Fkbp6                                      | FK506 binding protein 6                                                            |
| Fscn1                                      | fascin homolog 1, actin bundling protein (Strongylocentrotus purpuratus)           |
| Fyn                                        | Fyn proto-oncogene                                                                 |
| Gadd45a                                    | growth arrest and DNA-damage-inducible 45 alpha                                    |
| Galnt3                                     | UDP-N-acetyl-alpha-D-galactosamine:polypeptide N-acetylgalactosaminyltransferase 3 |
| Ggn                                        | gametogenetin                                                                      |
| Gira1                                      | glycine receptor, alpha 1 subunit                                                  |
| Gira2                                      | glycine receptor, alpha 2 subunit                                                  |
| Glrb                                       | glycine receptor, beta subunit                                                     |
| Gm5803                                     | predicted gene 5803                                                                |
| Gopc                                       | golgi associated PDZ and coiled-coil motif containing                              |
| Gsg1                                       | germ cell-specific gene 1                                                          |
| Gsk3b                                      | glycogen synthase kinase 3 beta                                                    |
| Gusb                                       | glucuronidase, beta                                                                |
| H1fnt                                      | H1 histone family, member N, testis-specific                                       |
| H2afx                                      | H2A histone family, member X                                                       |
| Hc                                         | hemolytic complement                                                               |
| Hils1                                      | histone H1-like protein in spermatids 1                                            |
| Hnrnpa1                                    | heterogeneous nuclear ribonucleoprotein A1                                         |

| <b>Additional proteins compiled in this study</b> |                                                                     |
|---------------------------------------------------|---------------------------------------------------------------------|
| <b>Protein Symbol</b>                             | <b>Protein Name</b>                                                 |
| Hsp90b1                                           | heat shock protein 90, beta (Grp94), member 1                       |
| Hspa1l                                            | heat shock protein 1-like                                           |
| Hyal3                                             | hyaluronoglucosaminidase 3                                          |
| Hyal6                                             | hyaluronoglucosaminidase 6                                          |
| Ier3                                              | immediate early response 3                                          |
| Ift88                                             | intraflagellar transport 88                                         |
| Igsf8                                             | immunoglobulin superfamily, member 8                                |
| Il5                                               | interleukin 5                                                       |
| Inpp5b                                            | inositol polyphosphate-5-phosphatase B                              |
| Insl6                                             | insulin-like 6                                                      |
| Itga3                                             | integrin alpha 3                                                    |
| Itga6                                             | integrin alpha 6                                                    |
| Itgb1                                             | integrin beta 1 (fibronectin receptor beta)                         |
| Itpr1                                             | inositol 1,4,5-trisphosphate receptor 1                             |
| Kcnu1                                             | potassium channel, subfamily U, member 1                            |
| Kdm3a                                             | lysine (K)-specific demethylase 3A                                  |
| Kdm5b                                             | lysine (K)-specific demethylase 5B                                  |
| Khdrbs1                                           | KH domain containing, RNA binding, signal transduction associated 1 |
| Kit                                               | kit oncogene                                                        |
| Klk1b27                                           | kallikrein 1-related peptidase b27                                  |
| Klkb1                                             | kallikrein B, plasma 1                                              |
| Krt9                                              | keratin 9                                                           |
| Lamb1                                             | laminin B1                                                          |
| Mast2                                             | microtubule associated serine/threonine kinase 2                    |
| Mcts2                                             | malignant T cell amplified sequence 2                               |
| Mei1                                              | meiosis defective 1                                                 |
| Meig1                                             | meiosis expressed gene 1                                            |
| Mfge8                                             | milk fat globule-EGF factor 8 protein                               |
| Mgea5                                             | meningioma expressed antigen 5 (hyaluronidase)                      |
| Mif4gd                                            | MIF4G domain containing                                             |
| Mkks                                              | McKusick-Kaufman syndrome                                           |
| Mlh1                                              | mutL homolog 1 (E. coli)                                            |
| Mlh3                                              | mutL homolog 3 (E coli)                                             |
| Mmp1a                                             | matrix metalloproteinase 1a (interstitial collagenase)              |

| Additional proteins compiled in this study |                                                                   |
|--------------------------------------------|-------------------------------------------------------------------|
| Protein Symbol                             | Protein Name                                                      |
| Ms4a13                                     | membrane-spanning 4-domains, subfamily A, member 13               |
| Msh4                                       | mutS homolog 4 (E. coli)                                          |
| Msh5                                       | mutS homolog 5 (E. coli)                                          |
| Msemb                                      | beta-microseminoprotein                                           |
| Nanos1                                     | nanos homolog 1 (Drosophila)                                      |
| Nanos2                                     | nanos homolog 2 (Drosophila)                                      |
| Nanos3                                     | nanos homolog 3 (Drosophila)                                      |
| Nckipsd                                    | NCK interacting protein with SH3 domain                           |
| Neu1                                       | neuraminidase 1                                                   |
| Neurl1a                                    | neuralized homolog 1A (Drosophila)                                |
| Nkx3-1                                     | NK-3 transcription factor, locus 1 (Drosophila)                   |
| Nme8                                       | NME/NM23 family member 8                                          |
| Npepps                                     | aminopeptidase puromycin sensitive                                |
| Nsun4                                      | NOL1/NOP2/Sun domain family, member 4                             |
| Nup214                                     | nucleoporin 214                                                   |
| Odf4                                       | outer dense fiber of sperm tails 4                                |
| Ovgp1                                      | oviductal glycoprotein 1                                          |
| Pafah1b1                                   | platelet-activating factor acetylhydrolase, isoform 1b, subunit 1 |
| Papolb                                     | poly (A) polymerase beta (testis specific)                        |
| Parg                                       | poly (ADP-ribose) glycohydrolase                                  |
| Park2                                      | Parkinson disease (autosomal recessive, juvenile) 2, parkin       |
| Parp1                                      | poly (ADP-ribose) polymerase family, member 1                     |
| Parp2                                      | poly (ADP-ribose) polymerase family, member 2                     |
| Pbp2                                       | phosphatidylethanolamine binding protein 2                        |
| Pcsk4                                      | proprotein convertase subtilisin/kexin type 4                     |
| Pde11a                                     | phosphodiesterase 11A                                             |
| Pde1a                                      | phosphodiesterase 1A, calmodulin-dependent                        |
| Pde4a                                      | phosphodiesterase 4A, cAMP specific                               |
| Pfkfb4                                     | 6-phosphofructo-2-kinase/fructose-2,6-biphosphatase 4             |
| Pfn4                                       | profilin family, member 4                                         |
| Pgrmc2                                     | progesterone receptor membrane component 2                        |
| Phf1                                       | PHD finger protein 1                                              |
| Pick1                                      | protein interacting with C kinase 1                               |

| Additional proteins compiled in this study |                                                                                                   |
|--------------------------------------------|---------------------------------------------------------------------------------------------------|
| Protein Symbol                             | Protein Name                                                                                      |
| Pik3ca                                     | phosphatidylinositol 3-kinase, catalytic, alpha polypeptide                                       |
| Pik3cb                                     | phosphatidylinositol 3-kinase, catalytic, beta polypeptide                                        |
| Pik3cd                                     | phosphatidylinositol 3-kinase catalytic delta polypeptide                                         |
| Pik3cg                                     | phosphoinositide-3-kinase, catalytic, gamma polypeptide                                           |
| Pik3r1                                     | phosphatidylinositol 3-kinase, regulatory subunit, polypeptide 1 (p85 alpha)                      |
| Pip                                        | prolactin induced protein                                                                         |
| Piwi1                                      | piwi-like RNA-mediated gene silencing 1                                                           |
| Piwi2                                      | piwi-like RNA-mediated gene silencing 2                                                           |
| Piwi4                                      | piwi-like RNA-mediated gene silencing 4                                                           |
| Pkdrej                                     | polycystic kidney disease (polycystin) and REJ (sperm receptor for egg jelly homolog, sea urchin) |
| Pla2g1b                                    | phospholipase A2, group IB, pancreas                                                              |
| Plag1                                      | pleiomorphic adenoma gene 1                                                                       |
| Plau                                       | plasminogen activator, urokinase                                                                  |
| Plcd4                                      | phospholipase C, delta 4                                                                          |
| Plekha5                                    | pleckstrin homology domain containing, family A member 5                                          |
| Plscr1                                     | phospholipid scramblase 1                                                                         |
| Plscr4                                     | phospholipid scramblase 4                                                                         |
| Pmfbp1                                     | polyamine modulated factor 1 binding protein 1                                                    |
| Pms2                                       | postmeiotic segregation increased 2 ( <i>S. cerevisiae</i> )                                      |
| Ppp1r11                                    | protein phosphatase 1, regulatory (inhibitor) subunit 11                                          |
| Prdm6                                      | PR domain containing 6                                                                            |
| Prdx6b                                     | peroxiredoxin 6B                                                                                  |
| Prkcg                                      | protein kinase C, gamma                                                                           |
| Prm1                                       | protamine 1                                                                                       |
| Pros1                                      | protein S (alpha)                                                                                 |
| Prrt2                                      | proline-rich transmembrane protein 2                                                              |
| Psat1                                      | phosphoserine aminotransferase 1                                                                  |
| Psmc3ip                                    | proteasome (prosome, macropain) 26S subunit, ATPase 3, interacting protein                        |
| Ptk2b                                      | PTK2 protein tyrosine kinase 2 beta                                                               |
| Ptpn1                                      | protein tyrosine phosphatase, non-receptor type 1                                                 |
| Pvrl2                                      | poliovirus receptor-related 2                                                                     |
| Rab3a                                      | RAB3A, member RAS oncogene family                                                                 |
| Rapgef3                                    | Rap guanine nucleotide exchange factor (GEF) 3                                                    |
| Rapgef4                                    | Rap guanine nucleotide exchange factor (GEF) 4                                                    |

| <b>Additional proteins compiled in this study</b> |                                                                                   |
|---------------------------------------------------|-----------------------------------------------------------------------------------|
| <b>Protein Symbol</b>                             | <b>Protein Name</b>                                                               |
| Rbmxl2                                            | RNA binding motif protein, X-linked-like 2                                        |
| Rbmy                                              | RNA binding motif protein, Y chromosome                                           |
| Rbpj                                              | recombination signal binding protein for immunoglobulin kappa J region            |
| Rec8                                              | REC8 homolog (yeast)                                                              |
| repro2                                            | reproductive mutant 2, JAX Reproductive Mutagenesis Program                       |
| repro3                                            | reproductive mutation 3, JAX Reproductive Mutagenesis Program                     |
| Rhob                                              | ras homolog gene family, member B                                                 |
| Rhox5                                             | reproductive homeobox 5                                                           |
| Rhpn1                                             | rhophilin, Rho GTPase binding protein 1                                           |
| Rhpn2                                             | rhophilin, Rho GTPase binding protein 2                                           |
| Rpph1                                             | ribonuclease P RNA component H1                                                   |
| Ryr3                                              | ryanodine receptor 3                                                              |
| Sash3                                             | SAM and SH3 domain containing 3                                                   |
| Senp6                                             | SUMO/sentrin specific peptidase 6                                                 |
| Sepp1                                             | selenoprotein P, plasma, 1                                                        |
| Serpine2                                          | serine (or cysteine) peptidase inhibitor, clade E, member 2                       |
| Siah1a                                            | seven in absentia 1A                                                              |
| Slc16a10                                          | solute carrier family 16 (monocarboxylic acid transporters), member 10            |
| Slc26a8                                           | solute carrier family 26, member 8                                                |
| Slc2a3                                            | solute carrier family 2 (facilitated glucose transporter), member 3               |
| Slc9a1                                            | solute carrier family 9 (sodium/hydrogen exchanger), member 1                     |
| Slc9a5                                            | solute carrier family 9 (sodium/hydrogen exchanger), member 5                     |
| Slc9b2                                            | solute carrier family 9, subfamily B (NHA2, cation proton antiporter 2), member 2 |
| Slx                                               | Sycp3 like X-linked                                                               |
| Slxl1                                             | Slx-like 1                                                                        |
| Sly                                               | Sycp3 like Y-linked                                                               |
| Smc1b                                             | structural maintenance of chromosomes 1B                                          |
| Smok1                                             | sperm motility kinase 1                                                           |
| Smok2a                                            | sperm motility kinase 2A                                                          |
| Smok2b                                            | sperm motility kinase 2B                                                          |
| Smok4a                                            | sperm motility kinase 4A                                                          |
| Snap25                                            | synaptosomal-associated protein 25                                                |
| Spa17                                             | sperm autoantigenic protein 17                                                    |
| Spaca3                                            | sperm acrosome associated 3                                                       |

| Additional proteins compiled in this study |                                                                                |
|--------------------------------------------|--------------------------------------------------------------------------------|
| Protein Symbol                             | Protein Name                                                                   |
| Spaca4                                     | sperm acrosome associated 4                                                    |
| Spag1                                      | sperm associated antigen 1                                                     |
| Spag11a                                    | sperm associated antigen 11A                                                   |
| Spag4                                      | sperm associated antigen 4                                                     |
| Spag5                                      | sperm associated antigen 5                                                     |
| Spag7                                      | sperm associated antigen 7                                                     |
| Spag8                                      | sperm associated antigen 8                                                     |
| Spag9                                      | sperm associated antigen 9                                                     |
| Spam1                                      | sperm adhesion molecule 1                                                      |
| Spata16                                    | spermatogenesis associated 16                                                  |
| Spata17                                    | spermatogenesis associated 17                                                  |
| Spata20                                    | spermatogenesis associated 20                                                  |
| Spata21                                    | spermatogenesis associated 21                                                  |
| Spata24                                    | spermatogenesis associated 24                                                  |
| Spata3                                     | spermatogenesis associated 3                                                   |
| Spata5                                     | spermatogenesis associated 5                                                   |
| Spata9                                     | spermatogenesis associated 9                                                   |
| Spem1                                      | sperm maturation 1                                                             |
| Sphk1                                      | sphingosine kinase 1                                                           |
| Spinkl                                     | serine protease inhibitor, Kazal type-like                                     |
| Spo11                                      | SPO11 meiotic protein covalently bound to DSB homolog ( <i>S. cerevisiae</i> ) |
| Srgn                                       | serglycin                                                                      |
| Srsf2                                      | serine/arginine-rich splicing factor 2                                         |
| Stx1b                                      | syntaxin 1B                                                                    |
| Stx2                                       | syntaxin 2                                                                     |
| Suco                                       | SUN domain containing ossification factor                                      |
| swm2                                       | sperm without mobility 2                                                       |
| Syce1                                      | synaptonemal complex central element protein 1                                 |
| Syce2                                      | synaptonemal complex central element protein 2                                 |
| Sycp2                                      | synaptonemal complex protein 2                                                 |
| Sycp3                                      | synaptonemal complex protein 3                                                 |
| Syt1                                       | synaptotagmin I                                                                |
| Syt6                                       | synaptotagmin VI                                                               |
| Syt8                                       | synaptotagmin VIII                                                             |

| <b>Additional proteins compiled in this study</b> |                                                                               |
|---------------------------------------------------|-------------------------------------------------------------------------------|
| <b>Protein Symbol</b>                             | <b>Protein Name</b>                                                           |
| Syt11                                             | synaptotagmin-like 1                                                          |
| Taf7l                                             | TAF7-like RNA polymerase II, TATA box binding protein (TBP)-associated factor |
| Tcp11                                             | t-complex protein 11                                                          |
| Tcte1                                             | t-complex-associated testis expressed 1                                       |
| Tcte3                                             | t-complex-associated testis expressed 3                                       |
| Tctex1d1                                          | Tctex1 domain containing 1                                                    |
| Tctex1d2                                          | Tctex1 domain containing 2                                                    |
| Tctex1d4                                          | Tctex1 domain containing 4                                                    |
| Tesk1                                             | testis specific protein kinase 1                                              |
| Tex11                                             | testis expressed gene 11                                                      |
| Tex14                                             | testis expressed gene 14                                                      |
| Tg(PRG1)18Wlad                                    | transgene insertion 18, Wyeth Lederle/Anne Deatly                             |
| Tgm4                                              | transglutaminase 4 (prostate)                                                 |
| Tia1                                              | cytotoxic granule-associated RNA binding protein 1                            |
| Tia1l                                             | Tia1 cytotoxic granule-associated RNA binding protein-like 1                  |
| Timp1                                             | tissue inhibitor of metalloproteinase 1                                       |
| Tmprss2                                           | transmembrane protease, serine 2                                              |
| Tnp1                                              | transition protein 1                                                          |
| Tnp2                                              | transition protein 2                                                          |
| Tra2b                                             | transformer 2 beta homolog (Drosophila)                                       |
| Trappc8                                           | trafficking protein particle complex 8                                        |
| Trim36                                            | tripartite motif-containing 36                                                |
| Trip13                                            | thyroid hormone receptor interactor 13                                        |
| Trpc1                                             | transient receptor potential cation channel, subfamily C, member 1            |
| Trpc2                                             | transient receptor potential cation channel, subfamily C, member 2            |
| Trpc4                                             | transient receptor potential cation channel, subfamily C, member 4            |
| Trpc6                                             | transient receptor potential cation channel, subfamily C, member 6            |
| Trrap                                             | transformation/transcription domain-associated protein                        |
| Tsks                                              | testis-specific serine kinase substrate                                       |
| Tspo                                              | translocator protein                                                          |
| Tssk2                                             | testis-specific serine kinase 2                                               |
| Tssk3                                             | testis-specific serine kinase 3                                               |
| Tssk6                                             | testis-specific serine kinase 6                                               |
| Tuba1a                                            | tubulin, alpha 1A                                                             |



| <b>Additional proteins compiled in this study</b> |                                                    |
|---------------------------------------------------|----------------------------------------------------|
| <b>Protein Symbol</b>                             | <b>Protein Name</b>                                |
| Tuba3a                                            | tubulin, alpha 3A                                  |
| Tubd1                                             | tubulin, delta 1                                   |
| Txn2c2                                            | thioredoxin domain containing 2 (spermatozoa)      |
| Tyk2                                              | tyrosine kinase 2                                  |
| Ube2b                                             | ubiquitin-conjugating enzyme E2B                   |
| Usp26                                             | ubiquitin specific peptidase 26                    |
| Vamp5                                             | vesicle-associated membrane protein 5              |
| Ybx2                                              | Y box protein 2                                    |
| Yes1                                              | Yamaguchi sarcoma viral (v-yes) oncogene homolog 1 |
| Zcchc8                                            | zinc finger, CCHC domain containing 8              |
| Zfa-ps                                            | zinc finger protein, autosomal, pseudogene         |
| Zfp474                                            | zinc finger protein 474                            |
| Zfp828                                            | zinc finger protein 828                            |

| Combined list of proteins |                                                         |
|---------------------------|---------------------------------------------------------|
| Protein Symbol            | Protein Name                                            |
| 0710001P09Rik             | coiled-coil-helix-coiled-coil-helix domain containing 6 |
| 1100001H23Rik             | phospholipase B domain containing 1                     |
| 1110017D15Rik             | RIKEN cDNA 1110017D15 gene                              |
| 1110020P15Rik             | RIKEN cDNA 1110020P15 gene                              |
| 1190002A17Rik             | RIKEN cDNA 1190002A17 gene                              |
| 1500001M20Rik             | RIKEN cDNA 1500001M20 gene                              |
| 1600016N20Rik             | RIKEN cDNA 1600016N20 gene                              |
| 1700001L19Rik             | RIKEN cDNA 1700001L19 gene                              |
| 1700001O22Rik             | RIKEN cDNA 1700001O22 gene                              |
| 1700007K13Rik             | RIKEN cDNA 1700007K13 gene                              |
| 1700009P17Rik             | RIKEN cDNA 1700009P17 gene                              |
| 1700011F03Rik             | RIKEN cDNA 1700011F03 gene                              |
| 1700013F07Rik             | RIKEN cDNA 1700013F07 gene                              |
| 1700014D04Rik             | RIKEN cDNA 1700014D04 gene                              |
| 1700018L24Rik             | RIKEN cDNA 1700018L24 gene                              |
| 1700019B03Rik             | RIKEN cDNA 1700019B03 gene                              |
| 1700019D03Rik             | RIKEN cDNA 1700019D03 gene                              |
| 1700019L03Rik             | RIKEN cDNA 1700019L03 gene                              |
| 1700019N19Rik             | RIKEN cDNA 1700019N19 gene                              |
| 1700019O17Rik             | RIKEN cDNA 1700019O17 gene                              |
| 1700020K04Rik             | RIKEN cDNA 1700020K04 gene                              |
| 1700021F05Rik             | RIKEN cDNA 1700021F05 gene                              |
| 1700022A21Rik             | RIKEN cDNA 1700022A21 gene                              |
| 1700023D08Rik             | RIKEN cDNA 1700023D08 gene                              |
| 1700023E05Rik             | RIKEN cDNA 1700023E05 gene                              |
| 1700024P04Rik             | RIKEN cDNA 1700024P04 gene                              |
| 1700026D08Rik             | RIKEN cDNA 1700026D08 gene                              |
| 1700026L06Rik             | RIKEN cDNA 1700026L06 gene                              |
| 1700027A15Rik             | RIKEN cDNA 1700027A15 gene                              |
| 1700027D21Rik             | RIKEN cDNA 1700027D21 gene                              |
| 1700034I23Rik             | RIKEN cDNA 1700034I23 gene                              |
| 1700049K14Rik             | RIKEN cDNA 1700049K14 gene                              |

| Combined list of proteins |                                              |
|---------------------------|----------------------------------------------|
| Protein Symbol            | Protein Name                                 |
| 1700055M20Rik             | testis, prostate and placenta expressed      |
| 1700058C13Rik             | RIKEN cDNA 1700058C13 gene                   |
| 1700061G19Rik             | RIKEN cDNA 1700061G19 gene                   |
| 1700065I17Rik             | RIKEN cDNA 1700065I17 gene                   |
| 1700071K01Rik             | RIKEN cDNA 1700071K01 gene                   |
| 1700080O16Rik             | RIKEN cDNA 1700080O16 gene                   |
| 1700081D17Rik             | phosphatidylethanolamine binding protein 4   |
| 1700101E01Rik             | RIKEN cDNA 1700101E01 gene                   |
| 1700110M21Rik             | RIKEN cDNA 1700110M21 gene                   |
| 1700112C13Rik             | RIKEN cDNA 1700112C13 gene                   |
| 1700113O17Rik             | RIKEN cDNA 1700113O17 gene                   |
| 2810002D13Rik             | leucine rich repeat containing 57            |
| 2810408A11Rik             | RIKEN cDNA 2810408A11 gene                   |
| 4732415M23Rik             | RIKEN cDNA 4732415M23 gene                   |
| 4921507P07Rik             | RIKEN cDNA 4921507P07 gene                   |
| 4921517D21Rik             | RIKEN cDNA 4921517D21 gene                   |
| 4921523A10Rik             | RIKEN cDNA 4921523A10 gene                   |
| 4921524E03Rik             | aldolase 1, A isoform, retrogene 1           |
| 4921530D09Rik             | RIKEN cDNA 4921530D09 gene                   |
| 4930404N11Rik             | RIKEN cDNA 4930404N11 gene                   |
| 4930408G06Rik             | RIKEN cDNA 4930408G06 gene                   |
| 4930415O20Rik             | RIKEN cDNA 4930415O20 gene                   |
| 4930435E12Rik             | RIKEN cDNA 4930435E12 gene                   |
| 4930443G12Rik             | RIKEN cDNA 4930443G12 gene                   |
| 4930511I11Rik             | RIKEN cDNA 4930511I11 gene                   |
| 4930519F16Rik             | RIKEN cDNA 4930519F16 gene                   |
| 4930522H14Rik             | RIKEN cDNA 4930522H14 gene                   |
| 4930523C11Rik             | a disintegrin and metallopeptidase domain 6B |
| 4930550C14Rik             | RIKEN cDNA 4930550C14 gene                   |
| 4930555I21Rik             | RIKEN cDNA 4930555I21 gene                   |
| 4930579C15Rik             | RIKEN cDNA 4930579C15 gene                   |
| 4930579J09Rik             | RIKEN cDNA 4930579J09 gene                   |
| 4931408C20Rik             | RIKEN cDNA 4931408C20 gene                   |
| 4931423N10Rik             | RIKEN cDNA 4931423N10 gene                   |

| Combined list of proteins |                                                            |
|---------------------------|------------------------------------------------------------|
| Protein Symbol            | Protein Name                                               |
| 4931432M23Rik             | RIKEN cDNA 4931432M23 gene                                 |
| 4932425I24Rik             | RIKEN cDNA 4932425I24 gene                                 |
| 4932441B19Rik             | RIKEN cDNA 4932441B19 gene                                 |
| 4933400C05Rik             | RIKEN cDNA 4933400C05 gene                                 |
| 4933405O20Rik             | RIKEN cDNA 4933405O20 gene                                 |
| 4933411K16Rik             | RIKEN cDNA 4933411K16 gene                                 |
| 5730437N04Rik             | RIKEN cDNA 5730437N04 gene                                 |
| 5730469M10Rik             | RIKEN cDNA 5730469M10 gene                                 |
| 9030607L17Rik             | RIKEN cDNA 9030607L17 gene                                 |
| 9130227C08Rik             | RIKEN cDNA 9130227C08Rik gene                              |
| 9230002F21Rik             | defensin beta 22                                           |
| AA467197                  | expressed sequence AA467197                                |
| Abca13                    | ATP-binding cassette, sub-family A (ABC1), member 13       |
| Abcb10                    | ATP-binding cassette, sub-family B (MDR/TAP), member 10    |
| Abcc12                    | ATP-binding cassette, sub-family C (CFTR/MRP), member 12   |
| Abcg2                     | ATP-binding cassette, sub-family G (WHITE), member 2       |
| Abhd11                    | abhydrolase domain containing 11                           |
| Acad9                     | acyl-Coenzyme A dehydrogenase family, member 9             |
| Acadvl                    | acyl-Coenzyme A dehydrogenase, very long chain             |
| Acat1                     | acetyl-Coenzyme A acetyltransferase 1                      |
| Ace                       | angiotensin I converting enzyme (peptidyl-dipeptidase A) 1 |
| Ace3                      | angiotensin I converting enzyme (peptidyl-dipeptidase A) 3 |
| Aco2                      | aconitase 2, mitochondrial                                 |
| Acot10                    | acyl-CoA thioesterase 10                                   |
| Acot7                     | acyl-CoA thioesterase 7                                    |
| Acot9                     | acyl-CoA thioesterase 9                                    |
| Acpp                      | acid phosphatase, prostate                                 |
| Acr                       | acrosin prepropeptide                                      |
| Acrbp                     | proacrosin binding protein                                 |
| Acrbp                     | proacrosin binding protein                                 |
| Acrv1                     | acrosomal vesicle protein 1                                |
| Acsbg2                    | acyl-CoA synthetase bubblegum family member 2              |
| Acs11                     | acyl-CoA synthetase long-chain family member 1             |
| Acta1                     | actin, alpha 1, skeletal muscle                            |

| Combined list of proteins |                                                           |
|---------------------------|-----------------------------------------------------------|
| Protein Symbol            | Protein Name                                              |
| Actb                      | actin, beta                                               |
| Actc1                     | actin, alpha, cardiac muscle 1                            |
| Actg1                     | actin, gamma, cytoplasmic 1                               |
| Actg2                     | actin, gamma 2, smooth muscle, enteric                    |
| Actl7a                    | actin-like 7a                                             |
| Actn4                     | actinin alpha 4                                           |
| Actrt1                    | actin-related protein T1                                  |
| Actrt2                    | actin-related protein T2                                  |
| Acyp1                     | acylphosphatase 1, erythrocyte (common) type              |
| Adad1                     | adenosine deaminase domain containing 1 (testis specific) |
| Adam15                    | a disintegrin and metallopeptidase domain 15 (metargidin) |
| Adam17                    | a disintegrin and metallopeptidase domain 17              |
| Adam18                    | a disintegrin and metallopeptidase domain 18              |
| Adam1a                    | a disintegrin and metallopeptidase domain 1a              |
| Adam1b                    | a disintegrin and metallopeptidase domain 1b              |
| Adam1b                    | a disintegrin and metallopeptidase domain 1b              |
| Adam2                     | a disintegrin and metallopeptidase domain 2               |
| Adam21                    | a disintegrin and metallopeptidase domain 21              |
| Adam23                    | a disintegrin and metallopeptidase domain 23              |
| Adam24                    | a disintegrin and metallopeptidase domain 24 (testase 1)  |
| Adam25                    | a disintegrin and metallopeptidase domain 25 (testase 2)  |
| Adam26a                   | a disintegrin and metallopeptidase domain 26A (testase 3) |
| Adam28                    | a disintegrin and metallopeptidase domain 28              |
| Adam29                    | a disintegrin and metallopeptidase domain 29              |
| Adam3                     | a disintegrin and metallopeptidase domain 3 (cyritestin)  |
| Adam32                    | a disintegrin and metallopeptidase domain 32              |
| Adam4                     | a disintegrin and metallopeptidase domain 4               |
| Adam5                     | a disintegrin and metallopeptidase domain 5               |
| Adam6                     | a disintegrin and metallopeptidase domain 6A              |
| Adam7                     | a disintegrin and metallopeptidase domain 7               |
| Adcy10                    | adenylate cyclase 10                                      |
| Adcy3                     | adenylate cyclase 3                                       |
| Adcy8                     | adenylate cyclase 8                                       |

| Combined list of proteins |                                                                                    |
|---------------------------|------------------------------------------------------------------------------------|
| Protein Symbol            | Protein Name                                                                       |
| Adh1                      | alcohol dehydrogenase 1 (class I)                                                  |
| Agfg1                     | ArfGAP with FG repeats 1                                                           |
| Agfg1                     | ArfGAP with FG repeats 1                                                           |
| Agt                       | angiotensinogen (serpin peptidase inhibitor, clade A, member 8)                    |
| Agtpbp1                   | ATP/GTP binding protein 1                                                          |
| Ahcy                      | S-adenosylhomocysteine hydrolase                                                   |
| Aim1l                     | absent in melanoma 1-like                                                          |
| Ak1                       | adenylate kinase 1                                                                 |
| Ak2                       | adenylate kinase 2                                                                 |
| Ak7                       | adenylate kinase 7                                                                 |
| Akap1                     | A kinase (PRKA) anchor protein 1                                                   |
| Akap10                    | A kinase (PRKA) anchor protein 10                                                  |
| Akap11                    | A kinase (PRKA) anchor protein 11                                                  |
| Akap12                    | A kinase (PRKA) anchor protein (gravin) 12                                         |
| Akap13                    | A kinase (PRKA) anchor protein 13                                                  |
| Akap3                     | A kinase (PRKA) anchor protein 3                                                   |
| Akap4                     | A kinase (PRKA) anchor protein 4                                                   |
| Akap8                     | A kinase (PRKA) anchor protein 8                                                   |
| Akr1a4                    | aldo-keto reductase family 1, member A4 (aldehyde reductase)                       |
| Akr1b10                   | aldo-keto reductase family 1, member B10 (aldose reductase)                        |
| Akr1b3                    | aldo-keto reductase family 1, member B3 (aldose reductase)                         |
| Akr1b7                    | aldo-keto reductase family 1, member B7                                            |
| Akr7a5                    | aldo-keto reductase family 7, member A5 (aflatoxin aldehyde reductase)             |
| Alad                      | aminolevulinate, delta-, dehydratase                                               |
| Alb                       | albumin                                                                            |
| Aldh1a1                   | aldehyde dehydrogenase family 1, subfamily A1                                      |
| Aldh1a2                   | aldehyde dehydrogenase family 1, subfamily A2                                      |
| Aldh9a1                   | aldehyde dehydrogenase 9, subfamily A1                                             |
| Aldoa                     | aldolase A, fructose-bisphosphate                                                  |
| Aldoart2                  | aldolase 1, A isoform, retrogene 2                                                 |
| Aldoc                     | aldolase C, fructose-bisphosphate                                                  |
| Alms1                     | Alstrom syndrome 1 homolog (human)                                                 |
| Als2cr11                  | amyotrophic lateral sclerosis 2 (juvenile) chromosome region, candidate 11 (human) |
| Amdhd2                    | amidohydrolase domain containing 2                                                 |

| Combined list of proteins |                                                                 |
|---------------------------|-----------------------------------------------------------------|
| Protein Symbol            | Protein Name                                                    |
| Anapc5                    | anaphase-promoting complex subunit 5                            |
| Ank1                      | ankyrin 1, erythroid                                            |
| Ankrd11                   | ankyrin repeat domain 11                                        |
| Ankrd5                    | ankyrin repeat domain 5                                         |
| Ankrd57                   | ankyrin repeat domain 57                                        |
| Anxa2                     | annexin A2                                                      |
| Anxa4                     | annexin A4                                                      |
| Anxa5                     | annexin A5                                                      |
| Anxa6                     | annexin A6                                                      |
| Ap3d1                     | adaptor-related protein complex 3, delta 1 subunit              |
| Apbb2                     | amyloid beta (A4) precursor protein-binding, family B, member 2 |
| Apoa1                     | apolipoprotein A-I                                              |
| Apoa1bp                   | apolipoprotein A-I binding protein                              |
| Apoa2                     | apolipoprotein A-II                                             |
| Apoa4                     | apolipoprotein A-IV                                             |
| Apof                      | apolipoprotein F                                                |
| Apoo                      | apolipoprotein O                                                |
| Apool                     | apolipoprotein O-like                                           |
| Aqp7                      | aquaporin 7                                                     |
| Arf2                      | ADP-ribosylation factor 2                                       |
| Arf6                      | ADP-ribosylation factor 6                                       |
| Arhgap17                  | Rho GTPase activating protein 17                                |
| Arhgdia                   | Rho GDP dissociation inhibitor (GDI) alpha                      |
| Arhgef1                   | Rho guanine nucleotide exchange factor (GEF) 1                  |
| Armc3                     | armadillo repeat containing 3                                   |
| Arpm1                     | actin related protein M1                                        |
| Arsa                      | arylsulfatase A                                                 |
| Art3                      | ADP-ribosyltransferase 3                                        |
| Asb9                      | ankyrin repeat and SOCS box-containing 9                        |
| Asrgl1                    | asparaginase like 1                                             |
| Atg16l1                   | autophagy-related 16-like 1 (yeast)                             |
| Atm                       | ataxia telangiectasia mutated homolog (human)                   |
| Atn1                      | atrophin 1                                                      |

| Combined list of proteins |                                                                                               |
|---------------------------|-----------------------------------------------------------------------------------------------|
| Protein Symbol            | Protein Name                                                                                  |
| Atox1                     | ATX1 (antioxidant protein 1) homolog 1 (yeast)                                                |
| Atp13a1                   | ATPase type 13A1                                                                              |
| Atp1a1                    | ATPase, Na <sup>+</sup> /K <sup>+</sup> transporting, alpha 1 polypeptide                     |
| Atp1a2                    | ATPase, Na <sup>+</sup> /K <sup>+</sup> transporting, alpha 2 polypeptide                     |
| Atp1a3                    | ATPase, Na <sup>+</sup> /K <sup>+</sup> transporting, alpha 3 polypeptide                     |
| Atp1a4                    | ATPase, Na <sup>+</sup> /K <sup>+</sup> transporting, alpha 4 polypeptide                     |
| Atp1b3                    | ATPase, Na <sup>+</sup> /K <sup>+</sup> transporting, beta 3 polypeptide                      |
| Atp2b2                    | ATPase, Ca <sup>++</sup> transporting, plasma membrane 2                                      |
| Atp2b4                    | ATPase, Ca <sup>++</sup> transporting, plasma membrane 4                                      |
| Atp2b4                    | ATPase, Ca <sup>++</sup> transporting, plasma membrane 4                                      |
| Atp5a1                    | ATP synthase, H <sup>+</sup> transporting, mitochondrial F1 complex, alpha subunit, isoform 1 |
| Atp5b                     | ATP synthase, H <sup>+</sup> transporting mitochondrial F1 complex, beta subunit              |
| Atp5c1                    | ATP synthase, H <sup>+</sup> transporting, mitochondrial F1 complex, gamma polypeptide 1      |
| Atp5d                     | ATP synthase, H <sup>+</sup> transporting, mitochondrial F1 complex, delta subunit            |
| Atp5f1                    | ATP synthase, H <sup>+</sup> transporting, mitochondrial F0 complex, subunit b, isoform 1     |
| Atp5h                     | ATP synthase, H <sup>+</sup> transporting, mitochondrial F0 complex, subunit d                |
| Atp5k                     | ATP synthase, H <sup>+</sup> transporting, mitochondrial F1F0 complex, subunit e              |
| Atp5l                     | ATP synthase, H <sup>+</sup> transporting, mitochondrial F0 complex, subunit g                |
| Atp5o                     | ATP synthase, H <sup>+</sup> transporting, mitochondrial F1 complex, O subunit                |
| Atp5s                     | ATP synthase, H <sup>+</sup> transporting, mitochondrial F0 complex, subunit s                |
| Atp6v1a                   | ATPase, H <sup>+</sup> transporting, lysosomal V1 subunit A                                   |
| Atp6v1b2                  | ATPase, H <sup>+</sup> transporting, lysosomal V1 subunit B2                                  |
| Atp6v1e1                  | ATPase, H <sup>+</sup> transporting, lysosomal V1 subunit E1                                  |
| Atp6v1h                   | ATPase, H <sup>+</sup> transporting, lysosomal V1 subunit H                                   |
| Atp8b3                    | ATPase, class I, type 8B, member 3                                                            |
| B2m                       | beta-2 microglobulin                                                                          |
| B4galt1                   | UDP-Gal:betaGlcNAc beta 1,4- galactosyltransferase, polypeptide 1                             |
| B4galt4                   | UDP-Gal:betaGlcNAc beta 1,4-galactosyltransferase, polypeptide 4                              |
| Bag6                      | BCL2-associated athanogene 6                                                                  |
| Basp1                     | brain abundant, membrane attached signal protein 1                                            |
| Bat3                      | HLA-B-associated transcript 3                                                                 |
| Bax                       | BCL2-associated X protein                                                                     |
| BB014433                  | expressed sequence BB014433                                                                   |
| Bbs2                      | Bardet-Biedl syndrome 2 (human)                                                               |



| Combined list of proteins |                                                                           |
|---------------------------|---------------------------------------------------------------------------|
| Protein Symbol            | Protein Name                                                              |
| Bbs4                      | Bardet-Biedl syndrome 4 (human)                                           |
| BC005764                  | cDNA sequence BC005764                                                    |
| BC049635                  | cDNA sequence BC049635                                                    |
| BC051142                  | cDNA sequence BC051142                                                    |
| BC089491                  | cDNA sequence BC089491                                                    |
| BC100451                  | cDNA sequence BC100451                                                    |
| Bcs1l                     | BCS1-like (yeast)                                                         |
| Bdh1                      | 3-hydroxybutyrate dehydrogenase, type 1                                   |
| Birc6                     | baculoviral IAP repeat-containing 6                                       |
| Blvra                     | biliverdin reductase A                                                    |
| Boll                      | bol, boule-like (Drosophila)                                              |
| Bpgm                      | 2,3-bisphosphoglycerate mutase                                            |
| Bpnt1                     | bisphosphate 3'-nucleotidase 1                                            |
| Brp44                     | brain protein 44                                                          |
| Brs3                      | bombesin-like receptor 3                                                  |
| Bsg                       | basigin                                                                   |
| Bspry                     | B-box and SPRY domain containing                                          |
| Bzrap1                    | benzodiazapine receptor associated protein 1                              |
| C130090K23Rik             | cell wall biogenesis 43 C-terminal homolog (S. cerevisiae)                |
| C1qbp                     | complement component 1, q subcomponent binding protein                    |
| C3                        | complement component 3                                                    |
| C77370                    | expressed sequence C77370                                                 |
| C920008N22Rik             | RIKEN cDNA C920008N22 gene                                                |
| Cabyr                     | calcium-binding tyrosine-(Y)-phosphorylation regulated (fibrousheathin 2) |
| Cacng3                    | calcium channel, voltage-dependent, gamma subunit 3                       |
| Cadm1                     | cell adhesion molecule 1                                                  |
| Calca                     | calcitonin/calcitonin-related polypeptide, alpha                          |
| Calcb                     | calcitonin-related polypeptide, beta                                      |
| Calm1                     | calmodulin 1                                                              |
| Calm2                     | calmodulin 2                                                              |
| Calm3                     | calmodulin 3                                                              |
| Calr                      | calreticulin                                                              |
| Camk2b                    | calcium/calmodulin-dependent protein kinase II, beta                      |
| Camk2d                    | calcium/calmodulin-dependent protein kinase II, delta                     |

| Combined list of proteins |                                                         |
|---------------------------|---------------------------------------------------------|
| Protein Symbol            | Protein Name                                            |
| Camk4                     | calcium/calmodulin-dependent protein kinase IV          |
| Camp                      | cathelicidin antimicrobial peptide                      |
| Cand1                     | cullin associated and neddylation disassociated 1       |
| Canx                      | calnexin                                                |
| Cap1                      | CAP, adenylate cyclase-associated protein 1 (yeast)     |
| Capza3                    | capping protein (actin filament) muscle Z-line, alpha 3 |
| Capzb                     | capping protein (actin filament) muscle Z-line, beta    |
| Car2                      | carbonic anhydrase 2                                    |
| Car3                      | carbonic anhydrase 3                                    |
| Car4                      | carbonic anhydrase 4                                    |
| Casc1                     | cancer susceptibility candidate 1                       |
| Catsper1                  | cation channel, sperm associated 1                      |
| Catsper2                  | cation channel, sperm associated 2                      |
| Catsper3                  | cation channel, sperm associated 3                      |
| Catsper4                  | cation channel, sperm associated 4                      |
| Catsperb                  | catsper channel auxiliary subunit beta                  |
| Catsperd                  | catsper channel auxiliary subunit delta                 |
| Catsperg2                 | catsper channel auxiliary subunit gamma 2               |
| Cav1                      | caveolin 1, caveolae protein                            |
| Cav2                      | caveolin 2                                              |
| Cav3                      | caveolin 3                                              |
| Cbr1                      | carbonyl reductase 1                                    |
| Cbr4                      | carbonyl reductase 4                                    |
| Ccdc105                   | coiled-coil domain containing 105                       |
| Ccdc11                    | coiled-coil domain containing 11                        |
| Ccdc116                   | coiled-coil domain containing 116                       |
| Ccdc135                   | coiled-coil domain containing 135                       |
| Ccdc136                   | coiled-coil domain containing 136                       |
| Ccdc151                   | coiled-coil domain containing 151                       |
| Ccdc19                    | coiled-coil domain containing 19                        |
| Ccdc21                    | coiled-coil domain containing 21                        |
| Ccdc27                    | coiled-coil domain containing 27                        |
| Ccdc40                    | coiled-coil domain containing 40                        |
| Ccdc54                    | coiled-coil domain containing 54                        |

| Combined list of proteins |                                                                 |
|---------------------------|-----------------------------------------------------------------|
| Protein Symbol            | Protein Name                                                    |
| Ccdc58                    | coiled-coil domain containing 58                                |
| Ccdc63                    | coiled-coil domain containing 63                                |
| Ccdc81                    | coiled-coil domain containing 81                                |
| Ccdc88c                   | coiled-coil domain containing 88C                               |
| Ccin                      | calicin                                                         |
| Ccna1                     | cyclin A1                                                       |
| Ccnd1                     | cyclin D1                                                       |
| Cct2                      | chaperonin containing Tcp1, subunit 2 (beta)                    |
| Cct3                      | chaperonin containing Tcp1, subunit 3 (gamma)                   |
| Cct4                      | chaperonin containing Tcp1, subunit 4 (delta)                   |
| Cct5                      | chaperonin containing Tcp1, subunit 5 (epsilon)                 |
| Cct6a                     | chaperonin containing Tcp1, subunit 6a (zeta)                   |
| Cct7                      | chaperonin containing Tcp1, subunit 7 (eta)                     |
| Cct8                      | chaperonin containing Tcp1, subunit 8 (theta)                   |
| Cd109                     | CD109 antigen                                                   |
| Cd151                     | CD151 antigen                                                   |
| Cd46                      | CD46 antigen, complement regulatory protein                     |
| Cd52                      | CD52 antigen                                                    |
| Cd55                      | CD55 antigen                                                    |
| Cd59a                     | CD59a antigen                                                   |
| Cd59b                     | CD59b antigen                                                   |
| Cdc34                     | cell division cycle 34 homolog ( <i>S. cerevisiae</i> )         |
| Cdk2                      | cyclin-dependent kinase 2                                       |
| Ceacam10                  | carcinoembryonic antigen-related cell adhesion molecule 10      |
| Ceacam2                   | carcinoembryonic antigen-related cell adhesion molecule 2       |
| Cecr5                     | cat eye syndrome chromosome region, candidate 5 homolog (human) |
| Celf3                     | CUGBP, Elav-like family member 3                                |
| Cenpe                     | centromere protein E                                            |
| Cep152                    | centrosomal protein 152                                         |
| Cep350                    | centrosomal protein 350                                         |
| Ces3                      | carboxylesterase 3                                              |
| Ces7                      | carboxylesterase 7                                              |
| Cfh                       | complement component factor h                                   |
| Cfl1                      | cofilin 1, non-muscle                                           |

| Combined list of proteins |                                                         |
|---------------------------|---------------------------------------------------------|
| Protein Symbol            | Protein Name                                            |
| Chchd6                    | coiled-coil-helix-coiled-coil-helix domain containing 6 |
| Chdh                      | choline dehydrogenase                                   |
| Chit1                     | chitinase 1 (chitotriosidase)                           |
| Chrna7                    | cholinergic receptor, nicotinic, alpha polypeptide 7    |
| Cisd1                     | CDGSH iron sulfur domain 1                              |
| Ckb                       | creatine kinase, brain                                  |
| Ckm                       | creatine kinase, muscle                                 |
| Clca1                     | chloride channel calcium activated 1                    |
| Clca2                     | chloride channel calcium activated 2                    |
| Clgn                      | calmegin                                                |
| Clic1                     | chloride intracellular channel 1                        |
| Clmn                      | calmin                                                  |
| Cltc                      | clathrin, heavy polypeptide (Hc)                        |
| Clu                       | clusterin                                               |
| Cmpk1                     | cytidine monophosphate (UMP-CMP) kinase 1               |
| Cnga3                     | cyclic nucleotide gated channel alpha 3                 |
| Cngb1                     | cyclic nucleotide gated channel beta 1                  |
| Cnn1                      | calponin 1                                              |
| Coil                      | coilin                                                  |
| Col8a2                    | collagen, type VIII, alpha 2                            |
| Commd10                   | COMM domain containing 10                               |
| Copb1                     | coatamer protein complex, subunit beta 1                |
| Cotl1                     | coactosin-like 1 (Dictyostelium)                        |
| Cox4i1                    | cytochrome c oxidase subunit IV isoform 1               |
| Cox5a                     | cytochrome c oxidase, subunit Va                        |
| Cox6b2                    | cytochrome c oxidase subunit VIb polypeptide 2          |
| Cox6c                     | cytochrome c oxidase, subunit VIc                       |
| Cox7a2                    | cytochrome c oxidase, subunit VIIa 2                    |
| Cox7a2l                   | cytochrome c oxidase subunit VIIa polypeptide 2-like    |
| Cp                        | ceruloplasmin                                           |
| Cpa5                      | carboxypeptidase A5                                     |
| Cpeb1                     | cytoplasmic polyadenylation element binding protein 1   |
| Cpt1b                     | carnitine palmitoyltransferase 1b, muscle               |
| Cpt2                      | carnitine palmitoyltransferase 2                        |

| Combined list of proteins |                                                        |
|---------------------------|--------------------------------------------------------|
| Protein Symbol            | Protein Name                                           |
| Cpvl                      | carboxypeptidase, vitellogenic-like                    |
| Crat                      | carnitine acetyltransferase                            |
| Creb3                     | cAMP responsive element binding protein 3              |
| Creb3l4                   | cAMP responsive element binding protein 3-like 4       |
| Crisp1                    | cysteine-rich secretory protein 1                      |
| Crisp1                    | cysteine-rich secretory protein 1                      |
| Crisp2                    | cysteine-rich secretory protein 2                      |
| Crisp3                    | cysteine-rich secretory protein 3                      |
| Crisp4                    | cysteine-rich secretory protein 4                      |
| Cryl1                     | crystallin, lambda 1                                   |
| Cryz11                    | crystallin, zeta (quinone reductase)-like 1            |
| Cs                        | citrate synthase                                       |
| Csk                       | c-src tyrosine kinase                                  |
| Csl                       | citrate synthase like                                  |
| Csnk1a1                   | casein kinase 1, alpha 1                               |
| Csnk2a2                   | casein kinase 2, alpha prime polypeptide               |
| Csnk2b                    | casein kinase 2, beta polypeptide                      |
| Csrp1                     | cysteine and glycine-rich protein 1                    |
| Cst13                     | cystatin 13                                            |
| Cst8                      | cystatin 8 (cystatin-related epididymal spermatogenic) |
| Cstf2                     | cleavage stimulation factor, 3' pre-RNA subunit 2      |
| Ctsd                      | cathepsin D                                            |
| Ctsl                      | cathepsin L                                            |
| Ctnn                      | cortactin                                              |
| Cubn                      | cubilin (intrinsic factor-cobalamin receptor)          |
| Cul3                      | cullin 3                                               |
| Cutc                      | cutC copper transporter homolog (E.coli)               |
| Cuzd1                     | CUB and zona pellucida-like domains 1                  |
| Cwf19l1                   | CWF19-like 1, cell cycle control (S. pombe)            |
| Cyb5                      | cytochrome b-5                                         |
| Cyb5b                     | cytochrome b5 type B                                   |
| Cyc1                      | cytochrome c-1                                         |
| Cycs                      | cytochrome c, somatic                                  |
| Cyct                      | cytochrome c, testis                                   |

| Combined list of proteins |                                                                                           |
|---------------------------|-------------------------------------------------------------------------------------------|
| Protein Symbol            | Protein Name                                                                              |
| Cylc1                     | cylicin, basic protein of sperm head cytoskeleton 1                                       |
| Cylc2                     | cylicin, basic protein of sperm head cytoskeleton 2                                       |
| D10Jhu81e                 | DNA segment, Chr 10, Johns Hopkins University 81 expressed                                |
| D11Wsu47e                 | DNA segment, Chr 11, Wayne State University 47, expressed                                 |
| D230040A04Rik             | RIKEN cDNA D230040A04 gene                                                                |
| D3Bwg0562e                | DNA segment, Chr 3, Brigham & Women's Genetics 0562 expressed                             |
| Dak                       | dihydroxyacetone kinase 2 homolog (yeast)                                                 |
| Dazap1                    | DAZ associated protein 1                                                                  |
| Dazl                      | deleted in azoospermia-like                                                               |
| Dbi                       | diazepam binding inhibitor                                                                |
| Dbil5                     | diazepam binding inhibitor-like 5                                                         |
| Ddt                       | D-dopachrome tautomerase                                                                  |
| Ddx25                     | DEAD (Asp-Glu-Ala-Asp) box polypeptide 25                                                 |
| Ddx4                      | DEAD (Asp-Glu-Ala-Asp) box polypeptide 4                                                  |
| Defb19                    | defensin beta 19                                                                          |
| Defb22                    | defensin beta 22                                                                          |
| Dffa                      | DNA fragmentation factor, alpha subunit                                                   |
| Dhrs1                     | dehydrogenase/reductase (SDR family) member 1                                             |
| Dhrs4                     | dehydrogenase/reductase (SDR family) member 4                                             |
| Dhrs7b                    | dehydrogenase/reductase (SDR family) member 7B                                            |
| Dhx29                     | DEAH (Asp-Glu-Ala-His) box polypeptide 29                                                 |
| Disc1                     | disrupted in schizophrenia 1                                                              |
| Dkk1                      | dickkopf-like 1                                                                           |
| Dlat                      | dihydrolipoamide S-acetyltransferase (E2 component of pyruvate dehydrogenase complex)     |
| Dld                       | dihydrolipoamide dehydrogenase                                                            |
| Dlst                      | dihydrolipoamide S-succinyltransferase (E2 component of 2-oxo-glutarate complex)          |
| Dmc1                      | DMC1 dosage suppressor of mck1 homolog, meiosis-specific homologous recombination (yeast) |
| Dmxl2                     | Dmx-like 2                                                                                |
| Dnaaf1                    | dynein, axonemal assembly factor 1                                                        |
| Dnahc1                    | dynein, axonemal, heavy chain 1                                                           |
| Dnahc1                    | dynein, axonemal, heavy chain 1                                                           |
| Dnahc10                   | dynein, axonemal, heavy chain 10                                                          |
| Dnahc12                   | dynein, axonemal, heavy chain 12                                                          |
| Dnahc17                   | dynein, axonemal, heavy chain 17                                                          |

| Combined list of proteins |                                                    |
|---------------------------|----------------------------------------------------|
| Protein Symbol            | Protein Name                                       |
| Dnahc17                   | dynein, axonemal, heavy chain 17                   |
| Dnahc2                    | dynein, axonemal, heavy chain 2                    |
| Dnahc2                    | dynein, axonemal, heavy chain 2                    |
| Dnahc3                    | dynein, axonemal, heavy chain 3                    |
| Dnahc3                    | dynein, axonemal, heavy chain 3                    |
| Dnahc5                    | dynein, axonemal, heavy chain 5                    |
| Dnahc6                    | dynein, axonemal, heavy chain 6                    |
| Dnahc7a                   | dynein, axonemal, heavy chain 7A                   |
| Dnahc7a                   | dynein, axonemal, heavy chain 7A                   |
| Dnahc7b                   | dynein, axonemal, heavy chain 7B                   |
| Dnahc7l                   | dynein, axonemal, heavy chain 12                   |
| Dnahc8                    | dynein, axonemal, heavy chain 8                    |
| Dnahc9                    | dynein, axonemal, heavy chain 9                    |
| Dnaic1                    | dynein, axonemal, intermediate chain 1             |
| Dnaic2                    | dynein, axonemal, intermediate chain 2             |
| Dnaja1                    | DnaJ (Hsp40) homolog, subfamily A, member 1        |
| Dnaja4                    | DnaJ (Hsp40) homolog, subfamily A, member 4        |
| Dnajb11                   | DnaJ (Hsp40) homolog, subfamily B, member 11       |
| Dnajb13                   | DnaJ (Hsp40) related, subfamily B, member 13       |
| Dnajb3                    | DnaJ (Hsp40) homolog, subfamily B, member 3        |
| Dnajb6                    | DnaJ (Hsp40) homolog, subfamily B, member 6        |
| Dnajc11                   | DnaJ (Hsp40) homolog, subfamily C, member 11       |
| Dnali1                    | dynein, axonemal, light intermediate polypeptide 1 |
| Dnmt3l                    | DNA (cytosine-5-)-methyltransferase 3-like         |
| Dnpep                     | aspartyl aminopeptidase                            |
| Dock1                     | dedicator of cytokinesis 1                         |
| Dock11                    | dedicator of cytokinesis 11                        |
| Dpcd                      | deleted in primary ciliary dyskinesia              |
| Dpep3                     | dipeptidase 3                                      |
| Dpp3                      | dipeptidylpeptidase 3                              |
| Drd2                      | dopamine receptor 2                                |
| Dsg1c                     | desmoglein 1 gamma                                 |
| Dstn                      | destrin                                            |
| Dynll1                    | dynein light chain LC8-type 1                      |

| Combined list of proteins |                                                                                        |
|---------------------------|----------------------------------------------------------------------------------------|
| Protein Symbol            | Protein Name                                                                           |
| Dynlt1                    | dynein light chain Tctex-type 1D                                                       |
| Dynlt1b                   | dynein light chain Tctex-type 1B                                                       |
| E130112L23Rik             | RIKEN cDNA E130112L23 gene                                                             |
| E430028B21Rik             | phosphodiesterase 12                                                                   |
| Eef1a1                    | eukaryotic translation elongation factor 1 alpha 1                                     |
| Eef1d                     | eukaryotic translation elongation factor 1 delta (guanine nucleotide exchange protein) |
| Eef1g                     | eukaryotic translation elongation factor 1 gamma                                       |
| Efcab3                    | EF-hand calcium binding domain 3                                                       |
| Efhb                      | EF hand domain family, member B                                                        |
| Efhc1                     | EF-hand domain (C-terminal) containing 1                                               |
| Efhc2                     | EF-hand domain (C-terminal) containing 2                                               |
| EG433182                  | predicted gene 5506                                                                    |
| Egfl7                     | EGF-like domain 7                                                                      |
| Eif2ak4                   | eukaryotic translation initiation factor 2 alpha kinase 4                              |
| Eif4g3                    | eukaryotic translation initiation factor 4 gamma, 3                                    |
| Elmo3                     | engulfment and cell motility 3, ced-12 homolog (C. elegans)                            |
| Enah                      | enabled homolog (Drosophila)                                                           |
| Enkur                     | enkurin, TRPC channel interacting protein                                              |
| Eno1                      | enolase 1, alpha non-neuron                                                            |
| Eno2                      | enolase 2, gamma neuronal                                                              |
| Eno3                      | enolase 3, beta muscle                                                                 |
| Enpp5                     | ectonucleotide pyrophosphatase/phosphodiesterase 5                                     |
| Eprs                      | glutamyl-prolyl-tRNA synthetase                                                        |
| Eqtn                      | equatorin, sperm acrosome associated                                                   |
| Ercc6                     | excision repair cross-complementing rodent repair deficiency, complementation group 6  |
| Ergic1                    | endoplasmic reticulum-golgi intermediate compartment (ERGIC) 1                         |
| Erlin2                    | ER lipid raft associated 2                                                             |
| Es1                       | esterase 1                                                                             |
| Esx1                      | extraembryonic, spermatogenesis, homeobox 1                                            |
| Etfa                      | electron transferring flavoprotein, alpha polypeptide                                  |
| Etfdh                     | electron transferring flavoprotein, dehydrogenase                                      |
| Etv5                      | ets variant gene 5                                                                     |



| Combined list of proteins |                                                                                      |
|---------------------------|--------------------------------------------------------------------------------------|
| Protein Symbol            | Protein Name                                                                         |
| Fabp4                     | fatty acid binding protein 4, adipocyte                                              |
| Fabp9                     | fatty acid binding protein 9, testis                                                 |
| Fahd2a                    | fumarylacetoacetate hydrolase domain containing 2A                                   |
| Fam154a                   | family with sequence similarity 154, member A                                        |
| Fam166a                   | family with sequence similarity 166, member A                                        |
| Fam170b                   | family with sequence similarity 170, member B                                        |
| Fam178a                   | family with sequence similarity 178, member A                                        |
| Fam65c                    | family with sequence similarity 65, member C                                         |
| Fam71a                    | family with sequence similarity 71, member A                                         |
| Fam71b                    | family with sequence similarity 71, member B                                         |
| Fam78a                    | family with sequence similarity 78, member A                                         |
| Fancl                     | Fanconi anemia, complementation group L                                              |
| Fank1                     | fibronectin type 3 and ankyrin repeat domains 1                                      |
| Fbn1                      | fibrillin 1                                                                          |
| Fbp1                      | fructose bisphosphatase 1                                                            |
| Fdx1l                     | ferredoxin 1-like                                                                    |
| Fer                       | fer (fms/fps related) protein kinase                                                 |
| Fgd1                      | FYVE, RhoGEF and PH domain containing 1                                              |
| Fgfr1                     | fibroblast growth factor receptor 1                                                  |
| Fh1                       | fumarate hydratase 1                                                                 |
| fh15                      |                                                                                      |
| Fhl4                      | four and a half LIM domains 4                                                        |
| Fis1                      | fission 1 (mitochondrial outer membrane) homolog (yeast)                             |
| Fkbp10                    | FK506 binding protein 10                                                             |
| Fkbp6                     | FK506 binding protein 6                                                              |
| Fn1                       | fibronectin 1                                                                        |
| Fndc3a                    | fibronectin type III domain containing 3A                                            |
| Fndc8                     | fibronectin type III domain containing 8                                             |
| Foxo3                     | forkhead box O3                                                                      |
| Frm4a                     | FERM domain containing 4A                                                            |
| Fscb                      | fibrous sheath CABYR binding protein                                                 |
| Fscn1                     | fascin homolog 1, actin bundling protein (Strongylocentrotus purpuratus)             |
| Fscn3                     | fascin homolog 3, actin-bundling protein, testicular (Strongylocentrotus purpuratus) |
| Fsip2                     | fibrous sheath-interacting protein 2                                                 |

| Combined list of proteins |                                                                                    |
|---------------------------|------------------------------------------------------------------------------------|
| Protein Symbol            | Protein Name                                                                       |
| Ftmt                      | ferritin mitochondrial                                                             |
| Fxn                       | frataxin                                                                           |
| Fyn                       | Fyn proto-oncogene                                                                 |
| G6pd2                     | glucose-6-phosphate dehydrogenase 2                                                |
| Gadd45a                   | growth arrest and DNA-damage-inducible 45 alpha                                    |
| Galnt3                    | UDP-N-acetyl-alpha-D-galactosamine:polypeptide N-acetylgalactosaminyltransferase 3 |
| Ganab                     | alpha glucosidase 2 alpha neutral subunit                                          |
| Gapdh                     | glyceraldehyde-3-phosphate dehydrogenase                                           |
| Gapdhs                    | glyceraldehyde-3-phosphate dehydrogenase, spermatogenic                            |
| Gas8                      | growth arrest specific 8                                                           |
| Gc                        | group specific component                                                           |
| Gcc2                      | GRIP and coiled-coil domain containing 2                                           |
| Gdi2                      | guanosine diphosphate (GDP) dissociation inhibitor 2                               |
| Gfap                      | glial fibrillary acidic protein                                                    |
| Ggn                       | gametogenetin                                                                      |
| Gk2                       | glycerol kinase 2                                                                  |
| Glb1l                     | galactosidase, beta 1-like                                                         |
| Glcci1                    | glucocorticoid induced transcript 1                                                |
| glg1                      | golgi apparatus protein 1                                                          |
| Glpr111                   | GLI pathogenesis-related 1 like 1                                                  |
| Glpr112                   | GLI pathogenesis-related 1 like 2                                                  |
| Glr1                      | glycine receptor, alpha 1 subunit                                                  |
| Glr2                      | glycine receptor, alpha 2 subunit                                                  |
| Glrb                      | glycine receptor, beta subunit                                                     |
| Glud1                     | glutamate dehydrogenase 1                                                          |
| Glul                      | glutamate-ammonia ligase (glutamine synthetase)                                    |
| Gm128                     | predicted gene 128                                                                 |
| Gm1281                    |                                                                                    |
| Gm13334                   | predicted gene 13334                                                               |
| Gm136                     | predicted gene 136                                                                 |
| Gm166                     | predicted gene 166                                                                 |
| Gm1673                    | predicted gene 1673                                                                |
| Gm3336                    | predicted gene 3336                                                                |
| Gm4535                    | predicted gene 4535                                                                |

| Combined list of proteins |                                                       |
|---------------------------|-------------------------------------------------------|
| Protein Symbol            | Protein Name                                          |
| Gm46                      | predicted gene 46                                     |
| Gm4764                    | predicted gene 4764                                   |
| Gm5803                    | predicted gene 5803                                   |
| Gm595                     | predicted gene 595                                    |
| Gm6316                    | predicted gene 6316                                   |
| Gm6413                    | predicted gene 6413                                   |
| Gm6981                    | predicted gene 6981                                   |
| Gm8394                    | predicted gene 8394                                   |
| Gm884                     | predicted gene 884                                    |
| Gm9047                    | predicted gene 9047                                   |
| Gm9832                    | predicted gene 9832                                   |
| Gnpda1                    | glucosamine-6-phosphate deaminase 1                   |
| Gnpda2                    | glucosamine-6-phosphate deaminase 2                   |
| Gopc                      | golgi associated PDZ and coiled-coil motif containing |
| Gpd1                      | glycerol-3-phosphate dehydrogenase 1 (soluble)        |
| gpd2                      | glycerol phosphate dehydrogenase 2, mitochondrial     |
| Gpi1                      | glucose phosphate isomerase 1                         |
| Gpx3                      | glutathione peroxidase 3                              |
| Gpx4                      | glutathione peroxidase 4                              |
| Gpx5                      | glutathione peroxidase 5                              |
| Gsg1                      | germ cell-specific gene 1                             |
| Gsk3b                     | glycogen synthase kinase 3 beta                       |
| Gsn                       | gelsolin                                              |
| Gstm1                     | glutathione S-transferase, mu 1                       |
| Gstm2                     | glutathione S-transferase, mu 2                       |
| Gstm5                     | glutathione S-transferase, mu 5                       |
| Gsto1                     | glutathione S-transferase omega 1                     |
| Gsto2                     | glutathione S-transferase omega 2                     |
| Gstp1                     | glycerol kinase-like 1                                |
| Gstt2                     | glutathione S-transferase, theta 2                    |
| Gstt3                     | glutathione S-transferase, theta 3                    |
| Gtl3                      | gene trap locus 3                                     |
| Gusb                      | glucuronidase, beta                                   |
| Gyk                       | glycerol kinase                                       |

| Combined list of proteins |                                                                                                                                       |
|---------------------------|---------------------------------------------------------------------------------------------------------------------------------------|
| Protein Symbol            | Protein Name                                                                                                                          |
| Gykl1                     | glycerol kinase-like 1                                                                                                                |
| H1fnt                     | H1 histone family, member N, testis-specific                                                                                          |
| H2afx                     | H2A histone family, member X                                                                                                          |
| H2-Ke6                    | H2-K region expressed gene 6                                                                                                          |
| Hadha                     | hydroxyacyl-Coenzyme A dehydrogenase/3-ketoacyl-Coenzyme A thiolase/enoyl-Coenzyme A hydratase (trifunctional protein), alpha subunit |
| Hadhb                     | hydroxyacyl-Coenzyme A dehydrogenase/3-ketoacyl-Coenzyme A thiolase/enoyl-Coenzyme A hydratase (trifunctional protein), beta subunit  |
| Hba-a1                    | hemoglobin alpha, adult chain 1                                                                                                       |
| Hba-a2                    | hemoglobin, beta adult major chain                                                                                                    |
| Hbb-b1                    | hemoglobin, beta adult major chain                                                                                                    |
| Hbb-b2                    | hexokinase 1                                                                                                                          |
| Hc                        | hemolytic complement                                                                                                                  |
| Hc                        | hemolytic complement                                                                                                                  |
| Hdac1                     | histone deacetylase 1                                                                                                                 |
| Hdhd1a                    | haloacid dehalogenase-like hydrolase domain containing 1A                                                                             |
| Hdhd3                     | haloacid dehalogenase-like hydrolase domain containing 3                                                                              |
| Heatr7a                   | HEAT repeat containing 7A                                                                                                             |
| Heatr7b2                  | XVHEAT repeat family member 7B2                                                                                                       |
| Hibadh                    | 3-hydroxyisobutyrate dehydrogenase                                                                                                    |
| Hibch                     | 3-hydroxyisobutyryl-Coenzyme A hydrolase                                                                                              |
| Hils1                     | histone H1-like protein in spermatids 1                                                                                               |
| Hint1                     | histidine triad nucleotide binding protein 1                                                                                          |
| Hira                      | histone cell cycle regulation defective homolog A ( <i>S. cerevisiae</i> )                                                            |
| Hist1h1t                  | histone cluster 1, H1t                                                                                                                |
| Hist1h2ba                 | histone cluster 1, H2ba                                                                                                               |
| Hist1h4i                  | histone cluster 1, H4i                                                                                                                |
| Hk1                       | hexokinase 1                                                                                                                          |
| Hk2                       | hexokinase 2                                                                                                                          |
| Hkdc1                     | hexokinase domain containing 1                                                                                                        |
| Hmox2                     | heme oxygenase (decycling) 2                                                                                                          |
| Hnrnpa1                   | heterogeneous nuclear ribonucleoprotein A1                                                                                            |
| Hnrnpu                    | heterogeneous nuclear ribonucleoprotein U                                                                                             |
| Hnrpa2b1                  | hypoxanthine guanine phosphoribosyl transferase 1                                                                                     |

| Combined list of proteins |                                                                    |
|---------------------------|--------------------------------------------------------------------|
| Protein Symbol            | Protein Name                                                       |
| Hprt1                     | hemopexin                                                          |
| Hpx                       | heat shock protein 90 alpha (cytosolic), class B member 1          |
| Hsd17b10                  | hydroxysteroid (17-beta) dehydrogenase 10                          |
| Hsp90aa1                  | heat shock protein 90, alpha (cytosolic), class A member 1         |
| Hsp90ab1                  | heat shock protein 90 alpha (cytosolic), class B member 1          |
| Hsp90b1                   | heat shock protein 90, beta (Grp94), member 1                      |
| Hsp90b1                   | heat shock protein 90, beta (Grp94), member 1                      |
| Hspa1b                    | heat shock protein 5                                               |
| Hspa1l                    | heat shock protein 1-like                                          |
| Hspa1l                    | heat shock protein 1-like                                          |
| Hspa2                     | heat shock protein 2                                               |
| Hspa4l                    | heat shock protein 4 like                                          |
| Hspa5                     | heat shock protein 5                                               |
| Hspa8                     | heat shock protein 8                                               |
| Hspa9                     | heat shock protein 9                                               |
| Hspb9                     | heat shock protein, alpha-crystallin-related, B9                   |
| Hspbp1                    | HSPA (heat shock 70kDa) binding protein, cytoplasmic cochaperone 1 |
| Hspd1                     | heat shock protein 1 (chaperonin)                                  |
| Htra2                     | HtrA serine peptidase 2                                            |
| Htt                       | huntingtin                                                         |
| Hyal3                     | hyaluronoglucosaminidase 3                                         |
| Hyal5                     | hyaluronoglucosaminidase 5                                         |
| Hyal6                     | hyaluronoglucosaminidase 6                                         |
| Hydin                     | hydrocephalus inducing                                             |
| Hyou1                     | hypoxia up-regulated 1                                             |
| Idh1                      | isocitrate dehydrogenase 1 (NADP+), soluble                        |
| Idh3a                     | isocitrate dehydrogenase 3 (NAD+) alpha                            |
| Idh3b                     | isocitrate dehydrogenase 3 (NAD+) beta                             |
| Ier3                      | immediate early response 3                                         |
| Ift88                     | intraflagellar transport 88                                        |
| Iggbp1b                   | immunoglobulin (CD79A) binding protein 1b                          |
| Ighg1                     | keratin 1                                                          |
| Igsf8                     | immunoglobulin superfamily, member 8                               |
| Il4i1                     | interleukin 4 induced 1                                            |

| Combined list of proteins |                                                                     |
|---------------------------|---------------------------------------------------------------------|
| Protein Symbol            | Protein Name                                                        |
| Il5                       | interleukin 5                                                       |
| Immt                      | inner membrane protein, mitochondrial                               |
| Impa1                     | inositol (myo)-1(or 4)-monophosphatase 1                            |
| Ing4                      | inhibitor of growth family, member 4                                |
| Inpp5a                    | inositol polyphosphate-5-phosphatase A                              |
| Inpp5b                    | inositol polyphosphate-5-phosphatase B                              |
| Insl6                     | insulin-like 6                                                      |
| Iqcd                      | IQ motif containing D                                               |
| Iqcf5                     | IQ motif containing F5                                              |
| Irgc1                     | immunity-related GTPase family, cinema 1                            |
| Isoc2a                    | isochorismatase domain containing 2a                                |
| Isyna1                    | myo-inositol 1-phosphate synthase A1                                |
| Itga3                     | integrin alpha 3                                                    |
| Itga5                     | integrin alpha 5 (fibronectin receptor alpha)                       |
| Itga6                     | integrin alpha 6                                                    |
| Itgb1                     | integrin beta 1 (fibronectin receptor beta)                         |
| Itgb2                     | integrin beta 2                                                     |
| Itpr1                     | inositol 1,4,5-trisphosphate receptor 1                             |
| Itpr2                     | inositol 1,4,5-triphosphate receptor 2                              |
| Izumo1                    | izumo sperm-egg fusion 1                                            |
| Kcnk4                     | potassium channel, subfamily K, member 4                            |
| Kcnu1                     | potassium channel, subfamily U, member 1                            |
| Kdm3a                     | lysine (K)-specific demethylase 3A                                  |
| Kdm5b                     | lysine (K)-specific demethylase 5B                                  |
| Khdrbs1                   | KH domain containing, RNA binding, signal transduction associated 1 |
| Kif24                     | kinesin family member 24                                            |
| Kif9                      | kinesin family member 9                                             |
| Kit                       | kit oncogene                                                        |
| Klhl10                    | kelch-like 10 (Drosophila)                                          |
| Klk1b27                   | kallikrein 1-related peptidase b27                                  |
| Klkb1                     | kallikrein B, plasma 1                                              |
| Kndc1                     | kinase non-catalytic C-lobe domain (KIND) containing 1              |
| Krt1                      | keratin 1                                                           |
| Krt10                     | keratin 10                                                          |

| Combined list of proteins |                                                                     |
|---------------------------|---------------------------------------------------------------------|
| Protein Symbol            | Protein Name                                                        |
| Krt19                     | keratin 19                                                          |
| Krt2                      | keratin 2                                                           |
| Krt24                     | keratin 24                                                          |
| Krt79                     | keratin 79                                                          |
| Krt8                      | keratin 8                                                           |
| Krt81                     | keratin 81                                                          |
| Krt85                     | keratin 85                                                          |
| Krt9                      | keratin 9                                                           |
| L2hgdh                    | L-2-hydroxyglutarate dehydrogenase                                  |
| Lamb1                     | laminin B1                                                          |
| Lamb1-1                   | laminin B1 subunit 1                                                |
| Lamb2                     | laminin, beta 2                                                     |
| Lap3                      | leucine aminopeptidase 3                                            |
| Lcn5                      | lipocalin 5                                                         |
| Ldha                      | lactate dehydrogenase A-like 6B                                     |
| Ldhal6b                   | lactate dehydrogenase C                                             |
| Ldhb                      | lactate dehydrogenase B                                             |
| Ldhc                      | lactate dehydrogenase C                                             |
| Letm1                     | leucine zipper-EF-hand containing transmembrane protein 1           |
| Lipe                      | lipase, hormone sensitive                                           |
| Lman2                     | lectin, mannose-binding 2                                           |
| Lpp                       | LIM domain containing preferred translocation partner in lipoma     |
| Lrch3                     | leucine-rich repeats and calponin homology (CH) domain containing 3 |
| Lrguk                     | leucine-rich repeats and guanylate kinase domain containing         |
| Lrrc18                    | leucine rich repeat containing 18                                   |
| Lrrc24                    | leucine rich repeat containing 24                                   |
| Lrrc34                    | leucine rich repeat containing 34                                   |
| Lrrc37a                   | leucine rich repeat containing 37A                                  |
| Lrrc57                    | leucine rich repeat containing 57                                   |
| Lrrc7                     | leucine rich repeat containing 7                                    |
| Lta4h                     | leukotriene A4 hydrolase                                            |
| Ltb4dh                    | leukotriene B4 dehydrogenase                                        |
| Ltf                       | lactotransferrin                                                    |

| Combined list of proteins |                                                       |
|---------------------------|-------------------------------------------------------|
| Protein Symbol            | Protein Name                                          |
| Lum                       | lumican                                               |
| Luzp1                     | leucine zipper protein 1                              |
| Ly6g5b                    | lymphocyte antigen 6 complex, locus G5B               |
| Lypd4                     | Ly6/Plaur domain containing 4                         |
| Lypla1                    | lysophospholipase 1                                   |
| Lyz1                      | lysozyme-like 1                                       |
| Lyz6                      | lysozyme-like 6                                       |
| M6pr                      | mannose-6-phosphate receptor, cation dependent        |
| Macf1                     | microtubule-actin crosslinking factor 1               |
| Man2b2                    | mannosidase 2, alpha B2                               |
| Man2c1                    | mannosidase, alpha, class 2C, member 1                |
| Mast2                     | microtubule associated serine/threonine kinase 2      |
| Mcts2                     | malignant T cell amplified sequence 2                 |
| Mdh1                      | mucin 5, subtype B, tracheobronchial                  |
| Mdh2                      | malate dehydrogenase 2, NAD (mitochondrial)           |
| Mdn1                      | midasin homolog (yeast)                               |
| Me1                       | malic enzyme 1, NADP(+)-dependent, cytosolic          |
| Me2                       | malic enzyme 2, NAD(+)-dependent, mitochondrial       |
| Mecr                      | mitochondrial trans-2-enoyl-CoA reductase             |
| Mei1                      | meiosis defective 1                                   |
| Meig1                     | meiosis expressed gene 1                              |
| Mfge8                     | milk fat globule-EGF factor 8 protein                 |
| Mfge8                     | milk fat globule-EGF factor 8 protein                 |
| Mgea5                     | meningioma expressed antigen 5 (hyaluronidase)        |
| Mif4gd                    | MIF4G domain containing                               |
| Mink1                     | misshapen-like kinase 1 (zebrafish)                   |
| Mipol1                    | mirror-image polydactyly gene 1 homolog (human)       |
| Mkks                      | McKusick-Kaufman syndrome                             |
| Mlh1                      | mutL homolog 1 (E. coli)                              |
| Mlh3                      | mutL homolog 3 (E coli)                               |
| Mll2                      | myeloid/lymphoid or mixed-lineage leukemia 2          |
| Mmel1                     | membrane metallo-endopeptidase-like 1                 |
| Mmp1a                     | matrix metallopeptidase 1a (interstitial collagenase) |
| Mns1                      | meiosis-specific nuclear structural protein 1         |



| Combined list of proteins |                                                                   |
|---------------------------|-------------------------------------------------------------------|
| Protein Symbol            | Protein Name                                                      |
| Mpi                       | mannose phosphate isomerase                                       |
| Mrps36                    | mitochondrial ribosomal protein S36                               |
| Ms4a13                    | membrane-spanning 4-domains, subfamily A, member 13               |
| Ms4a14                    | membrane-spanning 4-domains, subfamily A, member 14               |
| Msh4                      | mutS homolog 4 (E. coli)                                          |
| Msh5                      | mutS homolog 5 (E. coli)                                          |
| Msemb                     | beta-microseminoprotein                                           |
| Mtap1a                    | microtubule-associated protein 1 A                                |
| Mtch2                     | mitochondrial carrier homolog 2 (C. elegans)                      |
| Mtx2                      | metaxin 2                                                         |
| Muc5                      | murinoglobulin 1                                                  |
| Muq1                      | myosin, heavy polypeptide 10, non-muscle                          |
| Mybl2                     | myeloblastosis oncogene-like 2                                    |
| Myh10                     | myosin, heavy polypeptide 11, smooth muscle                       |
| Myh11                     | myosin, heavy polypeptide 9, non-muscle                           |
| Myh9                      | myosin, light polypeptide 6, alkali, smooth muscle and non-muscle |
| Myl6                      | myosin, light polypeptide 9, regulatory                           |
| Myl9                      | myosin, light chain 12B, regulatory                               |
| Mylc2b                    | myosin, light polypeptide kinase                                  |
| Mylk                      | myosin IB                                                         |
| Myo1b                     | family with sequence similarity 129, member A                     |
| Nagk                      | N-acetylglucosamine kinase                                        |
| Naglu                     | alpha-N-acetylglucosaminidase (Sanfilippo disease IIIB)           |
| Nanos1                    | nanos homolog 1 (Drosophila)                                      |
| Nanos2                    | nanos homolog 2 (Drosophila)                                      |
| Nanos3                    | nanos homolog 3 (Drosophila)                                      |
| Nckipsd                   | NCK interacting protein with SH3 domain                           |
| Ndufa10                   | NADH dehydrogenase (ubiquinone) 1 alpha subcomplex 10             |
| Ndufa11                   | NADH dehydrogenase (ubiquinone) 1 alpha subcomplex 11             |
| Ndufa12                   | NADH dehydrogenase (ubiquinone) 1 alpha subcomplex, 12            |
| Ndufa13                   | NADH dehydrogenase (ubiquinone) 1 alpha subcomplex, 13            |
| Ndufa2                    | NADH dehydrogenase (ubiquinone) 1 alpha subcomplex, 2             |
| Ndufa5                    | NADH dehydrogenase (ubiquinone) 1 alpha subcomplex, 5             |
| Ndufa6                    | NADH dehydrogenase (ubiquinone) 1 alpha subcomplex, 6 (B14)       |

| Combined list of proteins |                                                                              |
|---------------------------|------------------------------------------------------------------------------|
| Protein Symbol            | Protein Name                                                                 |
| Ndufa7                    | NADH dehydrogenase (ubiquinone) 1 alpha subcomplex, 7 (B14.5a)               |
| Ndufa8                    | NADH dehydrogenase (ubiquinone) 1 alpha subcomplex, 8                        |
| Ndufa9                    | NADH dehydrogenase (ubiquinone) 1 alpha subcomplex, 9                        |
| Ndufab1                   | NADH dehydrogenase (ubiquinone) 1, alpha/beta subcomplex, 1                  |
| Ndufb10                   | NADH dehydrogenase (ubiquinone) 1 beta subcomplex, 10                        |
| Ndufb4                    | NADH dehydrogenase (ubiquinone) 1 beta subcomplex 4                          |
| Ndufb5                    | NADH dehydrogenase (ubiquinone) 1 beta subcomplex, 5                         |
| Ndufb7                    | NADH dehydrogenase (ubiquinone) 1 beta subcomplex, 7                         |
| Ndufc2                    | NADH dehydrogenase (ubiquinone) 1, subcomplex unknown, 2                     |
| Ndufs1                    | NADH dehydrogenase (ubiquinone) Fe-S protein 1                               |
| Ndufs2                    | NADH dehydrogenase (ubiquinone) Fe-S protein 2                               |
| Ndufs3                    | NADH dehydrogenase (ubiquinone) Fe-S protein 3                               |
| Ndufs4                    | NADH dehydrogenase (ubiquinone) Fe-S protein 4                               |
| Ndufs5                    | NADH dehydrogenase (ubiquinone) Fe-S protein 5                               |
| Ndufs6                    | NADH dehydrogenase (ubiquinone) Fe-S protein 6                               |
| Ndufs7                    | NADH dehydrogenase (ubiquinone) Fe-S protein 7                               |
| Ndufv1                    | NADH dehydrogenase (ubiquinone) flavoprotein 1                               |
| Ndufv2                    | NADH dehydrogenase (ubiquinone) flavoprotein 2                               |
| Neu1                      | neuraminidase 1                                                              |
| Neur1a                    | neuralized homolog 1A (Drosophila)                                           |
| Nfs1                      | nitrogen fixation gene 1 (S. cerevisiae)                                     |
| Nhlrc1                    | NHL repeat containing 1                                                      |
| Niban                     | non-metastatic cells 2, protein (NM23B) expressed in                         |
| Nipbl                     | Nipped-B homolog (Drosophila)                                                |
| Nipsnap3a                 | nipsnap homolog 3A (C. elegans)                                              |
| Nkx3-1                    | NK-3 transcription factor, locus 1 (Drosophila)                              |
| Nme2                      | non-metastatic cells 2, protein (NM23B) expressed in                         |
| Nme5                      | non-metastatic cells 5, protein expressed in (nucleoside-diphosphate kinase) |
| Nme7                      | non-metastatic cells 7, protein expressed in (nucleoside-diphosphate kinase) |
| Nme8                      | NME/NM23 family member 8                                                     |
| Npepps                    | aminopeptidase puromycin sensitive                                           |
| Nsf                       | N-ethylmaleimide sensitive fusion protein                                    |
| Nsun4                     | NOL1/NOP2/Sun domain family, member 4                                        |
| Nt5c1b                    | 5'-nucleotidase, cytosolic IB                                                |

| Combined list of proteins |                                                                   |
|---------------------------|-------------------------------------------------------------------|
| Protein Symbol            | Protein Name                                                      |
| Nup153                    | nucleoporin 153                                                   |
| Nup210l                   | nucleoporin 210-like                                              |
| Nup214                    | nucleoporin 214                                                   |
| Nup54                     | nucleoporin 54                                                    |
| Odf1                      | outer dense fiber of sperm tails 1                                |
| Odf2                      | outer dense fiber of sperm tails 2                                |
| Odf3                      | outer dense fiber of sperm tails 3                                |
| Odf4                      | outer dense fiber of sperm tails 4                                |
| Ogdh                      | oxoglutarate dehydrogenase (lipoamide)                            |
| Ogdhl                     | oxoglutarate dehydrogenase-like                                   |
| Olf1r504                  | olfactory receptor 504                                            |
| Olf1r905                  | olfactory receptor 905                                            |
| Oplah                     | 5-oxoprolinase (ATP-hydrolysing)                                  |
| OTTMUSG00000005300        | predicted gene 12070                                              |
| Ovgp1                     | oviductal glycoprotein 1                                          |
| Oxct2a                    | 3-oxoacid CoA transferase 2A                                      |
| Oxct2b                    | 3-oxoacid CoA transferase 2B                                      |
| P4hb                      | prolyl 4-hydroxylase, beta polypeptide                            |
| Pacrg                     | PARK2 co-regulated                                                |
| Pafah1b1                  | platelet-activating factor acetylhydrolase, isoform 1b, subunit 1 |
| Papolb                    | poly (A) polymerase beta (testis specific)                        |
| Parg                      | poly (ADP-ribose) glycohydrolase                                  |
| Park2                     | Parkinson disease (autosomal recessive, juvenile) 2, parkin       |
| Park7                     | Parkinson disease (autosomal recessive, early onset) 7            |
| Parp1                     | poly (ADP-ribose) polymerase family, member 1                     |
| Parp2                     | poly (ADP-ribose) polymerase family, member 2                     |
| Pbp2                      | phosphatidylethanolamine binding protein 2                        |
| Pcdh7                     | protocadherin 7                                                   |
| Pclo                      | piccolo (presynaptic cytomatrix protein)                          |
| Pcmt1                     | protein-L-isoaspartate (D-aspartate) O-methyltransferase 1        |
| Pcp4                      | Purkinje cell protein 4                                           |
| Pcsk4                     | proprotein convertase subtilisin/kexin type 4                     |
| Pcsk6                     | proprotein convertase subtilisin/kexin type 6                     |

| Combined list of proteins |                                                              |
|---------------------------|--------------------------------------------------------------|
| Protein Symbol            | Protein Name                                                 |
| Pcx                       | pyruvate carboxylase                                         |
| Pcyox1                    | prenylcysteine oxidase 1                                     |
| Pde11a                    | phosphodiesterase 11A                                        |
| Pde1a                     | phosphodiesterase 1A, calmodulin-dependent                   |
| Pde1b                     | phosphodiesterase 1B, Ca <sup>2+</sup> -calmodulin dependent |
| Pde4a                     | phosphodiesterase 4A, cAMP specific                          |
| Pdha1                     | pyruvate dehydrogenase E1 alpha 1                            |
| Pdha2                     | pyruvate dehydrogenase E1 alpha 2                            |
| Pdhb                      | pyruvate dehydrogenase (lipoamide) beta                      |
| Pdhx                      | pyruvate dehydrogenase complex, component X                  |
| Pdia3                     | protein disulfide isomerase associated 3                     |
| Pdia4                     | protein disulfide isomerase associated 4                     |
| Pdia6                     | protein disulfide isomerase associated 6                     |
| Pdpk1                     | 3-phosphoinositide dependent protein kinase-1                |
| Pdzk1                     | PDZ domain containing 1                                      |
| Pebp1                     | phosphatidylethanolamine binding protein 1                   |
| Pfkfb4                    | 6-phosphofructo-2-kinase/fructose-2,6-biphosphatase 4        |
| Pfkm                      | phosphofructokinase, muscle                                  |
| Pfkp                      | phosphofructokinase, platelet                                |
| Pfn1                      | profilin 1                                                   |
| Pfn3                      | profilin 3                                                   |
| Pfn4                      | profilin family, member 4                                    |
| Pgam1                     | phosphoglycerate mutase 1                                    |
| Pgam2                     | phosphoglycerate mutase 2                                    |
| Pgcp                      | plasma glutamate carboxypeptidase                            |
| Pgd                       | phosphogluconate dehydrogenase                               |
| Pgk1                      | phosphoglycerate kinase 1                                    |
| Pgk2                      | phosphoglycerate kinase 2                                    |
| Pgrmc1                    | progesterone receptor membrane component 1                   |
| Pgrmc2                    | progesterone receptor membrane component 2                   |
| Pgs1                      | phosphatidylglycerophosphate synthase 1                      |
| Phb                       | prohibitin                                                   |
| Phb2                      | prohibitin 2                                                 |
| Phf1                      | PHD finger protein 1                                         |

| Combined list of proteins |                                                                                                   |
|---------------------------|---------------------------------------------------------------------------------------------------|
| Protein Symbol            | Protein Name                                                                                      |
| Phospho1                  | phosphatase, orphan 1                                                                             |
| Pick1                     | protein interacting with C kinase 1                                                               |
| Pik3ca                    | phosphatidylinositol 3-kinase, catalytic, alpha polypeptide                                       |
| Pik3cb                    | phosphatidylinositol 3-kinase, catalytic, beta polypeptide                                        |
| Pik3cd                    | phosphatidylinositol 3-kinase catalytic delta polypeptide                                         |
| Pik3cg                    | phosphoinositide-3-kinase, catalytic, gamma polypeptide                                           |
| Pik3r1                    | phosphatidylinositol 3-kinase, regulatory subunit, polypeptide 1 (p85 alpha)                      |
| Pik3r3                    | phosphatidylinositol 3 kinase, regulatory subunit, polypeptide 3 (p55)                            |
| Pik3r4                    | phosphatidylinositol 3 kinase, regulatory subunit, polypeptide 4, p150                            |
| Pip                       | prolactin induced protein                                                                         |
| Pitrm1                    | pitrilysin metallepetidase 1                                                                      |
| Piwil1                    | piwi-like RNA-mediated gene silencing 1                                                           |
| Piwil2                    | piwi-like RNA-mediated gene silencing 2                                                           |
| Piwil4                    | piwi-like RNA-mediated gene silencing 4                                                           |
| Pkdrej                    | polycystic kidney disease (polycystin) and REJ (sperm receptor for egg jelly homolog, sea urchin) |
| Pkm2                      | pyruvate kinase, muscle                                                                           |
| Pla2g1b                   | phospholipase A2, group IB, pancreas                                                              |
| Plag1                     | pleiomorphic adenoma gene 1                                                                       |
| Plau                      | plasminogen activator, urokinase                                                                  |
| Plb1                      | phospholipase B1                                                                                  |
| Plbd1                     | phospholipase B domain containing 1                                                               |
| Plcd4                     | phospholipase C, delta 4                                                                          |
| Plekha5                   | pleckstrin homology domain containing, family A member 5                                          |
| Plg                       | plasminogen                                                                                       |
| Pls3                      | plastin 3 (T-isoform)                                                                             |
| Plscr1                    | phospholipid scramblase 1                                                                         |
| Plscr4                    | phospholipid scramblase 4                                                                         |
| Pmfbp1                    | polyamine modulated factor 1 binding protein 1                                                    |
| Pms2                      | postmeiotic segregation increased 2 (S. cerevisiae)                                               |
| Pnpla7                    | patatin-like phospholipase domain containing 7                                                    |
| Ppap2a                    | phosphatidic acid phosphatase type 2A                                                             |
| Ppia                      | peptidylprolyl isomerase A                                                                        |
| Ppm1b                     | protein phosphatase 1B, magnesium dependent, beta isoform                                         |
| Ppp1cc                    | protein phosphatase 1, catalytic subunit, gamma isoform                                           |

| Combined list of proteins |                                                                                                            |
|---------------------------|------------------------------------------------------------------------------------------------------------|
| Protein Symbol            | Protein Name                                                                                               |
| Ppp1r11                   | protein phosphatase 1, regulatory (inhibitor) subunit 11                                                   |
| Ppp1r11                   | protein phosphatase 1, regulatory (inhibitor) subunit 11                                                   |
| Ppp1r7                    | protein phosphatase 1, regulatory (inhibitor) subunit 7                                                    |
| Ppp2r1a                   | protein phosphatase 2 (formerly 2A), regulatory subunit A (PR 65), alpha isoform                           |
| Ppp3cc                    | protein phosphatase 3, catalytic subunit, gamma isoform                                                    |
| Ppp3r2                    | protein phosphatase 3, regulatory subunit B, alpha isoform (calcineurin B, type II)                        |
| Ppp6c                     | protein phosphatase 6, catalytic subunit                                                                   |
| Prcp                      | prolylcarboxypeptidase (angiotensinase C)                                                                  |
| Prdm6                     | PR domain containing 6                                                                                     |
| Prdx1                     | peroxiredoxin 1                                                                                            |
| Prdx2                     | peroxiredoxin 2                                                                                            |
| Prdx5                     | peroxiredoxin 5                                                                                            |
| Prdx6                     | peroxiredoxin 6                                                                                            |
| Prdx6b                    | peroxiredoxin 6B                                                                                           |
| Prdx6-rs1                 | peroxiredoxin 6, related sequence 1                                                                        |
| Prkaca                    | protein kinase, cAMP dependent, catalytic, alpha                                                           |
| Prkar1a                   | protein kinase, cAMP dependent regulatory, type I, alpha                                                   |
| Prkar2a                   | protein kinase, cAMP dependent regulatory, type II alpha                                                   |
| Prkcg                     | protein kinase C, gamma                                                                                    |
| Prkcsh                    | protein kinase C substrate 80K-H                                                                           |
| Prkrir                    | protein-kinase, interferon-inducible double stranded RNA dependent inhibitor, repressor of (P58 repressor) |
| Prm1                      | protamine 1                                                                                                |
| Prm2                      | protamine 2                                                                                                |
| Prom1                     | prominin 1                                                                                                 |
| Pros1                     | protein S (alpha)                                                                                          |
| Prpsap2                   | phosphoribosyl pyrophosphate synthetase-associated protein 2                                               |
| Prrt2                     | proline-rich transmembrane protein 2                                                                       |
| Prss21                    | protease, serine, 21                                                                                       |
| Prss32                    | protease, serine, 32                                                                                       |
| Psat1                     | phosphoserine aminotransferase 1                                                                           |
| Psip1                     | PC4 and SFRS1 interacting protein 1                                                                        |
| Psm1                      | proteasome (prosome, macropain) subunit, alpha type 1                                                      |
| Psm2                      | proteasome (prosome, macropain) subunit, alpha type 2                                                      |
| Psm3                      | proteasome (prosome, macropain) subunit, alpha type 3                                                      |

| Combined list of proteins |                                                                            |
|---------------------------|----------------------------------------------------------------------------|
| Protein Symbol            | Protein Name                                                               |
| Psm5                      | proteasome (prosome, macropain) subunit, alpha type 5                      |
| Psm6                      | proteasome (prosome, macropain) subunit, alpha type 6                      |
| Psm8                      | proteasome (prosome, macropain) subunit, alpha type, 8                     |
| Psb1                      | proteasome (prosome, macropain) subunit, beta type 1                       |
| Psb2                      | proteasome (prosome, macropain) subunit, beta type 2                       |
| Psb3                      | proteasome (prosome, macropain) subunit, beta type 3                       |
| Psb4                      | proteasome (prosome, macropain) subunit, beta type 4                       |
| Psb5                      | proteasome (prosome, macropain) subunit, beta type 5                       |
| Psb6                      | proteasome (prosome, macropain) subunit, beta type 6                       |
| Psb7                      | proteasome (prosome, macropain) subunit, beta type 7                       |
| Psc1                      | protease (prosome, macropain) 26S subunit, ATPase 1                        |
| Psc2                      | proteasome (prosome, macropain) 26S subunit, ATPase 2                      |
| Psc3                      | proteasome (prosome, macropain) 26S subunit, ATPase 3                      |
| Psc3ip                    | proteasome (prosome, macropain) 26S subunit, ATPase 3, interacting protein |
| Psc4                      | proteasome (prosome, macropain) 26S subunit, ATPase, 4                     |
| Psc5                      | protease (prosome, macropain) 26S subunit, ATPase 5                        |
| Psc6                      | proteasome (prosome, macropain) 26S subunit, ATPase, 6                     |
| Psd1                      | proteasome (prosome, macropain) 26S subunit, non-ATPase, 1                 |
| Psd11                     | proteasome (prosome, macropain) 26S subunit, non-ATPase, 11                |
| Psd13                     | proteasome (prosome, macropain) 26S subunit, non-ATPase, 13                |
| Psd14                     | proteasome (prosome, macropain) 26S subunit, non-ATPase, 14                |
| Psd2                      | proteasome (prosome, macropain) 26S subunit, non-ATPase, 2                 |
| Psd3                      | proteasome (prosome, macropain) 26S subunit, non-ATPase, 3                 |
| Psd6                      | proteasome (prosome, macropain) 26S subunit, non-ATPase, 6                 |
| Psd7                      | proteasome (prosome, macropain) 26S subunit, non-ATPase, 7                 |
| Psd8                      | proteasome (prosome, macropain) 26S subunit, non-ATPase, 8                 |
| Pse1                      | proteasome (prosome, macropain) 28 subunit, alpha                          |
| Ptch3                     | patched domain containing 3                                                |
| Ptgs                      | prostaglandin D2 synthase (brain)                                          |
| ptgs1                     | prostaglandin-endoperoxide synthase 1                                      |
| Ptgs2                     | prostaglandin-endoperoxide synthase 2                                      |
| Ptk2b                     | PTK2 protein tyrosine kinase 2 beta                                        |
| Ptpn1                     | protein tyrosine phosphatase, non-receptor type 1                          |
| Pth2                      | peptidyl-tRNA hydrolase 2                                                  |

| Combined list of proteins |                                                                        |
|---------------------------|------------------------------------------------------------------------|
| Protein Symbol            | Protein Name                                                           |
| Pvr12                     | poliovirus receptor-related 2                                          |
| Pvr13                     | poliovirus receptor-related 3                                          |
| Pzp                       | pregnancy zone protein                                                 |
| Qsox1                     | quiescin Q6 sulfhydryl oxidase 1                                       |
| Rab10                     | RAB10, member RAS oncogene family                                      |
| Rab11b                    | RAB11B, member RAS oncogene family                                     |
| Rab14                     | RAB14, member RAS oncogene family                                      |
| Rab22a                    | RAB22A, member RAS oncogene family                                     |
| Rab2a                     | RAB2A, member RAS oncogene family                                      |
| Rab3a                     | RAB3A, member RAS oncogene family                                      |
| Rab3gap2                  | RAB3 GTPase activating protein subunit 2                               |
| Rab5c                     | RAB5C, member RAS oncogene family                                      |
| Rab8a                     | RAB8A, member RAS oncogene family                                      |
| Rab8b                     | RAB8B, member RAS oncogene family                                      |
| Rabggtb                   | RAB geranylgeranyl transferase, b subunit                              |
| Rad17                     | RAD17 homolog (S. pombe)                                               |
| Rae1                      | RAE1 RNA export 1 homolog (S. pombe)                                   |
| Rala                      | v-ral simian leukemia viral oncogene homolog A (ras related)           |
| Rangrf                    | RAN guanine nucleotide release factor                                  |
| Rapgef3                   | Rap guanine nucleotide exchange factor (GEF) 3                         |
| Rapgef4                   | Rap guanine nucleotide exchange factor (GEF) 4                         |
| Rbm12                     | RNA binding motif protein 12                                           |
| Rbmx12                    | RNA binding motif protein, X-linked-like 2                             |
| Rbmy                      | RNA binding motif protein, Y chromosome                                |
| Rbpj                      | recombination signal binding protein for immunoglobulin kappa J region |
| Rcn1                      | reticulocalbin 1                                                       |
| Rec8                      | REC8 homolog (yeast)                                                   |
| Reep6                     | receptor accessory protein 6                                           |
| repro2                    | reproductive mutant 2, JAX Reproductive Mutagenesis Program            |
| repro3                    | reproductive mutation 3, JAX Reproductive Mutagenesis Program          |
| Rfx7                      | regulatory factor X, 7                                                 |
| Rgs22                     | regulator of G-protein signalling 22                                   |
| Rhob                      | ras homolog gene family, member B                                      |
| Rhox5                     | reproductive homeobox 5                                                |



| Combined list of proteins |                                                                                 |
|---------------------------|---------------------------------------------------------------------------------|
| Protein Symbol            | Protein Name                                                                    |
| Rhpn1                     | rhophilin, Rho GTPase binding protein 1                                         |
| Rhpn2                     | rhophilin, Rho GTPase binding protein 2                                         |
| Ribc2                     | RIB43A domain with coiled-coils 2                                               |
| Rif1                      | Rap1 interacting factor 1 homolog (yeast)                                       |
| Rnls                      | renalase, FAD-dependent amine oxidase                                           |
| Ropn1                     | ropporin, rhophilin associated protein 1                                        |
| Ropn1l                    | ropporin 1-like                                                                 |
| Rpn1                      | ribophorin I                                                                    |
| Rpn2                      | ribophorin II                                                                   |
| Rpph1                     | ribonuclease P RNA component H1                                                 |
| Rprml                     | reprimo-like                                                                    |
| Rps27a                    | ribosomal protein S27A                                                          |
| Rrbp1                     | ribosome binding protein 1                                                      |
| Rsh1l                     | radial spokehead-like 1                                                         |
| Rshl2b                    | radial spokehead-like 2B                                                        |
| Rsph1                     | radial spoke head 1 homolog (Chlamydomonas)                                     |
| Rsph9                     | radial spoke head 9 homolog (Chlamydomonas)                                     |
| Rtdr1                     | rhabdoid tumor deletion region gene 1                                           |
| Ryr3                      | ryanodine receptor 3                                                            |
| S100a6                    | S100 calcium binding protein A6 (calcyclin)                                     |
| Sacm1l                    | SAC1 (suppressor of actin mutations 1, homolog)-like (S. cerevisiae)            |
| Samm50                    | sorting and assembly machinery component 50 homolog (S. cerevisiae)             |
| Sash3                     | SAM and SH3 domain containing 3                                                 |
| Satl1                     | spermidine/spermine N1-acetyl transferase-like 1                                |
| Scamp1                    | secretory carrier membrane protein 1                                            |
| Scamp2                    | secretory carrier membrane protein 2                                            |
| Sccpdh                    | saccharopine dehydrogenase (putative)                                           |
| Scnn1b                    | sodium channel, nonvoltage-gated 1 beta                                         |
| Sdccag8                   | serologically defined colon cancer antigen 8                                    |
| Sdha                      | succinate dehydrogenase complex, subunit A, flavoprotein (Fp)                   |
| Sdhb                      | succinate dehydrogenase complex, subunit B, iron sulfur (Ip)                    |
| Sdhd                      | succinate dehydrogenase complex, subunit D, integral membrane protein           |
| Sema6b                    | sema domain, transmembrane domain (TM), and cytoplasmic domain, (semaphorin) 6B |
| Senp6                     | SUMO/sentrin specific peptidase 6                                               |

| Combined list of proteins |                                                                                              |
|---------------------------|----------------------------------------------------------------------------------------------|
| Protein Symbol            | Protein Name                                                                                 |
| Senp8                     | SUMO/sentrin specific peptidase 8                                                            |
| Sepp1                     | selenoprotein P, plasma, 1                                                                   |
| Sept4                     | septin 4                                                                                     |
| Sept7                     | septin 7                                                                                     |
| Serpina1a                 | serine (or cysteine) peptidase inhibitor, clade A, member 1A                                 |
| Serpina1b                 | serine (or cysteine) peptidase inhibitor, clade A, member 1B                                 |
| Serpina1d                 | serine (or cysteine) peptidase inhibitor, clade A, member 1D                                 |
| Serpina1e                 | serine (or cysteine) peptidase inhibitor, clade A, member 1E                                 |
| Serpina1f                 | serine (or cysteine) peptidase inhibitor, clade A, member 1F                                 |
| Serpina3k                 | serine (or cysteine) peptidase inhibitor, clade A, member 3K                                 |
| Serpina5                  | serine (or cysteine) peptidase inhibitor, clade A, member 5                                  |
| Serpib6a                  | serine (or cysteine) peptidase inhibitor, clade B, member 6a                                 |
| Serpine2                  | serine (or cysteine) peptidase inhibitor, clade E, member 2                                  |
| Sgta                      | small glutamine-rich tetratricopeptide repeat (TPR)-containing, alpha                        |
| Sh3bgrl                   | SH3-binding domain glutamic acid-rich protein like                                           |
| Shmt1                     | serine hydroxymethyltransferase 1 (soluble)                                                  |
| Siah1a                    | seven in absentia 1A                                                                         |
| Skiv2l                    | superkiller viralicidic activity 2-like ( <i>S. cerevisiae</i> )                             |
| Slc16a10                  | solute carrier family 16 (monocarboxylic acid transporters), member 10                       |
| Slc16a7                   | solute carrier family 16 (monocarboxylic acid transporters), member 7                        |
| Slc22a21                  | solute carrier family 22 (organic cation transporter), member 21                             |
| Slc22a5                   | solute carrier family 22 (organic cation transporter), member 5                              |
| Slc25a10                  | solute carrier family 25 (mitochondrial carrier, dicarboxylate transporter), member 10       |
| Slc25a3                   | solute carrier family 25 (mitochondrial carrier, phosphate carrier), member 3                |
| Slc25a31                  | solute carrier family 25 (mitochondrial carrier; adenine nucleotide translocator), member 31 |
| Slc25a4                   | solute carrier family 25 (mitochondrial carrier, adenine nucleotide translocator), member 4  |
| Slc26a8                   | solute carrier family 26, member 8                                                           |
| Slc26a8                   | solute carrier family 26, member 8                                                           |
| Slc2a3                    | solute carrier family 2 (facilitated glucose transporter), member 3                          |
| Slc2a3                    | solute carrier family 2 (facilitated glucose transporter), member 3                          |
| Slc2a5                    | solute carrier family 2 (facilitated glucose transporter), member 5                          |
| Slc9a1                    | solute carrier family 9 (sodium/hydrogen exchanger), member 1                                |
| Slc9a5                    | solute carrier family 9 (sodium/hydrogen exchanger), member 5                                |
| Slc9b2                    | solute carrier family 9, subfamily B (NHA2, cation proton antiporter 2), member 2            |

| Combined list of proteins |                                                     |
|---------------------------|-----------------------------------------------------|
| Protein Symbol            | Protein Name                                        |
| Slx                       | Sycp3 like X-linked                                 |
| Slxl1                     | Slx-like 1                                          |
| Sly                       | Sycp3 like Y-linked                                 |
| Smc1b                     | structural maintenance of chromosomes 1B            |
| Smcp                      | sperm mitochondria-associated cysteine-rich protein |
| Smok1                     | sperm motility kinase 1                             |
| Smok2a                    | sperm motility kinase 2A                            |
| Smok2b                    | sperm motility kinase 2B                            |
| Smok4a                    | sperm motility kinase 4A                            |
| Snap25                    | synaptosomal-associated protein 25                  |
| Sod1                      | superoxide dismutase 1, soluble                     |
| Sod2                      | superoxide dismutase 2, mitochondrial               |
| Sord                      | sorbitol dehydrogenase                              |
| Sort1                     | sortilin 1                                          |
| Spa17                     | sperm autoantigenic protein 17                      |
| Spa17                     | sperm autoantigenic protein 17                      |
| Spaca1                    | sperm acrosome associated 1                         |
| Spaca3                    | sperm acrosome associated 3                         |
| Spaca3                    | sperm acrosome associated 3                         |
| Spaca4                    | sperm acrosome associated 4                         |
| Spaca5                    | sperm acrosome associated 5                         |
| Spag1                     | sperm associated antigen 1                          |
| Spag11a                   | sperm associated antigen 11A                        |
| Spag16                    | sperm associated antigen 16                         |
| Spag17                    | sperm associated antigen 17                         |
| Spag4                     | sperm associated antigen 4                          |
| Spag5                     | sperm associated antigen 5                          |
| Spag6                     | sperm associated antigen 6                          |
| Spag7                     | sperm associated antigen 7                          |
| Spag8                     | sperm associated antigen 8                          |
| Spag9                     | sperm associated antigen 9                          |
| Spam1                     | sperm adhesion molecule 1                           |
| Spam1                     | sperm adhesion molecule 1                           |
| Spata16                   | spermatogenesis associated 16                       |

| Combined list of proteins |                                                                       |
|---------------------------|-----------------------------------------------------------------------|
| Protein Symbol            | Protein Name                                                          |
| Spata17                   | spermatogenesis associated 17                                         |
| Spata18                   | spermatogenesis associated 18                                         |
| Spata19                   | spermatogenesis associated 19                                         |
| Spata20                   | spermatogenesis associated 20                                         |
| Spata21                   | spermatogenesis associated 21                                         |
| Spata24                   | spermatogenesis associated 24                                         |
| Spata3                    | spermatogenesis associated 3                                          |
| Spata5                    | spermatogenesis associated 5                                          |
| Spata6                    | spermatogenesis associated 6                                          |
| Spata9                    | spermatogenesis associated 9                                          |
| Spatc1                    | spermatogenesis and centriole associated 1                            |
| Spcs2                     | signal peptidase complex subunit 2 homolog (S. cerevisiae)            |
| Spem1                     | sperm maturation 1                                                    |
| Spesp1                    | sperm equatorial segment protein 1                                    |
| Spg20                     | spastic paraplegia 20, spartin (Troyer syndrome) homolog (human)      |
| Sphk1                     | sphingosine kinase 1                                                  |
| Spink5                    | serine peptidase inhibitor, Kazal type 5                              |
| Spinkl                    | serine protease inhibitor, Kazal type-like                            |
| Spnb2                     | spectrin beta 2                                                       |
| Spo11                     | SPO11 meiotic protein covalently bound to DSB homolog (S. cerevisiae) |
| Sqrdl                     | sulfide quinone reductase-like (yeast)                                |
| Srgn                      | serglycin                                                             |
| Srpk2                     | serine/arginine-rich protein specific kinase 2                        |
| Srpk3                     | serine/arginine-rich protein specific kinase 3                        |
| Srsf2                     | serine/arginine-rich splicing factor 2                                |
| Ssna1                     | Sjogren's syndrome nuclear autoantigen 1                              |
| St13                      | suppression of tumorigenicity 13                                      |
| Stard6                    | StAR-related lipid transfer (START) domain containing 6               |
| Stub1                     | STIP1 homology and U-Box containing protein 1                         |
| Stx1b                     | syntaxin 1B                                                           |
| Stx2                      | syntaxin 2                                                            |
| Stxbp3a                   | syntaxin binding protein 3A                                           |
| Sucla2                    | succinate-Coenzyme A ligase, ADP-forming, beta subunit                |
| Suclg1                    | succinate-CoA ligase, GDP-forming, alpha subunit                      |

| Combined list of proteins |                                                                               |
|---------------------------|-------------------------------------------------------------------------------|
| Protein Symbol            | Protein Name                                                                  |
| Suco                      | SUN domain containing ossification factor                                     |
| Suox                      | sulfite oxidase                                                               |
| swm2                      | sperm without mobility 2                                                      |
| Syce1                     | synaptonemal complex central element protein 1                                |
| Syce2                     | synaptonemal complex central element protein 2                                |
| Sycp2                     | synaptonemal complex protein 2                                                |
| Sycp3                     | synaptonemal complex protein 3                                                |
| Syt1                      | synaptotagmin I                                                               |
| Syt6                      | synaptotagmin VI                                                              |
| Syt8                      | synaptotagmin VIII                                                            |
| Syt11                     | synaptotagmin-like 1                                                          |
| Syt12                     | synaptotagmin-like 2                                                          |
| Taf7l                     | TAF7-like RNA polymerase II, TATA box binding protein (TBP)-associated factor |
| Tagln                     | transgelin                                                                    |
| Tagln2                    | transgelin 2                                                                  |
| Tbc1d17                   | TBC1 domain family, member 17                                                 |
| Tbc1d20                   | TBC1 domain family, member 20                                                 |
| Tbl1x                     | transducin (beta)-like 1 X-linked                                             |
| Tbl2                      | transducin (beta)-like 2                                                      |
| Tcp1                      | t-complex protein 1                                                           |
| Tcp11                     | t-complex protein 11                                                          |
| Tcte1                     | t-complex-associated testis expressed 1                                       |
| Tcte3                     | t-complex-associated testis expressed 3                                       |
| Tctex1d1                  | Tctex1 domain containing 1                                                    |
| Tctex1d2                  | Tctex1 domain containing 2                                                    |
| Tctex1d4                  | Tctex1 domain containing 4                                                    |
| Tekt1                     | tektin 1                                                                      |
| Tekt2                     | tektin 2                                                                      |
| Tekt3                     | tektin 3                                                                      |
| Tekt4                     | tektin 4                                                                      |
| Tekt5                     | tektin 5                                                                      |
| Tepp                      | testis, prostate and placenta expressed                                       |
| Tesk1                     | testis specific protein kinase 1                                              |
| Tex101                    | testis expressed gene 101                                                     |

| Combined list of proteins |                                                                |
|---------------------------|----------------------------------------------------------------|
| Protein Symbol            | Protein Name                                                   |
| Tex11                     | testis expressed gene 11                                       |
| Tex14                     | testis expressed gene 14                                       |
| Tg(PRG1)18Wlad            | transgene insertion 18, Wyeth Lederle/Anne Deatly              |
| Tgm4                      | transglutaminase 4 (prostate)                                  |
| Thap4                     | THAP domain containing 4                                       |
| Theg                      | testicular haploid expressed gene                              |
| Them4                     | thioesterase superfamily member 4                              |
| Thns1                     | threonine synthase-like 1 (bacterial)                          |
| Tia1                      | cytotoxic granule-associated RNA binding protein 1             |
| Tial1                     | Tia1 cytotoxic granule-associated RNA binding protein-like 1   |
| Timm44                    | translocase of inner mitochondrial membrane 44                 |
| Timm50                    | translocase of inner mitochondrial membrane 50 homolog (yeast) |
| Timp1                     | tissue inhibitor of metalloproteinase 1                        |
| Tkt                       | transketolase                                                  |
| Tmed10                    | transmembrane emp24-like trafficking protein 10 (yeast)        |
| Tmem146                   | transmembrane protein 146                                      |
| Tmem147                   | transmembrane protein 147                                      |
| Tmem177                   | transmembrane protein 177                                      |
| Tmem190                   | transmembrane protein 190                                      |
| Tmem30a                   | transmembrane protein 30A                                      |
| Tmprss2                   | transmembrane protease, serine 2                               |
| Tnp1                      | transition protein 1                                           |
| Tnp2                      | transition protein 2                                           |
| Tnr                       | tenascin R                                                     |
| Tomm22                    | translocase of outer mitochondrial membrane 22 homolog (yeast) |
| Tomm40                    | translocase of outer mitochondrial membrane 40 homolog (yeast) |
| Tpi1                      | triosephosphate isomerase 1                                    |
| Tpm1                      | tropomyosin 1, alpha                                           |
| Tpm3                      | tropomyosin 3, gamma                                           |
| Tpp2                      | tripeptidyl peptidase II                                       |
| Tra2b                     | transformer 2 beta homolog (Drosophila)                        |
| Trappc6b                  | trafficking protein particle complex 6B                        |
| Trappc8                   | trafficking protein particle complex 8                         |
| Trf                       | transferrin                                                    |

| Combined list of proteins |                                                                    |
|---------------------------|--------------------------------------------------------------------|
| Protein Symbol            | Protein Name                                                       |
| Trim36                    | tripartite motif-containing 36                                     |
| Trip13                    | thyroid hormone receptor interactor 13                             |
| Trpc1                     | transient receptor potential cation channel, subfamily C, member 1 |
| Trpc2                     | transient receptor potential cation channel, subfamily C, member 2 |
| Trpc3                     | transient receptor potential cation channel, subfamily C, member 3 |
| Trpc4                     | transient receptor potential cation channel, subfamily C, member 4 |
| Trpc6                     | transient receptor potential cation channel, subfamily C, member 6 |
| Trrap                     | transformation/transcription domain-associated protein             |
| try10                     | trypsin 10                                                         |
| Tsga10                    | testis specific 10                                                 |
| Tsk                       | testis-specific serine kinase substrate                            |
| Tsp50                     | testes-specific protease 50                                        |
| Tspo                      | translocator protein                                               |
| Tssk1                     | testis-specific serine kinase 1                                    |
| Tssk2                     | testis-specific serine kinase 2                                    |
| Tssk3                     | testis-specific serine kinase 3                                    |
| Tssk4                     | testis-specific serine kinase 4                                    |
| Tssk6                     | testis-specific serine kinase 6                                    |
| Tssk6                     | testis-specific serine kinase 6                                    |
| Ttc25                     | tetratricopeptide repeat domain 25                                 |
| Ttc39d                    | tetratricopeptide repeat domain 39D                                |
| Ttc8                      | tetratricopeptide repeat domain 8                                  |
| Ttn                       | titin                                                              |
| Ttr                       | transthyretin                                                      |
| Tuba1a                    | tubulin, alpha 1A                                                  |
| Tuba1a                    | tubulin, alpha 1A                                                  |
| Tuba1b                    | tubulin, alpha 1B                                                  |
| Tuba1c                    | tubulin, alpha 1C                                                  |
| Tuba3a                    | tubulin, alpha 3A                                                  |
| Tuba3a                    | tubulin, alpha 3A                                                  |
| Tuba3b                    | tubulin, alpha 3B                                                  |
| Tubb2b                    | tubulin, beta 2B                                                   |
| Tubb2c                    | tubulin, beta 2C                                                   |
| Tubb3                     | tubulin, beta 3                                                    |

| Combined list of proteins |                                                                    |
|---------------------------|--------------------------------------------------------------------|
| Protein Symbol            | Protein Name                                                       |
| Tubb4                     | tubulin, beta 4                                                    |
| Tubd1                     | tubulin, delta 1                                                   |
| Txndc2                    | thioredoxin domain containing 2 (spermatzoa)                       |
| Txndc3                    | thioredoxin domain containing 3 (spermatzoa)                       |
| Tyk2                      | tyrosine kinase 2                                                  |
| Uba52                     | ubiquitin A-52 residue ribosomal protein fusion product 1          |
| Uba6                      | ubiquitin-like modifier activating enzyme 6                        |
| Ubb                       | ubiquitin B                                                        |
| Ube1x                     | ubiquitin-like modifier activating enzyme 1                        |
| Ube2b                     | ubiquitin-conjugating enzyme E2B                                   |
| Ube2v2                    | ubiquitin-conjugating enzyme E2 variant 2                          |
| Ubqln1                    | ubiquilin 1                                                        |
| Ubtd2                     | ubiquitin domain containing 2                                      |
| Ubxn11                    | UBX domain protein 11                                              |
| Ubxn8                     | UBX domain protein 8                                               |
| Uchl1                     | ubiquitin carboxy-terminal hydrolase L1                            |
| Uchl3                     | ubiquitin carboxyl-terminal esterase L3 (ubiquitin thiolesterase)  |
| Uchl4                     | ubiquitin carboxyl-terminal esterase L4                            |
| Uchl5                     | ubiquitin carboxyl-terminal esterase L5                            |
| Ugcgl1                    | UDP-glucose glycoprotein glucosyltransferase 1                     |
| Ugp2                      | UDP-glucose pyrophosphorylase 2                                    |
| Uqcr                      | ubiquinol-cytochrome c reductase (6.4kD) subunit                   |
| Uqcrb                     | ubiquinol-cytochrome c reductase binding protein                   |
| Uqcrc1                    | ubiquinol-cytochrome c reductase core protein 1                    |
| Uqcrc2                    | ubiquinol cytochrome c reductase core protein 2                    |
| Uqcrfs1                   | ubiquinol-cytochrome c reductase, Rieske iron-sulfur polypeptide 1 |
| Uqcrq                     | ubiquinol-cytochrome c reductase, complex III subunit VII          |
| Usp26                     | ubiquitin specific peptidase 26                                    |
| Usp4                      | ubiquitin specific peptidase 4 (proto-oncogene)                    |
| Usp7                      | ubiquitin specific peptidase 7                                     |
| Vamp3                     | vesicle-associated membrane protein 3                              |
| Vamp5                     | vesicle-associated membrane protein 5                              |
| Vapa                      | vesicle-associated membrane protein, associated protein A          |
| Vcl                       | vinculin                                                           |



| Combined list of proteins |                                                                                             |
|---------------------------|---------------------------------------------------------------------------------------------|
| Protein Symbol            | Protein Name                                                                                |
| Vcp                       | valosin containing protein                                                                  |
| Vdac1                     | voltage-dependent anion channel 1                                                           |
| Vdac2                     | voltage-dependent anion channel 2                                                           |
| Vdac3                     | voltage-dependent anion channel 3                                                           |
| Vil2                      | ezrin                                                                                       |
| Vim                       | vimentin                                                                                    |
| Vps13a                    | vacuolar protein sorting 13A (yeast)                                                        |
| Wars                      | tryptophanyl-tRNA synthetase                                                                |
| Was                       | Wiskott-Aldrich syndrome homolog (human)                                                    |
| Wbp7                      | WW domain binding protein 7                                                                 |
| Wdr16                     | WD repeat domain 16                                                                         |
| Wdr49                     | WD repeat domain 49                                                                         |
| Wdr52                     | WD repeat domain 52                                                                         |
| Wdr64                     | WD repeat domain 64                                                                         |
| Wnk2                      | WNK lysine deficient protein kinase 2                                                       |
| Xpnpep1                   | X-prolyl aminopeptidase (aminopeptidase P) 1, soluble                                       |
| Xpo7                      | exportin 7                                                                                  |
| Ybx2                      | Y box protein 2                                                                             |
| Yes1                      | Yamaguchi sarcoma viral (v-yes) oncogene homolog 1                                          |
| Ywhab                     | tyrosine 3-monooxygenase/tryptophan 5-monooxygenase activation protein, beta polypeptide    |
| Ywhae                     | tyrosine 3-monooxygenase/tryptophan 5-monooxygenase activation protein, epsilon polypeptide |
| Ywhaz                     | tyrosine 3-monooxygenase/tryptophan 5-monooxygenase activation protein, zeta polypeptide    |
| Zan                       | zonadhesin                                                                                  |
| Zcchc8                    | zinc finger, CCHC domain containing 8                                                       |
| Zfa-ps                    | zinc finger protein, autosomal, pseudogene                                                  |
| Zfp112                    | zinc finger protein 112                                                                     |
| Zfp395                    | zinc finger protein 395                                                                     |
| Zfp407                    | zinc finger protein 407                                                                     |
| Zfp474                    | zinc finger protein 474                                                                     |
| Zfp828                    | zinc finger protein 828                                                                     |
| Zp3r                      | zona pellucida 3 receptor                                                                   |
| Zpbp                      | zona pellucida binding protein                                                              |
| Zpbp2                     | zona pellucida binding protein 2                                                            |
