# Supplementary material for: Proteins Involved in Motility and Sperm-Egg Interaction Evolve More Rapidly in Mouse Spermatozoa
Source: PubMed Central journal article supplement (PMC3948348; doi:10.1371/journal.pone.0091302), 2014-03-07
Supplement: pone.0091302.s002.pdf [file pone.0091302.s002.pdf]

**Table S2.** List of proteins used in the study.

| Protein | Protein name                                               | Reproductive process | Subcellular location | Molecular function |
|---------|------------------------------------------------------------|----------------------|----------------------|--------------------|
| Acrbp   | Acrosin binding protein                                    | Acrosome reaction    | Head                 | Binding            |
| Afaf    | Acrosome formation- associated factor                      | Acrosome reaction    | Head                 | Binding            |
| Akt1    | RAC-alpha serine/threonine-protein kinase                  | Acrosome reaction    | Head                 | Catalytic          |
| Cacna1h | Voltage-dependent T-type calcium channel subunit alpha-1H  | Acrosome reaction    | Head                 | Transport          |
| Cd46    | CD46 antigen, complement regulatory protein                | Acrosome reaction    | Head                 | Binding            |
| Enkur   | Enkurin                                                    | Acrosome reaction    | Head and flagellum   | Binding            |
| Gla1    | Glycine receptor subunit alpha 1                           | Acrosome reaction    | Head                 | Transport          |
| Itpr1   | Inositol 1,4,5-trisphosphate receptor type 1               | Acrosome reaction    | Head.                | Transport          |
| Pdpk1   | 3-phosphoinositide dependent protein kinase 1              | Acrosome reaction    | Head and flagellum   | Catalytic          |
| Pik3c3  | Phosphoinositide-3-kinase, class 3                         | Acrosome reaction    | Head                 | Catalytic          |
| Pik3r3  | Phosphatidylinositol 3-kinase regulatory subunit 3         | Acrosome reaction    | Head                 | Catalytic          |
| Pla2g1b | Phospholipase A2                                           | Acrosome reaction    | Head                 | Catalytic          |
| Plcd4   | Phospholipase C delta 4                                    | Acrosome reaction    | Head                 | Catalytic          |
| Prkcz   | Protein kinase C zeta type                                 | Acrosome reaction    | Head                 | Catalytic          |
| Ptpn1   | Tyrosine-protein phosphatase non-receptor type 1           | Acrosome reaction    | Head                 | Catalytic          |
| Syt6    | Synaptotagmin-6                                            | Acrosome reaction    | Head                 | Binding            |
| Syt8    | Synaptotagmin-8                                            | Acrosome reaction    | Head                 | Binding            |
| Trim36  | E3 ubiquitin-protein ligase Trim36                         | Acrosome reaction    | Head                 | Catalytic          |
| Trpc2   | Short transient receptor potential channel 2               | Acrosome reaction    | Head                 | Transport          |
| Vcp     | Transitional endoplasmic reticulum ATPase                  | Acrosome reaction    | Head                 | Binding, transport |
| Adcy2   | Adenylate cyclase type 2                                   | Capacitation         | Head                 | Catalytic          |
| Adcy8   | Adenylate cyclase type 8                                   | Capacitation         | Head and flagellum   | Catalytic          |
| Cabyr   | Calcium-binding tyrosine phosphorylation-regulated protein | Capacitation         | Flagellum            | Binding            |
| Cacna1c | Voltage-dependent L-type calcium channel subunit alpha-1C  | Capacitation         | Head and flagellum   | Transport          |
| Calca   | Calcitonin-related polypeptide, alpha                      | Capacitation         | Head and flagellum   | Binding            |
| Calm1   | Calmodulin                                                 | Capacitation         | Head and flagellum   | Binding            |
| Dld     | Dihydrolipoamide dehydrogenase                             | Capacitation         | Head and flagellum   | Catalytic          |
| Fsip2   | Fibrous sheath-interacting protein 2                       | Capacitation         | Flagellum            | Binding            |
| Pcsk4   | Proprotein convertase subtilisin/kexin type 4              | Capacitation         | Head                 | Catalytic          |
| Pde4d   | Phosphodiesterase 4d                                       | Capacitation         | Head and flagellum   | Catalytic          |
| Plscr2  | Phospholipid scramblase 2                                  | Capacitation         | Head                 | Transport          |
| Ppp3r2  | Calcineurin subunit B type 2                               | Capacitation         | Head                 | Catalytic, binding |
| Prkaca  | Sperm -specific protein kinase A catalytic subunit         | Capacitation         | Head                 | Binding            |
| Pyk2    | Protein-tyrosine kinase 2-beta                             | Capacitation         | Head and flagellum   | Catalytic          |
| Rab14   | Ras-related protein Rab-14                                 | Capacitation         | Head                 | Transport          |

| Protein  | Protein name                                                      | Reproductive process | Subcellular location | Molecular function |
|----------|-------------------------------------------------------------------|----------------------|----------------------|--------------------|
| Sacy     | Soluble adenylate cyclase                                         | Capacitation         | Head and flagellum   | Catalytic          |
| Slo3     | Potassium channel subfamily U member 1                            | Capacitation         | Flagellum            | Transport          |
| Tex101   | Testis-expressed protein 101                                      | Capacitation         | Head                 | Catalytic          |
| Trpc3    | Short transient receptor potential channel 3                      | Capacitation         | Flagellum            | Transport          |
| Pebp1    | Phosphatidylethanolamine-binding protein 1                        | Capacitation         | Head and flagellum   | Binding            |
| Svs2     | Semenogelin-1                                                     | Capacitation         | Head                 | Structural         |
| Aldoa1   | Fructosa bisphosphate aldolase                                    | Sperm metabolism     | Flagellum            | Catalytic          |
| Atp5b    | ATP synthetase beta subunit, mitochondrial                        | Sperm metabolism     | Head and flagellum   | Catalytic          |
| Cox6b2   | Cytochrome c oxidase subunit 6B2                                  | Sperm metabolism     | Flagellum            | Catalytic          |
| Csl      | Cytrate synthase-like gene                                        | Sperm metabolism     | Flagellum            | Catalytic          |
| Cyct     | Cytochrome c, testis-specific                                     | Sperm metabolism     | Flagellum            | Binding, transport |
| Dbil5    | Diazepam-binding inhibitor-like 5                                 | Sperm metabolism     | Flagellum            | Binding, transport |
| Dlat     | Dihydrolipoylysine-residue acetyltransferase                      | Sperm metabolism     | Flagellum            | Catalytic          |
| Eno1     | Enolase 1                                                         | Sperm metabolism     | Flagellum            | Catalytic, binding |
| G6pd2    | Glucose-6-phosphate 1-dehydrogenase 2                             | Sperm metabolism     | Flagellum            | Catalytic          |
| Gapdhs   | Glyceraldehyde-3-phosphate dehydrogenase, spermatogenic           | Sperm metabolism     | Flagellum            | Catalytic          |
| Glut3    | Solute carrier family 2, facilitated glucose transporter member 3 | Sperm metabolism     | Head                 | Transport          |
| Gpd2     | Glycerol phosphate deshydrogenase 2                               | Sperm metabolism     | Flagellum            | Binding            |
| Gpi1     | Glucose phosphate isomerase                                       | Sperm metabolism     | Flagellum            | Catalytic          |
| Hk1s     | Hexokinase-1, spermatogenic cell-specific                         | Sperm metabolism     | Head and flagellum   | Catalytic, binding |
| ldh1     | Isocitrate dehydrogenase [NADP] cytoplasmic                       | Sperm metabolism     | Head                 | Catalytic, binding |
| Ldhc     | L-lactate dehydrogenase C chain                                   | Sperm metabolism     | Flagellum            | Catalytic          |
| Mpi      | Mannose-6-phosphate isomerase                                     | Sperm metabolism     | Flagellum            | Catalytic, binding |
| Oxct2a   | Succinyl-CoA:3-ketoacid-coenzyme A transferase 2A, mitochondrial  | Sperm metabolism     | Flagellum            | Unknown            |
| Pdha2    | Piruvate dehydrogenase A2                                         | Sperm metabolism     | Flagellum            | Catalytic          |
| Pfkfb4   | 6-phosphofructo-2-kinase/fructose-2,6-biphosphatase 4             | Sperm metabolism     | Flagellum            | Catalytic, binding |
| Pgam2    | Phosphoglycerate mutase 2                                         | Sperm metabolism     | Flagellum            | catalytic          |
| Pgk2     | Phosphoglycerate kinase 2                                         | Sperm metabolism     | Flagellum            | Catalytic          |
| Pkm2     | Pyruvate kinase isozymes M1/M2                                    | Sperm metabolism     | Flagellum            | Catalytic, binding |
| Ak1      | Adenylate kinase 1                                                | Sperm motility       | Flagellum            | Catalytic          |
| Akap110  | A- kinase anchor protein 3                                        | Sperm motility       | Flagellum            | Binding            |
| Akap82   | A- kinase anchor protein 82                                       | Sperm motility       | Head and flagellum   | Binding            |
| Atp1a4   | Sodium/potassium-transporting ATPase subunit alpha-4              | Sperm motility       | Flagellum            | Transport          |
| Car4     | Carbonic anhydrase-4                                              | Sperm motility       | Head                 | Catalytic          |
| Catsper1 | Cation channel sperm associated protein 1                         | Sperm motility       | Flagellum            | Transport          |
| CatSper2 | Cation channel sperm associated protein 2                         | Sperm motility       | Flagellum            | Transport          |
| Catsper3 | Cation channel sperm associated protein 3                         | Sperm motility       | Flagellum            | Binding            |

| Protein  | Protein name                                                           | Reproductive process | Subcellular location | Molecular function |
|----------|------------------------------------------------------------------------|----------------------|----------------------|--------------------|
| Catsper4 | Cation channel sperm associated protein 4                              | Sperm motility       | Flagellum            | Transport          |
| CatsperG | Cation channel sperm associated protein G                              | Sperm motility       | Flagellum            | Transport          |
| Chdh     | Choline dehydrogenase                                                  | Sperm motility       | Flagellum            | Catalytic          |
| Chrna7   | Neuronal acetylcholine receptor subunit alpha-7                        | Sperm motility       | Flagellum            | Transport          |
| Dnah12   | Dynein heavy chain 12                                                  | Sperm motility       | Flagellum            | Catalytic, binding |
| Gas8     | Growth arrest-specific protein 8                                       | Sperm motility       | Flagellum            | Structural         |
| Ift88    | Intraflagellar transport protein 88 homolog                            | Sperm motility       | Flagellum            | Binding, transport |
| Neurl1a  | Neuralized-like protein 1A                                             | Sperm motility       | Flagellum            | Binding            |
| Nhe1     | Sodium/hydrogen exchanger 1                                            | Sperm motility       | Flagellum            | Transport          |
| Nhe10    | Sodium/hydrogen exchanger 10                                           | Sperm motility       | Flagellum            | Transport          |
| Nhe5     | Sodium/hydrogen exchanger 5                                            | Sperm motility       | Flagellum            | Transport          |
| Odf4     | Outer dense fiber protein-4                                            | Sperm motility       | Flagellum            | Structural         |
| Pmca4    | Plasma membrane calcium/calmodulin-dependent calcium ATPase, isoform 4 | Sperm motility       | Flagellum            | Transport          |
| Rhpn1    | Rhopilin-1                                                             | Sperm motility       | Flagellum            | Binding            |
| Ropn1    | Ropporin-1                                                             | Sperm motility       | Flagellum            | Binding            |
| Slc25a1  | Solute carrier family 25 member 1                                      | Sperm motility       | Flagellum            | Binding            |
| Smcp     | Sperm mitochondria-associated cysteine-rich protein.                   | Sperm motility       | Flagellum            | Structural         |
| Smky     | Sperm motility Kinase Y                                                | Sperm motility       | Flagellum            | Catalytic          |
| Smok2a   | Sperm motility kinase 2A                                               | Sperm motility       | Flagellum            | Catalytic          |
| Smok2b   | Sperm motility kinase 2B                                               | Sperm motility       | Flagellum            | Catalytic          |
| Smok4a   | Sperm motility kinase 4A                                               | Sperm motility       | Flagellum            | Catalytic          |
| Spag6    | Sperm associated antigen 6                                             | Sperm motility       | Flagellum            | Binding            |
| Tctex1   | Dynein light chain Tctex-type 1                                        | Sperm motility       | Flagellum            | Transport          |
| Tctex5   | Dynein light chain Tctex-type 5                                        | Sperm motility       | Head and flagellum   | Catalytic          |
| Tekt3    | Tektin-3                                                               | Sperm motility       | Flagellum            | Binding            |
| Tekt4    | Tektin-4                                                               | Sperm motility       | Flagellum            | Binding            |
| Boll     | Boule-like protein                                                     | Spermatogenesis      | Head                 | Binding            |
| Ccna1    | Cyclin A1                                                              | Spermatogenesis      | Head                 | Binding            |
| Celf3    | CUGBP Elav-like family member 3                                        | Spermatogenesis      | Head                 | Binding            |
| Ctnn     | Cotractine                                                             | Spermatogenesis      | Head                 | Structural         |
| Dazla    | Deleted in azoospermia-like                                            | Spermatogenesis      | Head                 | Binding            |
| Ddx4     | Probable ATP-dependent RNA helicase                                    | Spermatogenesis      | Head                 | Binding            |
| Dnmt3l   | DNA (cytosine-5)-methyltransferase 3-like                              | Spermatogenesis      | Head                 | Catalytic          |
| Etv5     | ETS translocation variant 5                                            | Spermatogenesis      | Head                 | Binding            |
| Fkbp6    | Peptidyl-prolyl cis-trans isomerase FKBP6                              | Spermatogenesis      | Head                 | Catalytic          |
| Fscb     | Fibrous sheath CABYR-binding protein                                   | Spermatogenesis      | Flagellum            | Binding            |
| H1fnt    | Testis-specific H1 histone                                             | Spermatogenesis      | Head                 | Binding            |

| Protein | Protein name                                         | Reproductive process  | Subcellular location | Molecular function   |
|---------|------------------------------------------------------|-----------------------|----------------------|----------------------|
| Hils1   | Histone H1-like protein in spermatids 1              | Spermatogenesis       | Head                 | Binding              |
| Krt9    | Keratin-9                                            | Spermatogenesis       | Flagellum            | Structural           |
| Prm1    | Protamine 1                                          | Spermatogenesis       | Head                 | Binding              |
| Prm2    | Protamine 2                                          | Spermatogenesis       | Head                 | Binding              |
| Pvrl2   | Nectin 2                                             | Spermatogenesis       | Flagellum            | Binding              |
| Rsph1   | Radial spoke head 1 homolog                          | Spermatogenesis       | Head and flagellum   | Binding              |
| Sept4   | Septin-4                                             | Spermatogenesis       | Flagellum            | Structural           |
| Spata16 | Spermatogenesis-associated protein 16                | Spermatogenesis       | Head                 | Binding              |
| Spata24 | Spermatogenesis-associated protein 24                | Spermatogenesis       | Head                 | Binding              |
| Spatc1  | Speriolin                                            | Spermatogenesis       | Flagellum            | Binding              |
| Sptrx1  | Thioredoxin domain-containing protein 2              | Spermatogenesis       | Flagellum            | Catalytic            |
| Stx2    | Sintaxin-2                                           | Spermatogenesis       | Head                 | Binding, transport   |
| Taf7l   | Transcription initiation factor TFIID subunit 7-like | Spermatogenesis       | Flagellum            | Binding              |
| Tekt2   | Tektin-2                                             | Spermatogenesis       | Flagellum            | Structural           |
| Tnp1    | Transition protein-1                                 | Spermatogenesis       | Head                 | Binding              |
| Tnp2    | Transition protein-2                                 | Spermatogenesis       | Head                 | Binding              |
| Tssk1   | Testis-specific serine/threonine-protein kinase-1    | Spermatogenesis       | Head and flagellum   | Catalytic            |
| Tssk2   | Testis-specific serine/threonine-protein kinase-2    | Spermatogenesis       | Flagellum            | Catalytic            |
| Tssk6   | Testis-specific serine/threonine-protein kinase-6    | Spermatogenesis       | Head                 | Catalytic            |
| Vdac3   | Voltage-dependent-anion channel mitochondrial        | Spermatogenesis       | Flagellum            | Transport            |
| Dpep3   | Dipeptidase 3                                        | Spermatogenesis       | Head                 | Catalytic            |
| Pdia3   | Disulfide isomerase A3                               | Spermatogenesis       | Head and flagellum   | Catalytic            |
| Ace     | Angiotensin-converting enzyme                        | Sperm-egg interaction | Head                 | Catalytic            |
| Acrv1   | Acrosomal protein SP-10                              | Sperm-egg interaction | Head                 | Catalytic            |
| Adam18  | A disintegrin and metallopeptidase domain 18         | Sperm-egg interaction | Head                 | Binding              |
| Adam1a  | A disintegrin and metallopeptidase domain 1a         | Sperm-egg interaction | Head                 | Binding              |
| Adam1b  | A disintegrin and metallopeptidase domain 1b         | Sperm-egg interaction | Head                 | Binding              |
| Adam2   | A disintegrin and metallopeptidase domain 2          | Sperm-egg interaction | Head                 | Binding              |
| Adam24  | A disintegrin and metallopeptidase domain 24         | Sperm-egg interaction | Head                 | Catalytic            |
| Adam3   | A disintegrin and metallopeptidase domain 3          | Sperm-egg interaction | Head                 | Binding              |
| Adam32  | A disintegrin and metallopeptidase domain 32         | Sperm-egg interaction | Head                 | Catalytic            |
| Arsa    | Arylsulfatase A                                      | Sperm-egg interaction | Head                 | Catalytic            |
| Atp8b3  | ATPase class I type 8B member 3                      | Sperm-egg interaction | Head                 | Catalytic, transport |
| B4galt1 | Beta-1,4 galactosyltransferase 1                     | Sperm-egg interaction | Head                 | Catalytic            |
| Bsg     | Basigin                                              | Sperm-egg interaction | Head and flagellum   | Binding              |
| Clgn    | Calmegin                                             | Sperm-egg interaction | Head                 | Binding              |

| Protein | Protein name                                                         | Reproductive process  | Subcellular location | Molecular function |
|---------|----------------------------------------------------------------------|-----------------------|----------------------|--------------------|
| Crisp1  | Cysteine-rich secretory protein 1                                    | Sperm-egg interaction | Head and flagellum   | Unknown            |
| Crisp2  | Cysteine-rich secretory protein 2                                    | Sperm-egg interaction | Head and flagellum   | Binding            |
| Crisp4  | Cysteine-rich secretory protein 4                                    | Sperm-egg interaction | Head and flagellum   |                    |
| Ctsl1   | Cysteine-specific cathepsin                                          | Sperm-egg interaction | Head                 | Catalytic          |
| Dkk1    | Dickkopf-like 1                                                      | Sperm-egg interaction | Head                 |                    |
| Hyal5   | Hyaluronidase-5                                                      | Sperm-egg interaction | Head                 | Catalytic          |
| Izumo1  | Izumo sperm-egg fusion protein 1                                     | Sperm-egg interaction | Head                 | Binding            |
| Mgea5   | Beta-N-acetylhexosaminidase                                          | Sperm-egg interaction | Head                 | Catalytic          |
| Ph20    | Hyaluronidase PH-20                                                  | Sperm-egg interaction | Head and flagellum   | Catalytic          |
| Pkdrej  | Polycystic kidney disease and receptor for egg jelly-related protein | Sperm-egg interaction | Head                 | Transport          |
| Sed1    | Bimotif EGF Repeat and Discoidin-Domain Protein-1                    | Sperm-egg interaction | Head                 | Binding            |
| Slxl1   | Putative novel protein similar to Xlr-related, meiosis regulated Xmr | Sperm-egg interaction | Head                 | Transport          |
| Sp56    | Zona pellucida sperm-binding protein 3 receptor                      | Sperm-egg interaction | Head                 | Binding            |
| Spaca3  | Sperm acrosome membrane-associated protein 3                         | Sperm-egg interaction | Head                 | Catalytic          |
| Spesp1  | Sperm equatorial segment protein 1                                   | Sperm-egg interaction | Head                 |                    |
| Tcte1   | T-complex-associated testis-expressed protein 1                      | Sperm-egg interaction | Head                 |                    |
| Tmem190 | Transmembrane protein 190                                            | Sperm-egg interaction | Head                 | Unknown            |
| Zan     | Zonadhesin                                                           | Sperm-egg interaction | Head                 | Binding            |
| Zpbp1   | Zona pellucida binding protein-1                                     | Sperm-egg interaction | Head                 | Binding            |
| Zpbp2   | Zona pellucida binding protein-2                                     | Sperm-egg interaction | Head                 | Binding            |

\* Subcellular location was inferred based on proteomic studies, Gene Ontology annotation (cellular component) databases and a review of literature.

† Molecular function was determined using Gene Ontology annotation (molecular function) databases.
