# Supplementary material for: Proteins Involved in Motility and Sperm-Egg Interaction Evolve More Rapidly in Mouse Spermatozoa
Source: PubMed Central journal article supplement (PMC3948348; doi:10.1371/journal.pone.0091302), 2014-03-07
Supplement: pone.0091302.s003.pdf [file pone.0091302.s003.pdf]

**Table S3.** Values of non-synonymous (dN), synonymous (dS) and dN/dS ( $\omega$ ) ratios estimated for sperm genes. Sperm genes with a dN/dS ratio > 0.5 are shown in bold.

| Gene            | Gene name                                                            | Reproductive process  | dN            | dS            | dN/dS          |
|-----------------|----------------------------------------------------------------------|-----------------------|---------------|---------------|----------------|
| <i>Crisp1</i>   | Cysteine-rich secretory protein 1                                    | Sperm-egg interaction | <b>0.553</b>  | <b>0.4769</b> | <b>1.16493</b> |
| <i>Fscb</i>     | Fibrous sheath CABYR-binding protein                                 | Spermatogenesis       | <b>0.0321</b> | <b>0.0279</b> | <b>1.1505</b>  |
| <i>Slx11</i>    | Putative novel protein similar to Xlr-related, meiosis regulated Xmr | Sperm-egg interaction | <b>0.0649</b> | <b>0.0573</b> | <b>1.1326</b>  |
| <i>Smcp</i>     | Sperm mitochondria-associated cysteine-rich protein.                 | Sperm motility        | <b>0.4891</b> | <b>0.4326</b> | <b>1.13</b>    |
| <i>Hils1</i>    | Histone H1-like protein in spermatids 1                              | Spermatogenesis       | <b>0.2182</b> | <b>0.1978</b> | <b>1.1031</b>  |
| <i>Tmem190</i>  | Transmembrane protein 190                                            | Sperm-egg interaction | <b>0.0866</b> | <b>0.0806</b> | <b>1.0744</b>  |
| <i>Izumo1</i>   | Izumo sperm-egg fusion protein 1                                     | Sperm-egg interaction | <b>0.2261</b> | <b>0.2983</b> | <b>0.75819</b> |
| <i>Sp56</i>     | Zona pellucida sperm-binding protein 3 receptor                      | Sperm-egg interaction | <b>0.1452</b> | <b>0.1931</b> | <b>0.75216</b> |
| <i>Cd46</i>     | CD46 antigen, complement regulatory protein                          | Acrosome reaction     | <b>0.1301</b> | <b>0.1809</b> | <b>0.7193</b>  |
| <i>Adam24</i>   | A disintegrin and metallopeptidase domain 24                         | Sperm-egg interaction | <b>0.15</b>   | <b>0.2106</b> | <b>0.7123</b>  |
| <i>CatSper2</i> | Cation channel sperm associated protein 2                            | Sperm motility        | <b>0.1489</b> | <b>0.2158</b> | <b>0.69023</b> |
| <i>Spesp1</i>   | Sperm equatorial segment protein 1                                   | Sperm-egg interaction | <b>0.1408</b> | <b>0.2062</b> | <b>0.6828</b>  |
| <i>Krt9</i>     | Keratin-9                                                            | Spermatogenesis       | <b>0.131</b>  | <b>0.1971</b> | <b>0.6646</b>  |
| <i>Sptrx1</i>   | Thioredoxin domain-containing protein 2                              | Spermatogenesis       | <b>0.2032</b> | <b>0.3226</b> | <b>0.6299</b>  |
| <i>Ph20</i>     | Hyaluronidase PH-20                                                  | Sperm-egg interaction | <b>0.1374</b> | <b>0.2206</b> | <b>0.62279</b> |
| <i>Acrv1</i>    | Acrosomal protein SP-10                                              | Sperm-egg interaction | <b>0.0939</b> | <b>0.151</b>  | <b>0.6219</b>  |
| <i>Svs2</i>     | Semenogelin-1                                                        | Capacitation          | <b>0.1858</b> | <b>0.3076</b> | <b>0.60407</b> |
| <i>Car4</i>     | Carbonic anhydrase-4                                                 | Sperm motility        | <b>0.176</b>  | <b>0.3023</b> | <b>0.5822</b>  |
| <i>H1fnt</i>    | Testis-specific H1 histone                                           | Spermatogenesis       | <b>0.1358</b> | <b>0.2374</b> | <b>0.5720</b>  |
| <i>G6pd2</i>    | Glucose-6-phosphate 1-dehydrogenase 2                                | Sperm metabolism      | <b>0.0744</b> | <b>0.1386</b> | <b>0.53679</b> |
| <i>Afaf</i>     | Acrosome formation- associated factor                                | Acrosome reaction     | <b>0.1321</b> | <b>0.2504</b> | <b>0.5276</b>  |
| <i>Taf7l</i>    | Transcription initiation factor TFIID subunit 7-like                 | Spermatogenesis       | <b>0.1449</b> | <b>0.2767</b> | <b>0.5237</b>  |
| <i>Smky</i>     | Sperm motility Kinase Y                                              | Sperm motility        | <b>0.1456</b> | <b>0.2823</b> | <b>0.5158</b>  |
| <i>Smok2b</i>   | Sperm motility kinase 2B                                             | Sperm motility        | <b>0.4949</b> | <b>0.9823</b> | <b>0.50384</b> |
| <i>Mpi</i>      | Mannose-6-phosphate isomerase                                        | Sperm metabolism      | <b>0.0667</b> | <b>0.1334</b> | <b>0.5001</b>  |
| <i>Smok4a</i>   | Sperm motility kinase 4A                                             | Sperm motility        | 0.4125        | 0.828         | 0.49819        |
| <i>Smok2a</i>   | Sperm motility kinase 2A                                             | Sperm motility        | 0.4706        | 0.9454        | 0.49772        |
| <i>CatsperG</i> | Cation channel sperm associated protein G                            | Sperm motility        | 0.1402        | 0.2942        | 0.4764         |
| <i>Hyal5</i>    | Hyaluronidase-5                                                      | Sperm-egg interaction | 0.103         | 0.2178        | 0.47264        |
| <i>Adam32</i>   | A disintegrin and metallopeptidase domain 32                         | Sperm-egg interaction | 0.1205        | 0.2585        | 0.4662         |
| <i>Catsper4</i> | Cation channel sperm associated protein 4                            | Sperm motility        | 0.095         | 0.461         | 0.461          |
| <i>Fsip2</i>    | Fibrous sheath-interacting protein 2                                 | Capacitation          | 0.0102        | 0.0223        | 0.4574         |
| <i>Tex101</i>   | Testis-expressed protein 101                                         | Capacitation          | 0.1123        | 0.2511        | 0.4472         |

| Gene            | Gene name                                                            | Reproductive process  | dN     | dS     | dN/dS   |
|-----------------|----------------------------------------------------------------------|-----------------------|--------|--------|---------|
| <i>Cabyr</i>    | Calcium-binding tyrosine phosphorylation-regulated protein           | Capacitation          | 0.064  | 0.147  | 0.4354  |
| <i>Tctex5</i>   | Dynein light chain Tctex-type 5                                      | Sperm motility        | 0.0553 | 0.1281 | 0.4317  |
| <i>Prm1</i>     | Protamine 1                                                          | Spermatogenesis       | 0.0551 | 0.1277 | 0.4315  |
| <i>Odf4</i>     | Outer dense fiber protein-4                                          | Sperm motility        | 0.1147 | 0.2841 | 0.4037  |
| <i>Catsper1</i> | Cation channel sperm associated protein 1                            | Sperm motility        | 0.1751 | 0.4338 | 0.4037  |
| <i>Adam3</i>    | A disintegrin and metallopeptidase domain 3                          | Sperm-egg interaction | 0.1184 | 0.2965 | 0.39911 |
| <i>Zan</i>      | Zonadhesin                                                           | Sperm-egg interaction | 0.0179 | 0.0457 | 0.39209 |
| <i>Adam18</i>   | A disintegrin and metallopeptidase domain 18                         | Sperm-egg interaction | 0.1068 | 0.2747 | 0.3888  |
| <i>Spatc1</i>   | Speriolin                                                            | Spermatogenesis       | 0.012  | 0.0316 | 0.3797  |
| <i>Cox6b2</i>   | Cytochrome c oxidase subunit 6B2                                     | Sperm metabolism      | 0.0404 | 0.1081 | 0.3740  |
| <i>Crisp2</i>   | Cysteine-rich secretory protein 2                                    | Sperm-egg interaction | 0.0886 | 0.2463 | 0.35949 |
| <i>Adam2</i>    | A disintegrin and metallopeptidase domain 2                          | Sperm-egg interaction | 0.089  | 0.2491 | 0.35708 |
| <i>Pkdrej</i>   | Polycystic kidney disease and receptor for egg jelly-related protein | Sperm-egg interaction | 0.1015 | 0.2861 | 0.3548  |
| <i>Adam1a</i>   | A disintegrin and metallopeptidase domain 1a                         | Sperm-egg interaction | 0.1041 | 0.3036 | 0.34298 |
| <i>Slo3</i>     | Potassium channel subfamily U member 1                               | Capacitation          | 0.0061 | 0.0181 | 0.33557 |
| <i>Pik3c3</i>   | Phosphoinositide-3-kinase, class 3                                   | Acrosome reaction     | 0.0117 | 0.0039 | 0.3335  |
| <i>Tctex1</i>   | Dynein light chain Tctex-type 1                                      | Sperm motility        | 0.0557 | 0.1678 | 0.3319  |
| <i>Spaca3</i>   | Sperm acrosome membrane-associated protein 3                         | Sperm-egg interaction | 0.0574 | 0.1762 | 0.32554 |
| <i>Prm2</i>     | Protamine 2                                                          | Spermatogenesis       | 0.0445 | 0.1369 | 0.3251  |
| <i>Syt8</i>     | Synaptotagmin-8                                                      | Acrosome reaction     | 0.0559 | 0.1894 | 0.29489 |
| <i>Pgk2</i>     | Phosphoglycerate kinase 2                                            | Sperm metabolism      | 0.0582 | 0.1985 | 0.2932  |
| <i>Plcd4</i>    | Phospholipase C delta 4                                              | Acrosome reaction     | 0.0622 | 0.2145 | 0.28989 |
| <i>Pla2g1b</i>  | Phospholipase A2                                                     | Acrosome reaction     | 0.0686 | 0.2527 | 0.27136 |
| <i>Aldoa1</i>   | Fructosa bisphosphate aldolase                                       | Sperm metabolism      | 0.0067 | 0.0254 | 0.2638  |
| <i>Ldhc</i>     | L-lactate dehydrogenase C chain                                      | Sperm metabolism      | 0.0559 | 0.2126 | 0.2629  |
| <i>Adam1b</i>   | A disintegrin and metallopeptidase domain 1b                         | Sperm-egg interaction | 0.0113 | 0.0434 | 0.26053 |
| <i>Dpep3</i>    | Dipeptidase 3                                                        | Spermatogenesis       | 0.0536 | 0.2185 | 0.2453  |
| <i>Zpbp1</i>    | Zona pellucida binding protein-1                                     | Sperm-egg interaction | 0.0302 | 0.1231 | 0.24512 |
| <i>Zpbp2</i>    | Zona pellucida binding protein-2                                     | Sperm-egg interaction | 0.079  | 0.323  | 0.24457 |
| <i>Rsph1</i>    | Radial spoke head 1 homolog                                          | Spermatogenesis       | 0.0659 | 0.2728 | 0.2416  |
| <i>Ppp3r2</i>   | Calcineurin subunit B type 2                                         | Capacitation          | 0.0481 | 0.2015 | 0.2387  |
| <i>Tnp2</i>     | Transition protein-2                                                 | Spermatogenesis       | 0.0524 | 0.2198 | 0.2384  |
| <i>Dnmt3l</i>   | DNA (cytosine-5)-methyltransferase 3-like                            | Spermatogenesis       | 0.0687 | 0.2911 | 0.2360  |
| <i>Itpr1</i>    | Inositol 1,4,5-trisphosphate receptor type 1                         | Acrosome reaction     | 0.1323 | 0.5815 | 0.2275  |
| <i>Tcte1</i>    | T-complex-associated testis-expressed protein 1                      | Sperm-egg interaction | 0.0577 | 0.2554 | 0.2259  |

| Gene            | Gene name                                                              | Reproductive process  | dN     | dS     | dN/dS   |
|-----------------|------------------------------------------------------------------------|-----------------------|--------|--------|---------|
| <i>Tekt3</i>    | Tektin-3                                                               | Sperm motility        | 0.0547 | 0.2527 | 0.2165  |
| <i>Pmca4</i>    | Plasma membrane calcium/calmodulin-dependent calcium ATPase, isoform 4 | Sperm motility        | 0.0503 | 0.2333 | 0.21565 |
| <i>Pde4d</i>    | Phosphodiesterase 4d                                                   | Capacitation          | 0.0184 | 0.0037 | 0.2024  |
| <i>Bsg</i>      | Basigin                                                                | Sperm-egg interaction | 0.0605 | 0.3    | 0.2016  |
| <i>Tnp1</i>     | Transition protein-1                                                   | Spermatogenesis       | 0.0185 | 0.0977 | 0.1894  |
| <i>Atp8b3</i>   | ATPase class I type 8B member 3                                        | Sperm-egg interaction | 0.0643 | 0.3411 | 0.1886  |
| <i>Enkur</i>    | Enkurin                                                                | Acrosome reaction     | 0.061  | 0.3328 | 0.18345 |
| <i>Plscr2</i>   | Phospholipid scramblase 2                                              | Capacitation          | 0.0558 | 0.3071 | 0.18178 |
| <i>B4galt1</i>  | Beta-1,4 galactosyltransferase 1                                       | Sperm-egg interaction | 0.0344 | 0.1898 | 0.18125 |
| <i>Oxct2a</i>   | Succinyl-CoA:3-ketoacid-coenzyme A transferase 2A, mitochondrial       | Sperm metabolism      | 0.07   | 0.387  | 0.1809  |
| <i>Vdac3</i>    | Voltage-dependent-anion channel mitochondrial                          | Spermatogenesis       | 0.0221 | 0.1225 | 0.1804  |
| <i>Catsper3</i> | Cation channel sperm associated protein 3                              | Sperm motility        | 0.0779 | 0.4351 | 0.17901 |
| <i>Dkk1</i>     | Dickkopf-like 1                                                        | Sperm-egg interaction | 0.0593 | 0.3393 | 0.1747  |
| <i>Acrbp</i>    | Acrosin binding protein                                                | Acrosome reaction     | 0.0415 | 0.2418 | 0.1717  |
| <i>Akap110</i>  | A- kinase anchor protein 3                                             | Sperm motility        | 0.0402 | 0.2369 | 0.1697  |
| <i>Spata16</i>  | Spermatogenesis-associated protein 16                                  | Spermatogenesis       | 0.0413 | 0.2568 | 0.1608  |
| <i>Clqn</i>     | Calmegin                                                               | Sperm-egg interaction | 0.0464 | 0.2896 | 0.16029 |
| <i>Sed1</i>     | Bimotif EGF Repeat and Discoidin-Domain Protein-1                      | Sperm-egg interaction | 0.0352 | 0.2218 | 0.1587  |
| <i>Trpc2</i>    | Short transient receptor potential channel 2                           | Acrosome reaction     | 0.0393 | 0.2595 | 0.15123 |
| <i>Tssk1</i>    | Testis-specific serine/threonine-protein kinase-1                      | Spermatogenesis       | 0.017  | 0.1126 | 0.1510  |
| <i>Crisp4</i>   | Cysteine-rich secretory protein 4                                      | Sperm-egg interaction | 0.0593 | 0.3992 | 0.1485  |
| <i>Tekt4</i>    | Tektin-4                                                               | Sperm motility        | 0.049  | 0.337  | 0.1454  |
| <i>Dlat</i>     | Dihydrolipoyllysine-residue acetyltransferase                          | Sperm metabolism      | 0.0307 | 0.2145 | 0.1430  |
| <i>Chdh</i>     | Choline dehydrogenase                                                  | Sperm motility        | 0.018  | 0.1272 | 0.1414  |
| <i>Gapdhs</i>   | Glyceraldehyde-3-phosphate dehydrogenase, spermatogenic                | Sperm metabolism      | 0.0464 | 0.3317 | 0.13997 |
| <i>Calca</i>    | Calcitonin-related polypeptide, alpha                                  | Capacitation          | 0.0195 | 0.1042 | 0.13906 |
| <i>Dnah12</i>   | Dynein heavy chain 12                                                  | Sperm motility        | 0.0329 | 0.2419 | 0.1360  |
| <i>Akap82</i>   | A- kinase anchor protein 82                                            | Sperm motility        | 0.0296 | 0.2227 | 0.13267 |
| <i>Tekt2</i>    | Tektin-2                                                               | Spermatogenesis       | 0.0325 | 0.2485 | 0.13083 |
| <i>Ctsl1</i>    | Cysteine-specific cathepsin                                            | Sperm-egg interaction | 0.0329 | 0.2529 | 0.1301  |
| <i>Atp1a4</i>   | Sodium/potassium-transporting ATPase subunit alpha-4                   | Sperm motility        | 0.0349 | 0.2692 | 0.1298  |
| <i>Rhpn1</i>    | Rhophilin-1                                                            | Sperm motility        | 0.0395 | 0.3124 | 0.1264  |
| <i>Ropn1</i>    | Ropporin-1                                                             | Sperm motility        | 0.0233 | 0.186  | 0.1253  |
| <i>Arsa</i>     | Arylsulfatase A                                                        | Sperm-egg interaction | 0.0233 | 0.1903 | 0.1224  |
| <i>Ptpn1</i>    | Tyrosine-protein phosphatase non-receptor type 1                       | Acrosome reaction     | 0.036  | 0.2964 | 0.1215  |

| Gene           | Gene name                                                         | Reproductive process  | dN     | dS     | dN/dS   |
|----------------|-------------------------------------------------------------------|-----------------------|--------|--------|---------|
| <i>Dbil5</i>   | Diazepam-binding inhibitor-like 5                                 | Sperm metabolism      | 0.0286 | 0.2386 | 0.1199  |
| <i>Nhe10</i>   | Sodium/hydrogen exchanger 10                                      | Sperm motility        | 0.0538 | 0.4505 | 0.11934 |
| <i>Pdha2</i>   | Piruvate dehydrogenase A2                                         | Sperm metabolism      | 0.0363 | 0.3062 | 0.11866 |
| <i>Ace</i>     | Angiotensin-converting enzyme                                     | Sperm-egg interaction | 0.0332 | 0.2992 | 0.1110  |
| <i>Ccna1</i>   | Cyclin A1                                                         | Spermatogenesis       | 0.022  | 0.1989 | 0.1106  |
| <i>Pdpk1</i>   | 3-phosphoinositide dependent protein kinase 1                     | Acrosome reaction     | 0.0109 | 0.1025 | 0.10628 |
| <i>Glut3</i>   | Solute carrier family 2, facilitated glucose transporter member 3 | Sperm metabolism      | 0.0292 | 0.2869 | 0.1018  |
| <i>Gpi1</i>    | Glucose phosphate isomerase                                       | Sperm metabolism      | 0.0306 | 0.3058 | 0.1001  |
| <i>Pdia3</i>   | Disulfide isomerase A3                                            | Spermatogenesis       | 0.0157 | 0.1598 | 0.0982  |
| <i>Ak1</i>     | Adenylate kinase 1                                                | Sperm motility        | 0.0304 | 0.3164 | 0.0961  |
| <i>Sacy</i>    | Soluble adenylate cyclase                                         | Capacitation          | 0.0275 | 0.2882 | 0.0954  |
| <i>Ctnn</i>    | Cottractine                                                       | Spermatogenesis       | 0.0149 | 0.1567 | 0.0951  |
| <i>Pvrl2</i>   | Nectin 2                                                          | Spermatogenesis       | 0.0207 | 0.231  | 0.0896  |
| <i>Gpd2</i>    | Glycerol phosphate deshydrogenase 2                               | Sperm metabolism      | 0.0243 | 0.2767 | 0.0878  |
| <i>Boll</i>    | Boule-like protein                                                | Spermatogenesis       | 0.0131 | 0.1523 | 0.0860  |
| <i>Pcsk4</i>   | Proprotein convertase subtilisin/kexin type 4                     | Capacitation          | 0.0195 | 0.2289 | 0.0853  |
| <i>Stx2</i>    | Sintaxin-2                                                        | Spermatogenesis       | 0.0049 | 0.0576 | 0.0850  |
| <i>Pik3r3</i>  | Phosphatidil inositol 3 kinasa regulatory subunit 3               | Acrosome reaction     | 0.0197 | 0.2356 | 0.0837  |
| <i>Dld</i>     | Dihydrolipoamide dehydrogenase                                    | Capacitation          | 0.018  | 0.227  | 0.07944 |
| <i>Etv5</i>    | ETS translocation variant 5                                       | Spermatogenesis       | 0.0155 | 0.2015 | 0.0769  |
| <i>Slc25a1</i> | Solute carrier family 25 member 1                                 | Sperm motility        | 0.0162 | 0.2145 | 0.0755  |
| <i>Idh1</i>    | Isocitrate dehydrogenase [NADP] cytoplasmic                       | Sperm metabolism      | 0.0153 | 0.2124 | 0.0720  |
| <i>Pebp1</i>   | Phosphatidylethanolamine-binding protein 1                        | Capacitation          | 0.0362 | 0.5161 | 0.07005 |
| <i>Trpc3</i>   | Short transient receptor potential channel 3                      | Capacitation          | 0.0237 | 0.3435 | 0.0690  |
| <i>Ddx4</i>    | Probable ATP-dependent RNA helicase                               | Spermatogenesis       | 0.02   | 0.2932 | 0.0682  |
| <i>Pkm2</i>    | Pyruvate kinase isozymes M1/M2                                    | Sperm metabolism      | 0.0329 | 0.4922 | 0.0669  |
| <i>Tssk2</i>   | Testis-specific serine/threonine-protein kinase-2                 | Spermatogenesis       | 0.0084 | 0.1341 | 0.0626  |
| <i>Cacna1h</i> | Voltage-dependent T-type calcium channel subunit alpha-1H         | Acrosome reaction     | 0.0174 | 0.2789 | 0.06226 |
| <i>Fkbp6</i>   | Peptidyl-prolyl cis-trans isomerase FKBP6                         | Spermatogenesis       | 0.0132 | 0.2126 | 0.0621  |
| <i>Pgam2</i>   | Phosphoglycerate mutase 2                                         | Sperm metabolism      | 0.0157 | 0.2592 | 0.0605  |
| <i>Cacna1c</i> | Voltage-dependent L-type calcium channel subunit alpha-1C         | Capacitation          | 0.0133 | 0.2256 | 0.05903 |
| <i>Csl</i>     | Cytrate synthase-like gene                                        | Sperm metabolism      | 0.0043 | 0.0732 | 0.0584  |
| <i>Mgea5</i>   | Beta-N-acetylhexosaminidase                                       | Sperm-egg interaction | 0.0129 | 0.2292 | 0.0565  |
| <i>Hk1s</i>    | Hexokinase-1, spermatogenic cell-specific                         | Sperm metabolism      | 0.0161 | 0.2939 | 0.0549  |
| <i>Eno1</i>    | Enolase 1                                                         | Sperm metabolism      | 0.0155 | 0.2849 | 0.0544  |

| Gene           | Gene name                                             | Reproductive process | dN     | dS     | dN/dS   |
|----------------|-------------------------------------------------------|----------------------|--------|--------|---------|
| <i>Spata24</i> | Spermatogenesis-associated protein 24                 | Spermatogenesis      | 0.0143 | 0.2714 | 0.0527  |
| <i>Gas8</i>    | Growth arrest-specific protein 8                      | Sperm motility       | 0.0246 | 0.4897 | 0.05023 |
| <i>Cyct</i>    | Cytochrome c, testis-specific                         | Sperm metabolism     | 0.017  | 0.3388 | 0.0502  |
| <i>Sept4</i>   | Septin-4                                              | Spermatogenesis      | 0.0104 | 0.2083 | 0.0499  |
| <i>Nhe5</i>    | Sodium/hydrogen exchanger 5                           | Sperm motility       | 0.0096 | 0.2054 | 0.04665 |
| <i>Atp5b</i>   | ATP synthetase beta subunit, mitochondrial            | Sperm metabolism     | 0.0078 | 0.1681 | 0.0464  |
| <i>Pyk2</i>    | Protein-tyrosine kinase 2-beta                        | Capacitation         | 0.002  | 0.0462 | 0.0433  |
| <i>Syt6</i>    | Synaptotagmin-6                                       | Acrosome reaction    | 0.0096 | 0.2588 | 0.03718 |
| <i>Celf3</i>   | CUGBP Elav-like family member 3                       | Spermatogenesis      | 0.004  | 0.1103 | 0.0363  |
| <i>Prkcz</i>   | Protein kinase C zeta type                            | Acrosome reaction    | 0      | 0.0058 | 0.03498 |
| <i>Trim36</i>  | E3 ubiquitin-protein ligase Trim36                    | Acrosome reaction    | 0.0071 | 0.2019 | 0.03495 |
| <i>Adcy8</i>   | Adenylate cyclase type 8                              | Capacitation         | 0.0051 | 0.1929 | 0.02669 |
| <i>Chrna7</i>  | Neuronal acetylcholine receptor subunit alpha-7       | Sperm motility       | 0.0039 | 0.153  | 0.02526 |
| <i>Pfkfb4</i>  | 6-phosphofructo-2-kinase/fructose-2,6-biphosphatase 4 | Sperm metabolism     | 0.0048 | 0.1891 | 0.0251  |
| <i>Ift88</i>   | Intraflagellar transport protein 88 homolog           | Sperm motility       | 0.0048 | 0.1891 | 0.0251  |
| <i>Neurl1a</i> | Neuralized-like protein 1A                            | Sperm motility       | 0.0023 | 0.0941 | 0.0247  |
| <i>Adcy2</i>   | Adenylate cyclase type 2                              | Capacitation         | 0.005  | 0.2241 | 0.02223 |
| <i>Rab14</i>   | Ras-related protein Rab-14                            | Capacitation         | 0.0021 | 0.0976 | 0.0211  |
| <i>Spag6</i>   | Sperm associated antigen 6                            | Sperm motility       | 0.0049 | 0.2339 | 0.02084 |
| <i>Prkaca</i>  | Sperm -specific protein kinase A catalytic subunit    | Capacitation         | 0.0024 | 0.1476 | 0.0166  |
| <i>Dazla</i>   | Deleted in azoospermia-like                           | Spermatogenesis      | 0.0018 | 0.1476 | 0.0122  |
| <i>Tssk6</i>   | Testis-specific serine/threonine-protein kinase-6     | Spermatogenesis      | 0.0016 | 0.149  | 0.0107  |
| <i>Nhe1</i>    | Sodium/hydrogen exchanger 1                           | Sperm motility       | 0.0251 | 3.3664 | 0.00745 |
| <i>Glr1</i>    | Glycine receptor subunit alpha 1                      | Acrosome reaction    | 0.0019 | 0.3554 | 0.0053  |
| <i>Vcp</i>     | Transitional endoplasmic reticulum ATPase             | Acrosome reaction    | 0.0006 | 0.1645 | 0.0035  |
| <i>Akt1</i>    | RAC-alpha serine/threonine-protein kinase             | Acrosome reaction    | 0.0317 | 1.1551 | 0.00312 |
| <i>Calm1</i>   | Calmodulin                                            | Capacitation         | 0      | 0.0058 | 0.0000  |
