# Supplementary material for: Proteins Involved in Motility and Sperm-Egg Interaction Evolve More Rapidly in Mouse Spermatozoa
Source: PubMed Central journal article supplement (PMC3948348; doi:10.1371/journal.pone.0091302), 2014-03-07
Supplement: pone.0091302.s004.pdf [file pone.0091302.s004.pdf]

**Table S4.** Analysis of positive selection in sperm genes. Results of likelihood ratio test (LRT) comparing the likelihood values obtained in models M8 and M8a are presented. Evidence of positive selection is detected as the comparison of the LRT with the 50:50 mixture of point mass 0 and  $\chi^2$  is greater than the critical value 5.41 at 1% of significance. Inferred positively selected sites with BEB posterior probabilities > 0.95 (\*) and > 0.99 (\*\*) are shown.

| Protein  | Protein name                                                         | Reproductive process  | LRT M8vsM8a | Positive selection M8vsM8a (df = 2) |
|----------|----------------------------------------------------------------------|-----------------------|-------------|-------------------------------------|
| G6pd2    | Glucose-6-phosphate 1-dehydrogenase 2                                | Sperm metabolism      | 104.84      | Yes                                 |
| Fscb     | Fibrous sheath CABYR-binding protein                                 | Spermatogenesis       | 85.52       | Yes                                 |
| Smky     | Sperm motility Kinase Y                                              | Sperm motility        | 85.18       | Yes                                 |
| Chdh     | Choline dehydrogenase                                                | Sperm motility        | 48.80       | Yes                                 |
| Adam24   | A disintegrin and metallopeptidase domain 24                         | Sperm-egg interaction | 44.03       | Yes                                 |
| Smok2a   | Sperm motility kinase 2A                                             | Sperm motility        | 40.73       | Yes                                 |
| ldh1     | Isocitrate dehydrogenase [NADP] cytoplasmic                          | Sperm metabolism      | 38.24       | Yes                                 |
| Ropn1    | Ropporin-1                                                           | Sperm motility        | 34.38       | Yes                                 |
| Smok2b   | Sperm motility kinase 2B                                             | Sperm motility        | 33.33       | Yes                                 |
| Gapdhs   | Glyceraldehyde-3-phosphate dehydrogenase, spermatogenic              | Sperm metabolism      | 31.18       | Yes                                 |
| Pgk2     | Phosphoglycerate kinase 2                                            | Sperm metabolism      | 27.31       | Yes                                 |
| Krt9     | Keratin-9                                                            | Spermatogenesis       | 26.95       | Yes                                 |
| Fsip2    | Fibrous sheath-interacting protein 2                                 | Capacitation          | 24.44       | Yes                                 |
| Crisp1   | Cysteine-rich secretory protein 1                                    | Sperm-egg interaction | 24.08       | Yes                                 |
| Atp1a4   | Sodium/potassium-transporting ATPase subunit alpha-4                 | Sperm motility        | 24.07       | Yes                                 |
| Afaf     | Acrosome formation- associated factor                                | Acrosome reaction     | 22.45       | Yes                                 |
| Adam18   | A disintegrin and metallopeptidase domain 18                         | Sperm-egg interaction | 21.93       | Yes                                 |
| Sp56     | Zona pellucida sperm-binding protein 3 receptor                      | Sperm-egg interaction | 21.48       | Yes                                 |
| Prm1     | Protamine 1                                                          | Spermatogenesis       | 21.40       | Yes                                 |
| Adam32   | A disintegrin and metallopeptidase domain 32                         | Sperm-egg interaction | 21.01       | Yes                                 |
| Car4     | Carbonic anhydrase-4                                                 | Sperm motility        | 19.31       | Yes                                 |
| Nhe5     | Sodium/hydrogen exchanger 5                                          | Sperm motility        | 19.26       | Yes                                 |
| Tekt4    | Tektin-4                                                             | Sperm motility        | 18.75       | Yes                                 |
| Pdia3    | Disulfide isomerase A3                                               | Spermatogenesis       | 18.72       | Yes                                 |
| Smcp     | Sperm mitochondria-associated cysteine-rich protein.                 | Sperm motility        | 15.36       | Yes                                 |
| CatsperG | Cation channel sperm associated protein G                            | Sperm motility        | 13.77       | Yes                                 |
| Plscr2   | Phospholipid scramblase 2                                            | Capacitation          | 13.69       | Yes                                 |
| Tctex5   | Dynein light chain Tctex-type 5                                      | Sperm motility        | 13.26       | Yes                                 |
| Slx1     | Putative novel protein similar to Xlr-related, meiosis regulated Xmr | Sperm-egg interaction | 12.56       | Yes                                 |
| Pkm2     | Pyruvate kinase isozymes M1/M2                                       | Sperm metabolism      | 12.38       | Yes                                 |
| Catsper3 | Cation channel sperm associated protein 3                            | Sperm motility        | 12.31       | Yes                                 |

| Protein  | Protein name                                                     | Reproductive process  | LRT M8vsM8a | Positive selection M8vsM8a (df = 2) |
|----------|------------------------------------------------------------------|-----------------------|-------------|-------------------------------------|
| Tnp2     | Transition protein-2                                             | Spermatogenesis       | 11.98       | Yes                                 |
| Zan      | Zonadhesin                                                       | Sperm-egg interaction | 11.97       | Yes                                 |
| Celf3    | CUGBP Elav-like family member 3                                  | Spermatogenesis       | 11.91       | Yes                                 |
| Ph20     | Hyaluronidase PH-20                                              | Sperm-egg interaction | 11.65       | Yes                                 |
| Tmem190  | Transmembrane protein 190                                        | Sperm-egg interaction | 10.44       | Yes                                 |
| CatSper2 | Cation channel sperm associated protein 2                        | Sperm motility        | 10.15       | Yes                                 |
| Spatc1   | Speriolin                                                        | Spermatogenesis       | 9.76        | Yes                                 |
| Rsph1    | Radial spoke head 1 homolog                                      | Spermatogenesis       | 9.59        | Yes                                 |
| Sptrx1   | Thioredoxin domain-containing protein 2                          | Spermatogenesis       | 9.39        | Yes                                 |
| Dlat     | Dihydrolipoylysine-residue acetyltransferase                     | Sperm metabolism      | 8.82        | Yes                                 |
| Acrv1    | Acrosomal protein SP-10                                          | Sperm-egg interaction | 8.45        | Yes                                 |
| Clgn     | Calmegin                                                         | Sperm-egg interaction | 8.29        | Yes                                 |
| Cacna1c  | Voltage-dependent L-type calcium channel subunit alpha-1C        | Capacitation          | 7.23        | Yes                                 |
| Spata16  | Spermatogenesis-associated protein 16                            | Spermatogenesis       | 6.76        | Yes                                 |
| Zpbp2    | Zona pellucida binding protein-2                                 | Sperm-egg interaction | 5.94        | Yes                                 |
| Mgea5    | Beta-N-acetylhexosaminidase                                      | Sperm-egg interaction | 5.78        | Yes                                 |
| Trpc3    | Short transient receptor potential channel 3                     | Capacitation          | 5.47        | Yes                                 |
| Oxct2a   | Succinyl-CoA:3-ketoacid-coenzyme A transferase 2A, mitochondrial | Sperm metabolism      | 5.12        | No                                  |
| Zpbp1    | Zona pellucida binding protein-1                                 | Sperm-egg interaction | 5.04        | No                                  |
| Cabyr    | Calcium-binding tyrosine phosphorylation-regulated protein       | Capacitation          | 5.04        | No                                  |
| Prm2     | Protamine 2                                                      | Spermatogenesis       | 4.45        | No                                  |
| Hyal5    | Hyaluronidase-5                                                  | Sperm-egg interaction | 4.30        | No                                  |
| Gpd2     | Glycerol phosphate dehydrogenase 2                               | Sperm metabolism      | 4.30        | No                                  |
| Tnp1     | Transition protein-1                                             | Spermatogenesis       | 3.55        | No                                  |
| Taf7l    | Transcription initiation factor TFIID subunit 7-like             | Spermatogenesis       | 3.39        | No                                  |
| Plcd4    | Phospholipase C delta 4                                          | Acrosome reaction     | 3.39        | No                                  |
| Mpi      | Mannose-6-phosphate isomerase                                    | Sperm metabolism      | 3.34        | No                                  |
| Stx2     | Syntaxin-2                                                       | Spermatogenesis       | 3.28        | No                                  |
| Pde4d    | Phosphodiesterase 4d                                             | Capacitation          | 3.25        | No                                  |
| Pla2g1b  | Phospholipase A2                                                 | Acrosome reaction     | 2.93        | No                                  |
| Ak1      | Adenylate kinase 1                                               | Sperm motility        | 2.64        | No                                  |
| Eno1     | Enolase 1                                                        | Sperm metabolism      | 2.35        | No                                  |
| Rhpn1    | Rhophilin-1                                                      | Sperm motility        | 2.13        | No                                  |

| Protein | Protein name                                              | Reproductive process  | LRT M8vsM8a | Positive selection M8vsM8a (df = 2) |
|---------|-----------------------------------------------------------|-----------------------|-------------|-------------------------------------|
| Ppp3r2  | Calcineurin subunit B type 2                              | Capacitation          | 2.02        | No                                  |
| Adam1b  | A disintegrin and metallopeptidase domain 1b              | Sperm-egg interaction | 1.93        | No                                  |
| Atp8b3  | ATPase class I type 8B member 3                           | Sperm-egg interaction | 1.80        | No                                  |
| Chrna7  | Neuronal acetylcholine receptor subunit alpha-7           | Sperm motility        | 1.77        | No                                  |
| Boll    | Boule-like protein                                        | Spermatogenesis       | 1.74        | No                                  |
| Cacna1h | Voltage-dependent T-type calcium channel subunit alpha-1H | Acrosome reaction     | 1.70        | No                                  |
| Tsk6    | Testis-specific serine/threonine-protein kinase-6         | Spermatogenesis       | 1.65        | No                                  |
| Bsg     | Basigin                                                   | Sperm-egg interaction | 1.36        | No                                  |
| Sed1    | Bimotif EGF Repeat and Discoidin-Domain Protein-1         | Sperm-egg interaction | 1.02        | No                                  |
| Pvrl2   | Nectin 2                                                  | Spermatogenesis       | 0.98        | No                                  |
| Hils1   | Histone H1-like protein in spermatids 1                   | Spermatogenesis       | 0.90        | No                                  |
| Tekt3   | Tektin-3                                                  | Sperm motility        | 0.89        | No                                  |
| Ldhc    | L-lactate dehydrogenase C chain                           | Sperm metabolism      | 0.80        | No                                  |
| Ptpn1   | Tyrosine-protein phosphatase non-receptor type 1          | Acrosome reaction     | 0.73        | No                                  |
| Dbil5   | Diazepam-binding inhibitor-like 5                         | Sperm metabolism      | 0.65        | No                                  |
| Ctnn    | Cottractine                                               | Spermatogenesis       | 0.58        | No                                  |
| Dpep3   | Dipeptidase 3                                             | Spermatogenesis       | 0.56        | No                                  |
| Adcy2   | Adenylate cyclase type 2                                  | Capacitation          | 0.34        | No                                  |
| Dnmt3l  | DNA (cytosine-5)-methyltransferase 3-like                 | Spermatogenesis       | 0.32        | No                                  |
| Acrbp   | Acrosin binding protein                                   | Acrosome reaction     | 0.30        | No                                  |
| Tctex1  | Dynein light chain Tctex-type 1                           | Sperm motility        | 0.20        | No                                  |
| Tcte1   | T-complex-associated testis-expressed protein 1           | Sperm-egg interaction | 0.20        | No                                  |
| Sept4   | Septin-4                                                  | Spermatogenesis       | 0.18        | No                                  |
| Pebp1   | Phosphatidylethanolamine-binding protein 1                | Capacitation          | 0.15        | No                                  |
| Gpi1    | Glucose phosphate isomerase                               | Sperm metabolism      | 0.07        | No                                  |
| Pgam2   | Phosphoglycerate mutase 2                                 | Sperm metabolism      | 0.07        | No                                  |
| Slc25a1 | Solute carrier family 25 member 1                         | Sperm motility        | 0.07        | No                                  |
| Ctsl1   | Cysteine-specific cathepsin                               | Sperm-egg interaction | 0.04        | No                                  |
| Aldoa1  | Fructosa bisphosphate aldolase                            | Sperm metabolism      | 0.01        | No                                  |
| Prkaca  | Sperm -specific protein kinase A catalytic subunit        | Capacitation          | 0.01        | No                                  |
| Akt1    | RAC-alpha serine/threonine-protein kinase                 | Acrosome reaction     | 0.00        | No                                  |
| Tsk1    | Testis-specific serine/threonine-protein kinase-1         | Spermatogenesis       | 0.00        | No                                  |
| Pcsk4   | Proprotein convertase subtilisin/kexin type 4             | Capacitation          | 0.00        | No                                  |
| B4galt1 | Beta-1,4 galactosyltransferase 1                          | Sperm-egg interaction | 0.00        | No                                  |
| Hk1s    | Hexokinase-1, spermatogenic cell-specific                 | Sperm metabolism      | 0.00        | No                                  |

| Protein | Protein name                                                      | Reproductive process  | LRT M8vsM8a | Positive selection M8vsM8a (df = 2) |
|---------|-------------------------------------------------------------------|-----------------------|-------------|-------------------------------------|
| Spesp1  | Sperm equatorial segment protein 1                                | Sperm-egg interaction | 0.00        | No                                  |
| Calm1   | Calmodulin                                                        | Capacitation          | 0.00        | No                                  |
| Vdac3   | Voltage-dependent-anion channel mitochondrial                     | Spermatogenesis       | 0.00        | No                                  |
| Vcp     | Transitional endoplasmic reticulum ATPase                         | Acrosome reaction     | 0.00        | No                                  |
| Prkcz   | Protein kinase C zeta type                                        | Acrosome reaction     | 0.00        | No                                  |
| Arsa    | Arylsulfatase A                                                   | Sperm-egg interaction | 0.00        | No                                  |
| Calca   | Calcitonin-related polypeptide, alpha                             | Capacitation          | 0.00        | No                                  |
| Spaca3  | Sperm acrosome membrane-associated protein 3                      | Sperm-egg interaction | 0.00        | No                                  |
| Enkur   | Enkurin                                                           | Acrosome reaction     | 0.00        | No                                  |
| Spata24 | Spermatogenesis-associated protein 24                             | Spermatogenesis       | 0.00        | No                                  |
| Pik3c3  | Phosphoinositide-3-kinase, class 3                                | Acrosome reaction     | 0.00        | No                                  |
| Cox6b2  | Cytochrome c oxidase subunit 6B2                                  | Sperm metabolism      | 0.00        | No                                  |
| Crisp2  | Cysteine-rich secretory protein 2                                 | Sperm-egg interaction | 0.00        | No                                  |
| Itpr1   | Inositol 1,4,5-trisphosphate receptor type 1                      | Acrosome reaction     | 0.00        | No                                  |
| Dkk1    | Dickkopf-like 1                                                   | Sperm-egg interaction | 0.00        | No                                  |
| Ccna1   | Cyclin A1                                                         | Spermatogenesis       | 0.00        | No                                  |
| Pdpk1   | 3-phosphoinositide dependent protein kinase 1                     | Acrosome reaction     | 0.00        | No                                  |
| Atp5b   | ATP synthetase beta subunit, mitochondrial                        | Sperm metabolism      | 0.00        | No                                  |
| Pfkfb4  | 6-phosphofructo-2-kinase/fructose-2,6-biphosphatase 4             | Sperm metabolism      | 0.00        | No                                  |
| Ift88   | Intraflagellar transport protein 88 homolog                       | Sperm motility        | 0.00        | No                                  |
| Rab14   | Ras-related protein Rab-14                                        | Capacitation          | 0.00        | No                                  |
| Dazla   | Deleted in azoospermia-like                                       | Spermatogenesis       | 0.00        | No                                  |
| Glr1    | Glycine receptor subunit alpha 1                                  | Acrosome reaction     | 0.00        | No                                  |
| Adcy8   | Adenylate cyclase type 8                                          | Capacitation          | 0.00        | No                                  |
| Cyct    | Cytochrome c, testis-specific                                     | Sperm metabolism      | 0.00        | No                                  |
| Tex101  | Testis-expressed protein 101                                      | Capacitation          | 0.00        | No                                  |
| Fkbp6   | Peptidyl-prolyl cis-trans isomerase FKBP6                         | Spermatogenesis       | 0.00        | No                                  |
| Csl     | Cytrate synthase-like gene                                        | Sperm metabolism      | 0.00        | No                                  |
| Ace     | Angiotensin-converting enzyme                                     | Sperm-egg interaction | 0.00        | No                                  |
| Syt6    | Synaptotagmin-6                                                   | Acrosome reaction     | 0.00        | No                                  |
| Pik3r3  | Phosphatidil inositol 3 kinasa regulatory subunit 3               | Acrosome reaction     | 0.00        | No                                  |
| Tsk2    | Testis-specific serine/threonine-protein kinase-2                 | Spermatogenesis       | 0.00        | No                                  |
| Akap110 | A- kinase anchor protein 3                                        | Sperm motility        | 0.00        | No                                  |
| Glut3   | Solute carrier family 2, facilitated glucose transporter member 3 | Sperm metabolism      | -0.01       | No                                  |
| Etv5    | ETS translocation variant 5                                       | Spermatogenesis       | -0.01       | No                                  |

| Protein  | Protein name                                                           | Reproductive process  | LRT M8vsM8a | Positive selection M8vsM8a (df = 2) |
|----------|------------------------------------------------------------------------|-----------------------|-------------|-------------------------------------|
| Akap82   | A- kinase anchor protein 82                                            | Sperm motility        | -0.01       | No                                  |
| Sacy     | Soluble adenylate cyclase                                              | Capacitation          | -0.03       | No                                  |
| Gas8     | Growth arrest-specific protein 8                                       | Sperm motility        | -0.05       | No                                  |
| Pyk2     | Protein-tyrosine kinase 2-beta                                         | Capacitation          | -0.06       | No                                  |
| Dnah12   | Dynein heavy chain 12                                                  | Sperm motility        | -0.10       | No                                  |
| Ddx4     | Probable ATP-dependent RNA helicase                                    | Spermatogenesis       | -0.87       | No                                  |
| Trim36   | E3 ubiquitin-protein ligase Trim36                                     | Acrosome reaction     | -1.41       | No                                  |
| Odf4     | Outer dense fiber protein-4                                            | Sperm motility        | -1.49       | No                                  |
| Izumo1   | Izumo sperm-egg fusion protein 1                                       | Sperm-egg interaction | -2.06       | No                                  |
| Crisp4   | Cysteine-rich secretory protein 4                                      | Sperm-egg interaction | -2.99       | No                                  |
| Neur1a   | Neuralized-like protein 1A                                             | Sperm motility        | -3.15       | No                                  |
| Adam3    | A disintegrin and metallopeptidase domain 3                            | Sperm-egg interaction | -3.80       | No                                  |
| Syt8     | Synaptotagmin-8                                                        | Acrosome reaction     | -4.08       | No                                  |
| Dld      | Dihydrolipoamide dehydrogenase                                         | Capacitation          | -6.55       | No                                  |
| Adam2    | A disintegrin and metallopeptidase domain 2                            | Sperm-egg interaction | -8.19       | No                                  |
| H1fnt    | Testis-specific H1 histone                                             | Spermatogenesis       | -9.84       | No                                  |
| Pkdrej   | Polycystic kidney disease and receptor for egg jelly-related protein   | Sperm-egg interaction | -11.25      | No                                  |
| Tekt2    | Tektin-2                                                               | Spermatogenesis       | -15.23      | No                                  |
| Pmca4    | Plasma membrane calcium/calmodulin-dependent calcium ATPase, isoform 4 | Sperm motility        | -22.61      | No                                  |
| Trpc2    | Short transient receptor potential channel 2                           | Acrosome reaction     | -23.05      | No                                  |
| Svs2     | Semenogelin-1                                                          | Capacitation          | -24.43      | No                                  |
| Catsper4 | Cation channel sperm associated protein 4                              | Sperm motility        | -27.34      | No                                  |
| Catsper1 | Cation channel sperm associated protein 1                              | Sperm motility        | -27.89      | No                                  |
| Slo3     | Potassium channel subfamily U member 1                                 | Capacitation          | -28.12      | No                                  |
| Spag6    | Sperm associated antigen 6                                             | Sperm motility        | -34.96      | No                                  |
| Adam1a   | A disintegrin and metallopeptidase domain 1a                           | Sperm-egg interaction | -40.16      | No                                  |
| Smok4a   | Sperm motility kinase 4A                                               | Sperm motility        | -45.89      | No                                  |
| Cd46     | CD46 antigen, complement regulatory protein                            | Acrosome reaction     | -56.32      | No                                  |
| Pdha2    | Piruvate dehydrogenase A2                                              | Sperm metabolism      | -65.57      | No                                  |
| Nhe1     | Sodium/hydrogen exchanger 1                                            | Sperm motility        | -179.12     | No                                  |
| Nhe10    | Sodium/hydrogen exchanger 10                                           | Sperm motility        | -190.45     | No                                  |

| Protein  | Positively selected sites                                                                                                                                                                                                                                            |
|----------|----------------------------------------------------------------------------------------------------------------------------------------------------------------------------------------------------------------------------------------------------------------------|
| G6pd2    | 231A**, 294R**                                                                                                                                                                                                                                                       |
| Fscb     | 105I*, 459S**, 551P**, 572F**, 857G**, 878M*, 978S**                                                                                                                                                                                                                 |
| Smky     | 29K*, 34L**, 46K**, 60L**, 65C**, 69A**, 75I**, 91F**, 115S*, 140G*, 141L**, 156D*, 179H*, 186G**, 199T**, 222I**, 243N**, 246K*, 273R*, 276C**, 280T**, 287V**, 298A*, 330E**, 359E**, 372S*, 381P*, 390V**, 402S**, 407L**, 409E**, 410P**, 415P**, 461R**, 494Q** |
| Chdh     | 4V**, 12W**, 24Q**                                                                                                                                                                                                                                                   |
| Adam24   | 453H**, 620D**, 677N*, 720E**                                                                                                                                                                                                                                        |
| Smok2a   | 7Q*, 36S*, 38K**, 98R*, 109A**, 174G*, 181T*, 224T*, 240M*                                                                                                                                                                                                           |
| ldh1     | 229K*                                                                                                                                                                                                                                                                |
| Ropn1    | 149N*                                                                                                                                                                                                                                                                |
| Smok2b   | 89R*, 101A*, 173G*, 180T*, 204V**, 374S*                                                                                                                                                                                                                             |
| Gapdhs   |                                                                                                                                                                                                                                                                      |
| Pgk2     | 151Q**, 176T**                                                                                                                                                                                                                                                       |
| Krt9     | 154A*, 168P*, 499H*, 532H*, 548G*, 572H*, 586G*, 587S*, 589G*, 591Y*, 592G*, 594G*, 595S*                                                                                                                                                                            |
| Fsip2    | 1247R*, 2310T*, 2627N*, 2903P*, 3311R*, 3547I*, 5639S*, 5755T*, 5844R*, 5903E*, 6823Y*                                                                                                                                                                               |
| Crisp1   | 112K**, 125V*, 201K*, 208S*, 212E*                                                                                                                                                                                                                                   |
| Atp1a4   |                                                                                                                                                                                                                                                                      |
| Afaf     | 50A*, 123T**                                                                                                                                                                                                                                                         |
| Adam18   | 35H*, 145N*, 159T*, 327R*                                                                                                                                                                                                                                            |
| Sp56     | 7I*, 8E**, 228L**, 519A**                                                                                                                                                                                                                                            |
| Prm1     | 46I**                                                                                                                                                                                                                                                                |
| Adam32   | 154I*, 342S*, 422R*, 427A*, 456E*                                                                                                                                                                                                                                    |
| Car4     | 97V**                                                                                                                                                                                                                                                                |
| Nhe5     |                                                                                                                                                                                                                                                                      |
| Tekt4    | 4T*, 145T*, 210S**, 262Q**                                                                                                                                                                                                                                           |
| Pdia3    | 20R*                                                                                                                                                                                                                                                                 |
| Smcp     | 51P*, 69P*, 74Q*, 109T**, 130N*                                                                                                                                                                                                                                      |
| CatsperG | 323H*                                                                                                                                                                                                                                                                |
| Plscr2   | 177K (**)                                                                                                                                                                                                                                                            |
| Tctex5   | 23T*, 79S**                                                                                                                                                                                                                                                          |
| Slx1     | 34I**, 76E**                                                                                                                                                                                                                                                         |
| Pkm2     | 385L*, 388I**, 393T*                                                                                                                                                                                                                                                 |
| Catsper3 |                                                                                                                                                                                                                                                                      |

| Protein  | Positively selected sites                                                                                                                                                                                                                                                                                                     |
|----------|-------------------------------------------------------------------------------------------------------------------------------------------------------------------------------------------------------------------------------------------------------------------------------------------------------------------------------|
| Tnp2     |                                                                                                                                                                                                                                                                                                                               |
| Zan      | 104Q**, 692A**, 703Y*, 779Y*, 868T**, 878L**, 956V*, 959V**, 997S**, 1032E*, 1042V*, 1645V**, 1767M**, 2714A**, 2765D**, 2854T*, 2889M**, 3109T**, 3203*, 3214**, 3587T**, 3671P**, 3690S**, 3720D**, 3761V**, 3853K**, 3897H**, 3898N*, 4032G**, 4132T**, 4300G**, 4307S**, 4358T*, 4363N*, 4490E**, 4533D*, 4674I**, 5216A* |
| Celf3    |                                                                                                                                                                                                                                                                                                                               |
| Ph20     | 8H*, 97L*, 123R*                                                                                                                                                                                                                                                                                                              |
| Tmem190  | 117H*, 143V*, 144L*                                                                                                                                                                                                                                                                                                           |
| CatSper2 | 49A*, 490I**                                                                                                                                                                                                                                                                                                                  |
| Spatc1   |                                                                                                                                                                                                                                                                                                                               |
| Rsph1    | 189T*, 238P*, 260L*                                                                                                                                                                                                                                                                                                           |
| Sptrx1   | 266S*, 272Q*, 323E*, 387G*                                                                                                                                                                                                                                                                                                    |
| Dlat     | 172D**                                                                                                                                                                                                                                                                                                                        |
| Acrv1    |                                                                                                                                                                                                                                                                                                                               |
| Clgn     | 2R**, 291K*                                                                                                                                                                                                                                                                                                                   |
| Cacna1c  |                                                                                                                                                                                                                                                                                                                               |
| Spata16  |                                                                                                                                                                                                                                                                                                                               |
| Zpbp2    |                                                                                                                                                                                                                                                                                                                               |
| Mgea5    |                                                                                                                                                                                                                                                                                                                               |
| Trpc3    |                                                                                                                                                                                                                                                                                                                               |
| Oxct2a   |                                                                                                                                                                                                                                                                                                                               |
| Zpbp1    |                                                                                                                                                                                                                                                                                                                               |
| Cabyr    |                                                                                                                                                                                                                                                                                                                               |
| Prm2     |                                                                                                                                                                                                                                                                                                                               |
| Hyal5    |                                                                                                                                                                                                                                                                                                                               |
| Gpd2     |                                                                                                                                                                                                                                                                                                                               |
| Tnp1     |                                                                                                                                                                                                                                                                                                                               |
| Taf7l    |                                                                                                                                                                                                                                                                                                                               |
| Plcd4    |                                                                                                                                                                                                                                                                                                                               |
| Mpi      |                                                                                                                                                                                                                                                                                                                               |
| Stx2     |                                                                                                                                                                                                                                                                                                                               |
| Pde4d    |                                                                                                                                                                                                                                                                                                                               |
| Pla2g1b  |                                                                                                                                                                                                                                                                                                                               |
| Ak1      |                                                                                                                                                                                                                                                                                                                               |
| Eno1     |                                                                                                                                                                                                                                                                                                                               |
| Rhpn1    |                                                                                                                                                                                                                                                                                                                               |

| Protein | Positively selected sites |
|---------|---------------------------|
| Ppp3r2  |                           |
| Adam1b  |                           |
| Atp8b3  |                           |
| Chrna7  |                           |
| Boll    |                           |
| Cacna1h |                           |
| Tssk6   |                           |
| Bsg     |                           |
| Sed1    |                           |
| Pvrl2   |                           |
| Hils1   |                           |
| Tekt3   |                           |
| Ldhc    |                           |
| Ptpn1   |                           |
| Dbil5   |                           |
| Ctnn    |                           |
| Dpep3   |                           |
| Adcy2   |                           |
| Dnmt3l  |                           |
| Acrbp   |                           |
| Tctex1  |                           |
| Tcte1   |                           |
| Sept4   |                           |
| Pebp1   |                           |
| Gpi1    |                           |
| Pgam2   |                           |
| Slc25a1 |                           |
| Ctsl1   |                           |
| Aldoa1  |                           |
| Prkaca  |                           |
| Akt1    |                           |
| Tssk1   |                           |
| Pcsk4   |                           |
| B4galt1 |                           |
| Hk1s    |                           |



| Protein | Positively selected sites |
|---------|---------------------------|
| Spesp1  |                           |
| Calm1   |                           |
| Vdac3   |                           |
| Vcp     |                           |
| Prkcz   |                           |
| Arsa    |                           |
| Calca   |                           |
| Spaca3  |                           |
| Enkur   |                           |
| Spata24 |                           |
| Pik3c3  |                           |
| Cox6b2  |                           |
| Crisp2  |                           |
| Itpr1   |                           |
| Dkk1    |                           |
| Ccna1   |                           |
| Pdpk1   |                           |
| Atp5b   |                           |
| Pfkfb4  |                           |
| Ift88   |                           |
| Rab14   |                           |
| Dazla   |                           |
| Gira1   |                           |
| Adcy8   |                           |
| Cycl    |                           |
| Tex101  |                           |
| Fkbp6   |                           |
| Csl     |                           |
| Ace     |                           |
| Syt6    |                           |
| Pik3r3  |                           |
| Tssk2   |                           |
| Akap110 |                           |
| Glut3   |                           |
| Etv5    |                           |

| Protein  | Positively selected sites            |
|----------|--------------------------------------|
| Akap82   |                                      |
| Sacy     |                                      |
| Gas8     |                                      |
| Pyk2     |                                      |
| Dnah12   |                                      |
| Ddx4     |                                      |
| Trim36   |                                      |
| Odf4     |                                      |
| Izumo1   | 150L*, 240Q*                         |
| Crisp4   |                                      |
| Neur1a   |                                      |
| Adam3    |                                      |
| Syt8     |                                      |
| Dld      |                                      |
| Adam2    |                                      |
| H1fnt    |                                      |
| Pkdrej   | 887C*, 890M**, 1034M*, 1873F*        |
| Tekt2    |                                      |
| Pmca4    |                                      |
| Trpc2    | 97R**, 102S*, 185R**, 274G**, 321A** |
| Svs2     | 45H**, 132V*, 138Y*, 255F**          |
| Catsper4 |                                      |
| Catsper1 |                                      |
| Slo3     |                                      |
| Spag6    |                                      |
| Adam1a   | 117S**                               |
| Smok4a   |                                      |
| Cd46     | 46R*, 312P**                         |
| Pdha2    |                                      |
| Nhe1     | 22M*                                 |
| Nhe10    | 37T*, 650I*, 784T*                   |
